# Supplementary material
Source: publisher site journal article supplement (https://www.dovepress.com/get_supplementary_file.php?f=484034.xlsx)
Supplement: Supplementary file 1 [file get_supplementary_file.php]

## Sheet: Sheet1
Supplementary table 1: the genetic predisposition factors contributing to psoriasis pathology
Variant	Position	Eff. Allele	Trait	Beta	p-value	MAF	HWE	imp. score	ORbeta*	gene
rs12697351	35802427	T	psoriasis	0.00048653	0.2427	0.0749363	0.07511	0.981581	1.04	IL7R
rs4869667	35802648	A	psoriasis	0.00033399	0.32512	0.11805	0.04777	0.985765	1.03	IL7R
rs13359122	35802727	C	psoriasis	0.00033415	0.32485	0.118049	0.04968	0.985761	1.03	IL7R
rs114247783	35803036	T	psoriasis	3.8118e-05	0.94376	0.0432111	0.866	0.981197	1	IL7R
rs13164644	35803037	A	psoriasis	0.00025175	0.32905	0.23848	0.6596	0.981098	1.02	IL7R
rs931555	35803577	C	psoriasis	0.00053419	0.020516	0.3377	0.837	genotyped	1.05	IL7R
rs6893967	35803636	G	psoriasis	0.00032606	0.33639	0.118056	0.05075	0.987082	1.03	IL7R
rs73090210	35804562	G	psoriasis	0.0001459	0.61194	0.175325	0.1539	0.990431	1.01	IL7R
rs10155582	35804725	C	psoriasis	0.00031891	0.34502	0.117958	0.05147	0.99809	1.03	IL7R
rs991572	35804865	A	psoriasis	-0.00032287	0.33904	0.118	0.109	genotyped	0.972	IL7R
rs991571	35805125	C	psoriasis	0.0004602	0.089207	0.20742	0.291	0.984561	1.04	IL7R
rs192290312	35805178	T	psoriasis	0.0023463	0.18265	0.0042065	0.1345	0.907893	1.23	IL7R
rs991570	35805208	A	psoriasis	0.00026484	0.2364	0.396447	0.6965	0.9899	1.02	IL7R
rs114961763	35805232	T	psoriasis	0.00040039	0.44133	0.0492837	0.5308	0.933288	1.04	IL7R
rs1389837	35805339	T	psoriasis	0.0001515	0.53529	0.27846	0.603	0.987977	1.01	IL7R
rs1389836	35805553	C	psoriasis	0.00026395	0.30462	0.238816	0.7846	0.986762	1.02	IL7R
rs73090218	35805811	T	psoriasis	0.00031574	0.3496	0.117981	0.05557	0.998896	1.03	IL7R
rs149236770	35805939	G	psoriasis	-0.0031634	0.061102	0.00453112	0.01145	0.919135	0.756	IL7R
rs1494574	35806110	A	psoriasis	0.00026301	0.23967	0.396305	0.6833	0.989942	1.02	IL7R
rs11742689	35806148	T	psoriasis	-0.00030125	0.60151	0.0382531	1	0.966545	0.974	IL7R
rs147968150	35806960	T	psoriasis	0.00026264	0.78569	0.0129	0.8433	genotyped	1.02	IL7R
rs36093359	35807070	C	psoriasis	0.0001434	0.55711	0.27886	0.5399	0.988072	1.01	IL7R
rs1494573	35807132	T	psoriasis	0.00031828	0.34589	0.117992	0.05557	0.997986	1.03	IL7R
rs7736291	35807455	G	psoriasis	0.00026106	0.24307	0.396939	0.7262	0.989854	1.02	IL7R
rs1908369	35808115	A	psoriasis	0.00032898	0.33021	0.117927	0.05239	0.997128	1.03	IL7R
rs191639513	35808404	T	psoriasis	-0.0010962	0.33956	0.00938219	0.6366	0.966419	0.908	IL7R
rs6882117	35808747	C	psoriasis	0.00014036	0.56551	0.278897	0.5947	0.987795	1.01	IL7R
rs143141448	35809163	A	psoriasis	0.0015008	0.42626	0.00367251	0.3358	0.909955	1.14	IL7R
rs716302	35810268	A	psoriasis	0.00026121	0.24211	0.400179	0.9858	0.990739	1.02	IL7R
rs1961426	35810561	T	psoriasis	0.00027019	0.23668	0.35701	0.8435	0.98951	1.02	IL7R
rs142338941	35810760	A	psoriasis	0.00082886	0.47542	0.00963205	0.9248	0.915299	1.08	IL7R
rs4869672	35811282	T	psoriasis	0.00027271	0.23328	0.354756	0.9374	0.988889	1.02	IL7R
rs11952663	35811721	C	psoriasis	0.00031061	0.2414	0.218309	0.8764	0.987762	1.03	IL7R
rs1494572	35811768	C	psoriasis	0.00026249	0.23965	0.4002	1	0.991411	1.02	IL7R
rs4869674	35811829	C	psoriasis	0.00035257	0.34018	0.0960753	0.4323	0.998849	1.03	IL7R
rs146508525	35811967	G	psoriasis	0.00013129	0.80784	0.0429624	0.9327	0.989608	1.01	IL7R
rs4869485	35811973	G	psoriasis	0.00027167	0.22374	0.400517	0.9687	0.990625	1.02	IL7R
rs4263524	35812220	G	psoriasis	0.00041822	0.12275	0.206502	0.2408	0.98622	1.04	IL7R
rs73090230	35812270	C	psoriasis	-0.00036639	0.32196	0.09602	0.7162	genotyped	0.968	IL7R
rs13436632	35812414	C	psoriasis	0.00028148	0.2075	0.398809	0.9972	0.991351	1.03	IL7R
rs12521860	35814105	C	psoriasis	0.00028061	0.2089	0.398646	0.9687	0.991575	1.03	IL7R
rs7726182	35815010	G	psoriasis	0.00028578	0.43436	0.0987627	0.2042	0.995354	1.03	IL7R
rs75948478	35815580	T	psoriasis	-0.00023224	0.91143	0.00277024	0.01765	0.967464	0.98	IL7R
rs114253581	35815681	T	psoriasis	-0.00022878	0.62822	0.0571555	0.1838	0.987142	0.98	IL7R
rs35081631	35815846	C	psoriasis	0.00017231	0.47135	0.298132	0.1638	0.992067	1.02	IL7R
rs6892686	35816128	T	psoriasis	0.00032591	0.37812	0.0963246	0.4612	0.995119	1.03	IL7R
rs151225004	35816289	G	psoriasis	0.0018749	0.40405	0.00260193	0.07554	0.902512	1.18	IL7R
rs1353254	35816518	C	psoriasis	0.00049208	0.067725	0.209154	0.2005	0.989343	1.04	IL7R
rs10941265	35816651	T	psoriasis	0.00028996	0.42668	0.0993636	0.246	0.993388	1.03	IL7R
rs1494569	35817219	A	psoriasis	0.00048125	0.074178	0.208733	0.1788	0.989574	1.04	IL7R
rs182799901	35818185	A	psoriasis	0.00091314	0.75623	0.00146673	0.1351	0.928333	1.08	IL7R
rs35968532	35818869	G	psoriasis	0.00017264	0.47059	0.297616	0.1829	0.993048	1.02	IL7R
rs79744841	35819054	G	psoriasis	-0.00085284	0.6842	0.00273068	0.01765	0.981435	0.927	IL7R
rs7709856	35819133	C	psoriasis	0.00045199	0.091558	0.212059	0.1417	0.98916	1.04	IL7R
rs6869232	35819147	G	psoriasis	0.00013543	0.65413	0.154242	0.3611	0.992719	1.01	IL7R
rs150652413	35819322	A	psoriasis	-0.00085512	0.68336	0.00273079	0.01738	0.981693	0.927	IL7R
rs1494568	35819634	A	psoriasis	0.00048161	0.073782	0.20889	0.1877	0.990135	1.04	IL7R
rs191607014	35819691	T	psoriasis	0.0026653	0.12511	0.00425387	0.1973	0.921563	1.27	IL7R
rs145314004	35820165	G	psoriasis	-0.003609	0.088957	0.00277904	0.5347	0.949572	0.727	IL7R
rs76141758	35820286	A	psoriasis	-0.00093638	0.65438	0.00274755	0.01765	0.972939	0.921	IL7R
rs117799617	35820326	A	psoriasis	-0.0016524	0.43703	0.00264945	0.01337	0.984104	0.864	IL7R
rs73090245	35820378	A	psoriasis	-0.001059	0.60945	0.00280553	0.01977	0.956917	0.911	IL7R
rs147609154	35820596	T	psoriasis	-0.00087718	0.67537	0.00273216	0.01765	0.983906	0.925	IL7R
rs142216028	35820678	A	psoriasis	-0.00085549	0.68328	0.00272583	0.01738	0.984016	0.927	IL7R
rs145860184	35820794	A	psoriasis	-0.001638	0.44128	0.00264723	0.01329	0.984108	0.865	IL7R
rs57804084	35820893	A	psoriasis	0.00032405	0.19753	0.252187	0.395	0.996416	1.03	IL7R
rs72740798	35821736	A	psoriasis	-0.00034068	0.82565	0.00539874	0.1141	0.921794	0.97	IL7R
rs7725599	35821747	A	psoriasis	0.00028653	0.25258	0.254801	0.5115	0.997397	1.03	IL7R
rs118171276	35823080	T	psoriasis	-0.00086933	0.67856	0.00272684	0.01729	0.983239	0.926	IL7R
rs1494567	35823247	C	psoriasis	0.00051842	0.054011	0.20901	0.2178	0.992404	1.05	IL7R
rs75114217	35823482	T	psoriasis	-0.0016841	0.42782	0.00265757	0.01359	0.983262	0.862	IL7R
rs56113663	35823554	G	psoriasis	0.00029638	0.23634	0.254884	0.4915	0.998524	1.03	IL7R
rs117226002	35823565	T	psoriasis	-0.0020373	0.33885	0.00264114	0.01322	0.983715	0.835	IL7R
rs11958811	35823883	T	psoriasis	0.00031635	0.20788	0.252063	0.4205	0.999286	1.03	IL7R
rs9292614	35824121	T	psoriasis	-0.00028819	0.25167	0.2526	0.1819	genotyped	0.975	IL7R
rs145495260	35824302	T	psoriasis	-0.0016412	0.44062	0.00264394	0.01272	0.984372	0.865	IL7R
rs76236360	35824488	A	psoriasis	0.0004937	0.06661	0.208682	0.204	0.992928	1.04	IL7R
rs189517578	35824568	T	psoriasis	-0.00015484	0.95478	0.00167856	1	0.948526	0.986	IL7R
rs10472982	35824593	C	psoriasis	0.00030899	0.21851	0.252296	0.4366	0.999694	1.03	IL7R
rs2361395	35824922	C	psoriasis	0.00031189	0.21434	0.252146	0.4206	0.999385	1.03	IL7R
rs145860897	35824942	A	psoriasis	0.0014003	0.23751	0.0092685	1	0.911919	1.13	IL7R
rs13436926	35825173	T	psoriasis	-0.00056721	0.011046	0.399248	0.3399	0.995095	0.951	IL7R
rs138482720	35825382	A	psoriasis	-0.00085421	0.68382	0.00272412	0.01658	0.984165	0.927	IL7R
rs4242248	35825474	C	psoriasis	0.00038205	0.096545	0.345792	0.07773	0.994466	1.03	IL7R
rs4263525	35825485	A	psoriasis	-0.00027397	0.27351	0.255137	0.5621	0.99859	0.976	IL7R
rs4869426	35825573	G	psoriasis	-0.00056776	0.010969	0.399252	0.3454	0.995076	0.951	IL7R
rs7718034	35825602	G	psoriasis	0.00031811	0.20546	0.252025	0.4075	0.998926	1.03	IL7R
rs7718489	35825839	T	psoriasis	3.2083e-05	0.91964	0.136666	0.5968	0.993716	1	IL7R
rs4269308	35826053	T	psoriasis	-0.00029289	0.24171	0.255364	0.5412	0.998205	0.974	IL7R
rs6451223	35826139	C	psoriasis	-0.00027575	0.27047	0.255114	0.553	0.998384	0.976	IL7R
rs75266848	35826500	A	psoriasis	-0.001115	0.23013	0.01397	0.1564	genotyped	0.906	IL7R
rs576694519	35826505	G	psoriasis	0.0013558	0.67028	0.00126213	0.08426	0.923928	1.13	IL7R
rs139171948	35826637	G	psoriasis	0.00018152	0.79958	0.02388	0.6897	genotyped	1.02	IL7R
rs115886126	35826956	T	psoriasis	0.00013874	0.80509	0.0396356	0.6179	0.987331	1.01	IL7R
rs62353742	35827030	C	psoriasis	0.00031028	0.217	0.252104	0.3397	0.997812	1.03	IL7R
rs77993867	35827387	T	psoriasis	0.00044528	0.096393	0.211458	0.09968	0.993212	1.04	IL7R
rs903388	35827646	G	psoriasis	-0.0002969	0.18474	0.389946	0.4928	0.995604	0.974	IL7R
rs903389	35827665	G	psoriasis	-0.00029813	0.18292	0.38995	0.4996	0.995592	0.974	IL7R
rs146625217	35827703	C	psoriasis	0.0012015	0.42587	0.0055986	0.1028	0.932091	1.11	IL7R
rs903390	35827755	G	psoriasis	0.00043449	0.1045	0.211759	0.1134	0.992972	1.04	IL7R
rs149213663	35827806	C	psoriasis	-0.00088983	0.50618	0.00677183	0.3099	0.983432	0.924	IL7R
rs78070750	35827902	T	psoriasis	-0.00017183	0.76018	0.0395	0.62	genotyped	0.985	IL7R
rs6890572	35828012	A	psoriasis	-0.00026523	0.57008	0.0580509	0.07502	0.996098	0.977	IL7R
rs6871457	35828120	C	psoriasis	0.00031896	0.19533	0.269615	0.1255	0.99375	1.03	IL7R
rs75398371	35828301	G	psoriasis	-0.00056925	0.65981	0.007211	0.07062	genotyped	0.951	IL7R
rs77173787	35828362	G	psoriasis	-0.00080667	0.079769	0.0602996	0.7992	0.988621	0.931	IL7R
rs968833	35828522	C	psoriasis	-0.00087455	0.67645	0.00273052	0.01641	0.983519	0.926	IL7R
rs13162746	35828972	G	psoriasis	-0.001563	0.059536	0.0180928	0.06228	0.971777	0.871	IL7R
rs11742782	35829390	C	psoriasis	-0.00023211	0.6198	0.0577734	0.1002	0.998187	0.98	IL7R
rs189597697	35829621	T	psoriasis	-0.00033006	0.91729	0.00122922	0.08387	0.943282	0.971	IL7R
rs182577024	35829623	T	psoriasis	-0.00033191	0.9168	0.0012301	0.08387	0.94322	0.971	IL7R
rs6451224	35829691	A	psoriasis	-0.00026435	0.57117	0.0580573	0.07011	0.997301	0.977	IL7R
rs11950647	35830357	C	psoriasis	0.00027049	0.23403	0.380369	0.5486	0.975241	1.02	IL7R
rs73090262	35830618	A	psoriasis	-0.00033705	0.46078	0.0607318	0.09831	0.997018	0.971	IL7R
rs73090263	35830674	T	psoriasis	-0.00033773	0.45984	0.0607367	0.09832	0.997099	0.971	IL7R
rs11950763	35830733	C	psoriasis	0.00032564	0.19542	0.251859	0.321	0.997395	1.03	IL7R
rs79486852	35830742	C	psoriasis	-0.00032891	0.47107	0.060924	0.08742	0.996844	0.971	IL7R
rs10078972	35830823	C	psoriasis	0.00026412	0.57163	0.05829	0.02367	genotyped	1.02	IL7R
rs184284400	35830862	T	psoriasis	-0.0025974	0.31055	0.00192112	0.05889	0.923843	0.795	IL7R
rs115413094	35830873	A	psoriasis	-0.00021518	0.64606	0.0576249	0.09654	0.99766	0.981	IL7R
rs56123112	35831103	C	psoriasis	0.00031473	0.21066	0.252234	0.2448	0.997248	1.03	IL7R
rs116636204	35831133	C	psoriasis	0.00063496	0.51324	0.01279	0.1618	genotyped	1.06	IL7R
rs10050705	35831158	G	psoriasis	0.00018968	0.42091	0.311637	0.1667	0.997119	1.02	IL7R
rs143303465	35831383	A	psoriasis	7.716e-05	0.96222	0.00487284	0.08938	0.909839	1.01	IL7R
rs12516343	35831449	C	psoriasis	0.00049287	0.066512	0.209939	0.1527	0.993082	1.04	IL7R
rs6872082	35831690	G	psoriasis	0.00019303	0.41357	0.310458	0.1958	0.995605	1.02	IL7R
rs6872233	35831703	T	psoriasis	0.00019109	0.41842	0.310366	0.1796	0.995299	1.02	IL7R
rs6893803	35831744	C	psoriasis	0.00019694	0.40401	0.3106	0.1904	0.996137	1.02	IL7R
rs6872264	35831790	G	psoriasis	0.0001893	0.42208	0.311012	0.1839	0.997111	1.02	IL7R
rs6872631	35831936	T	psoriasis	0.00018988	0.42067	0.311003	0.184	0.99711	1.02	IL7R
rs10067863	35832177	G	psoriasis	0.00019024	0.41979	0.310997	0.184	0.997096	1.02	IL7R
rs10052964	35832221	A	psoriasis	0.00019075	0.41855	0.310987	0.1866	0.997063	1.02	IL7R
rs542003522	35832551	C	psoriasis	-0.0012679	0.42874	0.0049709	0.7325	0.935605	0.894	IL7R
rs11739191	35832583	A	psoriasis	-0.00025964	0.58245	0.0567159	0.01578	0.998184	0.977	IL7R
rs77589906	35832776	T	psoriasis	-0.00026595	0.65903	0.0342585	0.8962	0.984928	0.977	IL7R
rs112128371	35833094	G	psoriasis	-0.0010451	0.54605	0.00432404	0.289	0.915208	0.912	IL7R
rs114945684	35833202	A	psoriasis	0.00012119	0.83025	0.0393937	0.715	0.982457	1.01	IL7R
rs11953434	35833268	C	psoriasis	-0.00020105	0.35928	0.448831	0.6911	0.995358	0.982	IL7R
rs147093719	35833384	G	psoriasis	-0.001433	0.50394	0.00261041	0.0108	0.980428	0.881	IL7R
rs7733008	35833623	A	psoriasis	0.00031439	0.21154	0.251607	0.2785	0.99712	1.03	IL7R
rs11746643	35833717	G	psoriasis	-0.00060733	0.0065473	0.397879	0.2721	0.994966	0.948	IL7R
rs146655720	35833807	A	psoriasis	-0.0014279	0.50543	0.00260685	0.0105	0.983177	0.881	IL7R
rs10057131	35834122	A	psoriasis	-0.0002328	0.62275	0.056483	0.02383	0.997273	0.98	IL7R
rs12520952	35834678	G	psoriasis	8.3288e-05	0.79268	0.137741	0.4122	0.993627	1.01	IL7R
rs141421391	35834852	T	psoriasis	-0.0014321	0.50431	0.00260759	0.01056	0.981559	0.881	IL7R
rs75446396	35835414	G	psoriasis	0.0015055	0.18251	0.00955241	0.929	0.983485	1.14	IL7R
rs183036413	35835570	A	psoriasis	0.0038571	0.08937	0.00235276	0.4386	0.974854	1.41	IL7R
rs56082154	35835571	G	psoriasis	-0.0002991	0.1784	0.407161	0.5707	0.994801	0.974	IL7R
rs188063162	35835636	G	psoriasis	-0.00076858	0.68889	0.00344892	0.6066	0.934187	0.934	IL7R
rs4466190	35835849	A	psoriasis	-0.00030084	0.17585	0.407321	0.5926	0.994839	0.974	IL7R
rs62353745	35835985	C	psoriasis	-0.0002972	0.73694	0.0165267	0.4343	0.930109	0.974	IL7R
rs72742409	35836185	T	psoriasis	-0.00063434	0.70666	0.00462358	0.1367	0.905074	0.945	IL7R
rs13180666	35836386	G	psoriasis	-0.00048408	0.24034	0.0764638	0.7341	0.987149	0.958	IL7R
rs4482926	35836491	C	psoriasis	0.00031098	0.16175	0.407112	0.5949	0.994919	1.03	IL7R
rs116730223	35836551	G	psoriasis	-0.0010281	0.25619	0.01478	0.04182	genotyped	0.913	IL7R
rs79127851	35836724	C	psoriasis	0.00036685	0.19463	0.183702	0.6594	0.985659	1.03	IL7R
rs151318416	35836959	A	psoriasis	0.00036603	0.75283	0.0095901	0.3823	0.921338	1.03	IL7R
rs12697352	35837234	A	psoriasis	-0.00058623	0.010885	0.3411	0.8287	0.995115	0.949	IL7R
rs1494566	35837335	C	psoriasis	-0.00029959	0.17766	0.407199	0.5538	0.994829	0.974	IL7R
rs562209149	35838059	C	psoriasis	-0.003109	0.071941	0.00440729	0.01439	0.903771	0.76	IL7R
rs57217480	35838185	T	psoriasis	0.00031343	0.213	0.251589	0.3004	0.996788	1.03	IL7R
rs775046427	35838417	G	psoriasis	-0.00067779	0.82005	0.00145851	1	0.915849	0.942	IL7R
rs975433	35838776	T	psoriasis	-0.00024609	0.60256	0.0567367	0.01647	0.995727	0.978	IL7R
rs75843100	35838799	C	psoriasis	0.00037746	0.29551	0.09947	1.4013e-45	genotyped	1.03	IL7R
rs567200358	35838838	T	psoriasis	-0.002802	0.1939	0.00272266	0.1919	0.940409	0.781	IL7R
rs114863150	35839220	T	psoriasis	-0.00015442	0.8834	0.01087	0.6303	genotyped	0.986	IL7R
rs117602532	35839546	C	psoriasis	0.00024952	0.93668	0.00126362	0.08635	0.913833	1.02	IL7R
rs9292615	35839893	A	psoriasis	-0.00030161	0.17474	0.40731	0.5949	0.994867	0.974	IL7R
rs116347259	35839917	C	psoriasis	0.00040784	0.56391	0.0257778	0.3863	0.944211	1.04	IL7R
rs140326056	35840468	A	psoriasis	-0.00075286	0.10125	0.0605363	0.8931	0.989507	0.936	IL7R
rs66570838	35840724	A	psoriasis	8.2588e-05	0.79433	0.137771	0.4164	0.994002	1.01	IL7R
rs10075764	35841449	G	psoriasis	-0.00058282	0.011366	0.340957	0.9093	0.995406	0.95	IL7R
rs35467464	35841531	G	psoriasis	8.3378e-05	0.79241	0.137767	0.4331	0.994092	1.01	IL7R
rs13179687	35841640	G	psoriasis	-0.0016644	0.065104	0.0158713	0.05451	0.935741	0.863	IL7R
rs190616986	35842173	C	psoriasis	0.0010002	0.24462	0.0176685	0.4138	0.923922	1.09	IL7R
rs141040834	35842624	G	psoriasis	0.0015279	0.2651	0.00677581	0.07637	0.93451	1.14	IL7R
rs4521502	35842748	G	psoriasis	8.3181e-05	0.79287	0.137782	0.4416	0.994152	1.01	IL7R
rs78165162	35842785	A	psoriasis	-0.00034028	0.56993	0.0347095	0.757	0.984465	0.97	IL7R
rs4601063	35842862	G	psoriasis	8.3431e-05	0.79227	0.137781	0.4416	0.994139	1.01	IL7R
rs56133736	35842908	C	psoriasis	0.00031479	0.2111	0.251579	0.3111	0.99639	1.03	IL7R
rs62355269	35843746	C	psoriasis	0.00031496	0.21085	0.251583	0.3265	0.996372	1.03	IL7R
rs10472984	35843832	G	psoriasis	-0.00058985	0.010399	0.341102	0.8644	0.995382	0.949	IL7R
rs1073290	35843964	T	psoriasis	8.446e-05	0.78975	0.137863	0.4374	0.993797	1.01	IL7R
rs1961220	35844125	A	psoriasis	-0.0005893	0.010474	0.341076	0.8644	0.99535	0.949	IL7R
rs2172750	35844203	T	psoriasis	-0.0013652	0.52568	0.00259946	0.01068	0.977754	0.886	IL7R
rs114502687	35844869	A	psoriasis	-0.00031569	0.59994	0.0343133	0.8149	0.986548	0.972	IL7R
rs140386656	35845158	G	psoriasis	-0.0014213	0.50869	0.00259048	0.01038	0.981819	0.882	IL7R
rs180819027	35845360	A	psoriasis	0.0025941	0.15402	0.00365286	1	0.981886	1.26	IL7R
rs2885272	35845586	T	psoriasis	0.00031378	0.15804	0.406971	0.5923	0.994957	1.03	IL7R
rs6891427	35845648	G	psoriasis	-0.00030611	0.16843	0.407233	0.6196	0.99489	0.973	IL7R
rs11949736	35845834	C	psoriasis	0.00031519	0.21053	0.251574	0.3308	0.996294	1.03	IL7R
rs6892488	35846110	A	psoriasis	8.3921e-05	0.791	0.137817	0.5	0.994863	1.01	IL7R
rs62355271	35846145	A	psoriasis	0.00030435	0.22681	0.251418	0.3307	0.99577	1.03	IL7R
rs1603071	35846278	T	psoriasis	0.00031621	0.20907	0.251566	0.3263	0.996283	1.03	IL7R
rs1845482	35846551	A	psoriasis	0.00033204	0.13552	0.404531	0.7039	0.995241	1.03	IL7R
rs4594881	35846815	T	psoriasis	-0.00059386	0.0098807	0.341037	0.8794	0.995828	0.949	IL7R
rs2201408	35846928	A	psoriasis	0.00049727	0.064001	0.209813	0.1453	0.994517	1.04	IL7R
rs4370302	35847094	A	psoriasis	-0.00030502	0.16986	0.407176	0.573	0.995458	0.973	IL7R
rs1494565	35847722	T	psoriasis	-0.00030575	0.1688	0.407178	0.5851	0.995622	0.973	IL7R
rs141209410	35847749	C	psoriasis	-0.0013504	0.53025	0.00259272	0.01044	0.981584	0.887	IL7R
rs146970319	35847763	T	psoriasis	-0.0011436	0.29226	0.0110921	0.09693	0.914066	0.904	IL7R
rs116015305	35848523	G	psoriasis	-0.00050703	0.61214	0.0122522	0.5798	0.98058	0.956	IL7R
rs187815658	35848549	A	psoriasis	-0.0011777	0.32658	0.00860174	0.7547	0.964737	0.901	IL7R
rs7709291	35848563	C	psoriasis	-0.00036659	0.098088	0.415533	0.7115	0.9947	0.968	IL7R
rs75578056	35848773	G	psoriasis	-0.0013762	0.52153	0.00259255	0.0113	0.988797	0.885	IL7R
rs147855680	35848860	A	psoriasis	-0.00079573	0.43627	0.0123993	0.05104	0.921759	0.932	IL7R
rs35588638	35849159	C	psoriasis	7.073e-05	0.82289	0.138314	0.6737	0.996423	1.01	IL7R
rs2361396	35849342	T	psoriasis	0.00050621	0.059191	0.210061	0.1504	0.995329	1.05	IL7R
rs140144311	35849678	A	psoriasis	-0.00010229	0.83662	0.0512478	0.1046	0.994127	0.991	IL7R
rs146335722	35849893	A	psoriasis	-0.00082713	0.6994	0.00260672	0.01143	0.989093	0.929	IL7R
rs62355272	35849941	A	psoriasis	0.00028737	0.25011	0.256561	0.6165	0.997562	1.03	IL7R
rs75640400	35849964	T	psoriasis	-0.00093311	0.66396	0.00259524	0.01068	0.985933	0.921	IL7R
rs34463936	35850149	T	psoriasis	-0.00046042	0.057841	0.280512	0.973	0.998077	0.96	IL7R
rs6879529	35850278	A	psoriasis	-0.00035389	0.10979	0.418914	0.4901	0.997452	0.969	IL7R
rs57545288	35850629	T	psoriasis	0.00027323	0.27257	0.25918	0.7088	0.997261	1.02	IL7R
rs77636995	35850714	A	psoriasis	-0.0012819	0.54463	0.00266149	0.01396	0.982354	0.893	IL7R
rs181743004	35851089	T	psoriasis	0.0025494	0.19128	0.00328714	0.8023	0.950055	1.25	IL7R
rs12516866	35851261	T	psoriasis	-0.000369	0.095004	0.421593	0.5902	0.998538	0.968	IL7R
rs1494564	35851831	T	psoriasis	-0.00043143	0.074846	0.292168	0.98	0.978963	0.963	IL7R
rs75516268	35852129	G	psoriasis	9.1172e-05	0.93197	0.0106187	0.8691	0.990966	1.01	IL7R
rs6890853	35852311	G	psoriasis	0.00047149	0.052243	0.2812	0.3444	genotyped	1.04	IL7R
rs13188960	35853319	T	psoriasis	-0.00048977	0.043563	0.280296	0.9461	0.999209	0.958	IL7R
rs145188006	35854224	C	psoriasis	0.00010017	0.9744	0.0012741	0.0896	0.930426	1.01	IL7R
rs1494562	35854265	T	psoriasis	-0.00016034	0.49167	0.324282	0.1184	0.99882	0.986	IL7R
rs2172749	35855264	C	psoriasis	-0.00016572	0.47733	0.323963	0.1296	0.998975	0.985	IL7R
rs4869492	35855410	C	psoriasis	8.6498e-05	0.78412	0.138345	0.7157	0.99844	1.01	IL7R
rs7718919	35855996	T	psoriasis	3.8095e-05	0.90202	0.145284	0.9181	0.998434	1	IL7R
rs7701176	35856116	A	psoriasis	-0.0012549	0.29283	0.0086461	0.8365	0.97021	0.895	IL7R
rs11567685	35856575	C	psoriasis	0.0003222	0.19462	0.260569	0.9647	0.998502	1.03	IL7R
rs11567686	35856630	A	psoriasis	-0.00012197	0.60188	0.320466	0.1729	0.999433	0.989	IL7R
rs1353252	35857177	C	psoriasis	-0.00011926	0.60994	0.320416	0.1856	0.999698	0.99	IL7R
rs1353251	35857207	T	psoriasis	0.00046418	0.085365	0.206239	0.1648	0.997628	1.04	IL7R
rs1494561	35857235	G	psoriasis	-0.00011939	0.60955	0.320411	0.1856	0.999696	0.99	IL7R
rs1353250	35857262	G	psoriasis	-0.00011968	0.6087	0.320405	0.1855	0.99966	0.989	IL7R
rs11567694	35857704	G	psoriasis	-0.0004609	0.059362	0.273902	0.9419	0.999107	0.96	IL7R
rs10213865	35857850	C	psoriasis	-0.00046123	0.059177	0.273907	0.9385	0.999142	0.96	IL7R
rs11567697	35858324	G	psoriasis	-0.00046897	0.17792	0.111211	0.04662	0.994553	0.959	IL7R
rs11567698	35858343	G	psoriasis	-0.00045431	0.19185	0.111185	0.0447	0.994763	0.961	IL7R
rs1389832	35858721	G	psoriasis	-0.00012126	0.60393	0.320375	0.2031	0.999853	0.989	IL7R
rs11567699	35859011	G	psoriasis	0.00032117	0.19614	0.260286	0.9153	0.998877	1.03	IL7R
rs140646645	35859850	A	psoriasis	-0.00032057	0.86079	0.00373964	0.8222	0.951158	0.972	IL7R
rs11567701	35859863	T	psoriasis	0.0003216	0.19554	0.260281	0.9118	0.99887	1.03	IL7R
rs75007333	35860239	G	psoriasis	0.00021587	0.7292	0.0318348	0.7197	0.989681	1.02	IL7R
rs80229624	35860457	G	psoriasis	-0.0013532	0.52713	0.00259863	0.01163	0.993854	0.887	IL7R
rs1494560	35860637	G	psoriasis	-0.00011389	0.62609	0.320424	0.2145	0.999842	0.99	IL7R
rs1494559	35860767	C	psoriasis	3.9617e-05	0.89811	0.145282	0.9018	0.998823	1	IL7R
rs1494558	35861068	C	psoriasis	-0.00012288	0.59943	0.3206	0.08957	genotyped	0.989	IL7R
rs11567705	35861152	G	psoriasis	-0.00046105	0.059268	0.273899	0.9487	0.999189	0.96	IL7R
rs969128	35861159	G	psoriasis	4.0455e-05	0.89597	0.145268	0.9127	0.998864	1	IL7R
rs969129	35861268	G	psoriasis	-0.00013819	0.55566	0.316851	0.2602	0.999437	0.988	IL7R
rs77250660	35861417	A	psoriasis	-0.0014291	0.50402	0.00259331	0.01169	0.997291	0.881	IL7R
rs77392573	35861430	A	psoriasis	-0.0014212	0.50642	0.00259067	0.01169	0.997843	0.882	IL7R
rs7717955	35862841	T	psoriasis	-0.00046111	0.059283	0.273753	0.9521	0.999064	0.96	IL7R
rs11567714	35862985	T	psoriasis	-0.00045391	0.19125	0.111514	0.06111	0.996565	0.961	IL7R
rs11567715	35863003	A	psoriasis	-0.0014799	0.48714	0.00261888	0.01216	0.98722	0.877	IL7R
rs6451226	35863244	G	psoriasis	-0.00012271	0.59967	0.320412	0.2058	0.999426	0.989	IL7R
rs6893142	35863443	G	psoriasis	-0.00014146	0.54595	0.317787	0.2995	0.999724	0.988	IL7R
rs79322502	35863529	T	psoriasis	0.00080079	0.28198	0.022461	0.9347	0.956288	1.07	IL7R
rs1389831	35863805	G	psoriasis	-0.00014118	0.54675	0.317791	0.3032	0.999723	0.988	IL7R
rs1389830	35864019	C	psoriasis	-0.00014126	0.54652	0.317793	0.3032	0.999708	0.988	IL7R
rs11567719	35864424	A	psoriasis	-0.0014801	0.48709	0.00261892	0.01216	0.98742	0.877	IL7R
rs10044838	35864590	T	psoriasis	-0.00012411	0.59545	0.32057	0.1976	0.999438	0.989	IL7R
rs142961145	35865084	C	psoriasis	-0.0014211	0.50644	0.00259062	0.01169	0.997914	0.882	IL7R
rs11567722	35865160	T	psoriasis	4.1402e-05	0.89354	0.145296	0.929	0.998809	1	IL7R
rs11567723	35865194	C	psoriasis	-0.0014245	0.5037	0.00262402	0.01209	0.986434	0.882	IL7R
rs7701111	35865211	G	psoriasis	-0.00012424	0.59508	0.320568	0.1976	0.999433	0.989	IL7R
rs544750545	35865212	G	psoriasis	0.0010623	0.48269	0.00572782	0.3313	0.90441	1.1	IL7R
rs7720993	35865229	A	psoriasis	-0.00012423	0.59509	0.320569	0.1976	0.999438	0.989	IL7R
rs6451227	35865999	C	psoriasis	-0.00014308	0.54133	0.31796	0.2906	0.999685	0.987	IL7R
rs6451228	35866129	T	psoriasis	-0.00014295	0.5417	0.31795	0.2888	0.999712	0.987	IL7R
rs11567772	35866145	A	psoriasis	0.00067793	0.48752	0.0128581	0.0882	0.978249	1.06	IL7R
rs79589452	35866174	C	psoriasis	0.0012305	0.36735	0.00653532	0.2273	0.979941	1.11	IL7R
rs6451229	35866218	G	psoriasis	0.00027755	0.21102	0.405545	0.6892	0.99886	1.02	IL7R
rs6451230	35866265	C	psoriasis	-0.00014316	0.54109	0.31795	0.2888	0.999714	0.987	IL7R
rs6891095	35866322	C	psoriasis	4.583e-05	0.88225	0.14526	0.9235	0.998885	1	IL7R
rs144060230	35866365	G	psoriasis	-0.003139	0.17713	0.0023681	1	0.923872	0.758	IL7R
rs115835014	35866416	A	psoriasis	0.0010296	0.25916	0.0147056	0.206	0.983596	1.1	IL7R
rs7711268	35866696	A	psoriasis	-0.0001434	0.54042	0.317949	0.2835	0.999719	0.987	IL7R
rs7711202	35866930	G	psoriasis	-0.00014365	0.53975	0.317906	0.2835	0.999563	0.987	IL7R
rs7711208	35866938	G	psoriasis	-0.00012684	0.58741	0.320539	0.199	0.99967	0.989	IL7R
rs77795319	35867204	T	psoriasis	-0.0014169	0.50779	0.00259328	0.01209	0.996245	0.882	IL7R
rs147938694	35867785	C	psoriasis	-0.0017339	0.45387	0.00238058	0.6992	0.926328	0.858	IL7R
rs10058680	35868046	G	psoriasis	4.5734e-05	0.88249	0.145265	0.9399	0.998868	1	IL7R
rs1494557	35868056	G	psoriasis	-0.0001438	0.53929	0.31795	0.2817	0.999729	0.987	IL7R
rs77985203	35868216	G	psoriasis	-0.0014209	0.5065	0.00259054	0.01169	0.998126	0.882	IL7R
rs78625340	35868314	T	psoriasis	-0.0014213	0.50663	0.00258838	0.01169	0.997543	0.882	IL7R
rs10461959	35868352	C	psoriasis	0.00047523	0.078104	0.206355	0.1732	0.998024	1.04	IL7R
rs11567737	35868497	T	psoriasis	-0.00012601	0.58983	0.320573	0.1922	0.999426	0.989	IL7R
rs11567738	35868507	T	psoriasis	3.5897e-05	0.90746	0.146	0.8271	0.998923	1	IL7R
rs10074127	35868518	T	psoriasis	-0.0001438	0.53927	0.317949	0.2817	0.999728	0.987	IL7R
rs75399741	35868538	C	psoriasis	-0.0013894	0.51693	0.00258848	0.01099	0.992678	0.884	IL7R
rs10074095	35868669	G	psoriasis	-0.0001438	0.53929	0.31795	0.2817	0.999729	0.987	IL7R
rs1494556	35869037	A	psoriasis	-0.0001442	0.53815	0.31795	0.2817	0.999742	0.987	IL7R
rs3777090	35869359	T	psoriasis	-0.00014438	0.53764	0.31795	0.2835	0.999751	0.987	IL7R
rs11567773	35869599	T	psoriasis	0.00048021	0.83408	0.00248892	0.4816	0.908536	1.04	IL7R
rs10941267	35869818	A	psoriasis	-0.00014348	0.54018	0.317978	0.2817	0.999488	0.987	IL7R
rs76077038	35870543	A	psoriasis	-0.001379	0.52029	0.00257838	0.01143	0.997322	0.885	IL7R
rs9292616	35870588	G	psoriasis	-0.00014558	0.53424	0.317996	0.3035	0.999771	0.987	IL7R
rs10063445	35870814	C	psoriasis	-0.00014611	0.53273	0.317997	0.3073	0.999821	0.987	IL7R
rs79160514	35870868	C	psoriasis	-0.0014187	0.50734	0.00258904	0.01169	0.997992	0.882	IL7R
rs1494555	35871190	A	psoriasis	-0.00014701	0.53094	0.3179	0.08668	genotyped	0.987	IL7R
rs2228141	35871273	T	psoriasis	3.987e-05	0.89727	0.146	0.8164	0.998922	1	IL7R
rs11567774	35871541	A	psoriasis	-0.00059894	0.64866	0.00695348	0.2672	0.993936	0.948	IL7R
rs11567751	35871684	T	psoriasis	0.00033113	0.18309	0.25938	0.9858	0.998918	1.03	IL7R
rs3777089	35872123	A	psoriasis	-0.0014235	0.50577	0.00259085	0.01169	0.997809	0.882	IL7R
rs11567754	35872190	A	psoriasis	3.9764e-05	0.89754	0.145991	0.8059	0.999021	1	IL7R
rs572154665	35873085	A	psoriasis	-6.0587e-05	0.97536	0.00331455	0.5953	0.931148	0.995	IL7R
rs11567761	35873150	G	psoriasis	5.9405e-05	0.84741	0.146064	0.8271	0.999019	1.01	IL7R
rs11567762	35873201	A	psoriasis	0.00034137	0.28186	0.137617	0.9306	0.995023	1.03	IL7R
rs11567776	35873868	T	psoriasis	-0.0036625	0.27368	0.00116135	1	0.91167	0.723	IL7R
rs1494554	35873872	G	psoriasis	0.00033108	0.18307	0.25937	0.9505	0.999447	1.03	IL7R
rs6897932	35874575	C	psoriasis	0.00047019	0.054675	0.2737	0.5627	genotyped	1.04	IL7R
rs3822733	35875134	C	psoriasis	0.00033078	0.18343	0.259358	0.9505	0.999646	1.03	IL7R
rs987107	35875227	A	psoriasis	0.00033025	0.18411	0.259368	0.954	0.999755	1.03	IL7R
rs3822731	35875240	G	psoriasis	3.9434e-05	0.89837	0.145976	0.8324	0.999282	1	IL7R
rs11567777	35875500	T	psoriasis	-0.0018464	0.20962	0.00591597	0.7672	0.922405	0.849	IL7R
rs987106	35875593	T	psoriasis	-0.00012173	0.57755	0.466712	0.3875	0.999727	0.989	IL7R
rs41270321	35876251	C	psoriasis	-0.0015065	0.058092	0.0192233	0.02468	1	0.875	IL7R
rs3194051	35876274	A	psoriasis	-0.00033332	0.18026	0.2594	0.9646	genotyped	0.971	IL7R
rs2229232	35876449	C	psoriasis	4.1436e-05	0.9823	0.003399	0.000808	genotyped	1	IL7R
rs141919625	35876565	T	psoriasis	0.0016965	0.67858	0.0007126	1	genotyped	1.16	IL7R
rs145513117	35876630	G	psoriasis	-0.00090848	0.43715	0.00890498	0.6945	0.982698	0.923	IL7R
rs79286909	35877041	T	psoriasis	-0.0014191	0.50714	0.00258926	0.01169	0.998201	0.882	IL7R
rs10063294	35877505	A	psoriasis	-0.00012774	0.55893	0.466544	0.3912	0.999534	0.989	IL7R
rs9292617	35877826	T	psoriasis	-0.00014158	0.54553	0.317974	0.2766	0.999715	0.988	IL7R
rs10491434	35877914	G	psoriasis	0.00032597	0.18981	0.259477	0.9399	0.999519	1.03	IL7R
rs1494575	35878133	C	psoriasis	-0.00033777	0.91566	0.00121893	0.08317	0.946299	0.971	IL7R
rs10053847	35878140	A	psoriasis	3.9062e-05	0.89933	0.145975	0.8324	0.999237	1	IL7R
rs7716064	35878249	A	psoriasis	-0.00014158	0.54555	0.317977	0.2766	0.999713	0.988	IL7R
rs9292618	35878512	A	psoriasis	3.875e-05	0.90012	0.145979	0.8377	0.99924	1	IL7R
rs145691961	35878562	G	psoriasis	-0.0017545	0.23277	0.00593167	0.8814	0.921647	0.856	IL7R
rs6451231	35878927	C	psoriasis	-0.00015767	0.50086	0.318428	0.2597	0.998768	0.986	IL7R
rs192345351	35879001	G	psoriasis	0.00037361	0.84228	0.00354429	0.2136	0.942253	1.03	IL7R
rs6881270	35879095	T	psoriasis	-0.00047081	0.054047	0.273907	0.9385	0.999455	0.959	IL7R
rs13167136	35879135	A	psoriasis	3.853e-05	0.90069	0.145979	0.8377	0.99918	1	IL7R
rs6881706	35879156	T	psoriasis	-0.00047081	0.054047	0.273906	0.9385	0.999451	0.959	IL7R
rs1053496	35879429	C	psoriasis	0.00032473	0.19157	0.259447	0.9646	0.999262	1.03	IL7R
rs76863142	35879486	A	psoriasis	-0.001361	0.52477	0.00259824	0.01203	0.994319	0.887	IL7R
rs72742450	35879583	A	psoriasis	-0.00010911	0.80635	0.0663055	0.1164	0.96285	0.99	IL7R
rs700179	35879595	G	psoriasis	0.00032652	0.18912	0.259476	0.9399	0.999236	1.03	IL7R
rs1862632	35879603	G	psoriasis	3.8175e-05	0.90162	0.145972	0.8324	0.998952	1	IL7R
rs1862634	35879723	C	psoriasis	-0.00014223	0.5437	0.317982	0.2765	0.999649	0.988	IL7R
rs1494571	35880087	C	psoriasis	0.0003318	0.18217	0.259355	0.9681	0.999108	1.03	IL7R
rs1389835	35880242	A	psoriasis	2.6213e-05	0.93234	0.14612	0.7693	0.998406	1	IL7R
rs1389834	35880387	C	psoriasis	3.3521e-05	0.91356	0.146042	0.7849	0.998254	1	IL7R
rs77355629	35880809	T	psoriasis	-0.0011823	0.58115	0.00259557	0.01169	0.992805	0.901	IL7R
rs10058453	35880820	T	psoriasis	-0.00012805	0.58392	0.320806	0.04363	1	0.989	IL7R
rs80100820	35880825	T	psoriasis	-7.3302e-05	0.79633	0.180258	0.768	0.996276	0.994	IL7R
rs11742240	35881376	T	psoriasis	-0.00047482	0.05216	0.273901	0.9181	0.998311	0.959	IL7R
rs11742270	35881443	A	psoriasis	-0.00047502	0.052185	0.273481	0.9078	0.99837	0.959	IL7R
rs79816298	35881506	T	psoriasis	0.0003891	0.56283	0.0286207	0.5736	0.943479	1.03	IL7R
rs74483434	35881752	A	psoriasis	0.00067712	0.3608	0.0235233	0.6447	0.939273	1.06	IL7R
rs16902530	35882206	C	psoriasis	-0.0012317	0.092505	0.0231763	0.1475	0.978953	0.897	IL7R
rs6862142	35882296	G	psoriasis	-0.00040007	0.070512	0.425804	0.555	0.994056	0.965	IL7R
rs11957503	35883176	G	psoriasis	0.00025018	0.26045	0.403849	0.8985	0.996332	1.02	IL7R
rs11960511	35883241	G	psoriasis	0.00035309	0.15651	0.258802	0.9752	0.996303	1.03	IL7R
rs11954020	35883251	G	psoriasis	0.00025315	0.25486	0.403787	0.9097	0.996275	1.02	IL7R
rs182450389	35883302	A	psoriasis	-0.0020918	0.35946	0.00250024	0.09779	0.903697	0.831	IL7R
rs187133806	35883395	T	psoriasis	0.0013412	0.66017	0.00136329	1	0.928379	1.13	IL7R
rs10214237	35883734	C	psoriasis	-0.00044401	0.069318	0.275398	0.881	0.994958	0.962	IL7R
rs2194226	35883757	A	psoriasis	0.00025257	0.25607	0.403893	0.8984	0.995717	1.02	IL7R
rs2194225	35883804	C	psoriasis	0.00025224	0.25668	0.403904	0.8956	0.995708	1.02	IL7R
rs10214273	35883986	G	psoriasis	-0.00044441	0.069069	0.275401	0.8945	0.994937	0.961	IL7R
rs143439383	35884263	A	psoriasis	0.00083796	0.39856	0.0126162	0.1383	0.95457	1.08	IL7R
rs541622387	35885127	G	psoriasis	0.0036861	0.15304	0.00189613	0.6341	0.940289	1.39	IL7R
rs72742454	35885436	G	psoriasis	0.0016661	0.62244	0.00112667	1	0.918617	1.16	IL7R
rs10044883	35885710	C	psoriasis	-0.00014759	0.52951	0.317535	0.5223	0.994503	0.987	IL7R
rs113210492	35885859	G	psoriasis	-0.00012357	0.94109	0.0045889	0.2532	0.92448	0.989	IL7R
rs6871748	35885982	C	psoriasis	-0.00044774	0.067013	0.275537	0.8911	0.99458	0.961	IL7R
rs55882438	35886057	G	psoriasis	-0.00086235	0.45405	0.00974635	0.7274	0.925335	0.927	IL7R
rs77686205	35886658	A	psoriasis	-0.0011873	0.57752	0.00263311	0.01336	0.985646	0.9	IL7R
rs16899999	35886731	G	psoriasis	-6.871e-05	0.82473	0.14497	0.486	0.995546	0.994	IL7R
rs75299598	35886779	G	psoriasis	-0.0011842	0.57858	0.00263521	0.01336	0.985067	0.901	IL7R
rs1423657	35887290	C	psoriasis	-0.00038092	0.23144	0.13692	0.7042	0.990623	0.967	IL7R
rs13172065	35887454	G	psoriasis	-6.8154e-05	0.82612	0.144983	0.486	0.995426	0.994	IL7R
rs1423658	35887640	A	psoriasis	0.00038355	0.22834	0.136843	0.7314	0.990834	1.03	IL7R
rs10043573	35887666	A	psoriasis	-6.7983e-05	0.82655	0.14498	0.4818	0.995511	0.994	IL7R
rs67207043	35888203	A	psoriasis	0.00037016	0.13749	0.259047	0.9609	0.995173	1.03	IL7R
rs4141646	35888390	A	psoriasis	0.00038325	0.22867	0.136878	0.7041	0.990704	1.03	IL7R
rs6888699	35888934	C	psoriasis	-6.2997e-05	0.83919	0.144875	0.4903	0.994836	0.994	IL7R
rs77461022	35889192	T	psoriasis	-0.00068145	0.056515	0.105598	0.2003	0.985931	0.942	IL7R
rs186255329	35889226	T	psoriasis	0.0056744	0.0044905	0.00317991	0.7733	0.935392	1.65	IL7R
rs16902536	35889678	T	psoriasis	-0.00085418	0.38009	0.0132605	0.04452	0.944817	0.927	IL7R
rs13154973	35889706	C	psoriasis	-6.6754e-05	0.82963	0.144995	0.4818	0.995515	0.994	IL7R
rs75667000	35890052	T	psoriasis	-8.0783e-05	0.77595	0.180864	0.5289	0.994401	0.993	IL7R
rs148476011	35890373	G	psoriasis	-0.00061682	0.48149	0.01634	0.5201	0.959191	0.947	IL7R
rs62351973	35890613	T	psoriasis	0.00037693	0.13068	0.258822	0.8971	0.994241	1.03	IL7R
rs184997073	35891251	A	psoriasis	0.0028635	0.27214	0.00190817	1	0.911097	1.29	IL7R
rs10070378	35891254	A	psoriasis	-6.3275e-05	0.83821	0.145284	0.519	0.996077	0.994	IL7R
rs75690688	35891336	T	psoriasis	0.00054043	0.20936	0.069116	0.3431	0.993881	1.05	IL7R
rs13169780	35891907	C	psoriasis	-6.5265e-05	0.83328	0.144985	0.492	0.996977	0.994	IL7R
rs13169814	35891960	G	psoriasis	-6.8812e-05	0.82423	0.145235	0.519	0.997002	0.994	IL7R
rs62351974	35892037	T	psoriasis	-0.00052701	0.028746	0.289509	0.5974	0.992264	0.954	IL7R
rs149006892	35892207	T	psoriasis	-0.00052984	0.58304	0.0137819	0.3643	0.928211	0.954	IL7R
rs62351975	35892290	C	psoriasis	-0.00053728	0.025728	0.289889	0.6595	0.992123	0.954	IL7R
rs13170810	35892372	A	psoriasis	-5.9441e-05	0.85225	0.135197	0.5851	0.997738	0.995	IL7R
rs564839103	35893331	G	psoriasis	-0.0018866	0.57534	0.00114939	0.05137	0.906111	0.846	IL7R
rs4869430	35893338	T	psoriasis	-1.7706e-05	0.95572	0.135449	0.4805	0.998323	0.998	IL7R
rs12658443	35893423	G	psoriasis	-0.00055632	0.021287	0.287214	0.5065	0.992005	0.952	IL7R
rs12658494	35893499	T	psoriasis	-0.00053808	0.026169	0.285618	0.6239	0.991947	0.954	IL7R
rs12055232	35893559	T	psoriasis	0.00041552	0.16508	0.159288	0.2138	0.985843	1.04	IL7R
rs10059688	35893746	A	psoriasis	5.6416e-05	0.8596	0.1358	0.1327	genotyped	1	IL7R
rs11949691	35894224	C	psoriasis	0.00042407	0.10004	0.234409	0.8978	0.993405	1.04	IL7R
rs6870944	35894541	A	psoriasis	-0.00030431	0.30239	0.164524	0.3796	0.989633	0.973	IL7R
rs10056484	35895099	A	psoriasis	-1.7101e-05	0.95722	0.13535	0.5126	0.999512	0.998	IL7R
rs75521193	35895673	C	psoriasis	-0.00098726	0.64732	0.00258843	0.01056	0.975647	0.916	IL7R
rs2303137	35895725	T	psoriasis	-0.00030393	0.16707	0.433379	0.2512	0.996849	0.973	IL7R
rs116269315	35895782	G	psoriasis	-0.00019255	0.78218	0.0250429	0.1758	1	0.983	IL7R
rs115543657	35895783	G	psoriasis	-0.0001206	0.86419	0.0244863	0.5227	0.998585	0.989	IL7R
rs10472989	35896758	T	psoriasis	-8.0514e-06	0.97985	0.135456	0.4762	0.999141	0.999	IL7R
rs6451234	35896984	A	psoriasis	5.1937e-05	0.86947	0.13832	0.6936	0.996949	1	IL7R
rs75235037	35897136	A	psoriasis	-0.0010512	0.62602	0.00258141	0.0102	0.978577	0.911	IL7R
rs77894047	35897685	T	psoriasis	-3.4295e-05	0.90365	0.181352	0.3304	0.995901	0.997	IL7R
rs7727750	35897933	G	psoriasis	-5.0218e-07	0.99875	0.134466	0.413	0.995533	1	IL7R
rs7710177	35897939	G	psoriasis	-1.3964e-05	0.96507	0.135352	0.5127	0.998916	0.999	IL7R
rs10472990	35898028	G	psoriasis	-1.3739e-05	0.96563	0.135362	0.5034	0.999136	0.999	IL7R
rs555414048	35898098	T	psoriasis	-0.00012825	0.96812	0.00121055	0.07637	0.939965	0.989	IL7R
rs12153578	35898259	A	psoriasis	-0.00029914	0.17381	0.433171	0.2056	0.99678	0.974	IL7R
rs10472264	35898419	A	psoriasis	-1.4222e-05	0.96442	0.135367	0.4988	0.999059	0.999	IL7R
rs17376481	35898876	A	psoriasis	0.0003247	0.14064	0.42853	0.8399	0.996931	1.03	IL7R
rs34035059	35898976	CT	psoriasis	-0.00039696	0.50842	0.03417	0.4125	genotyped	0.966	IL7R
rs990716	35899264	C	psoriasis	0.00045108	0.074726	0.246947	0.9744	0.995723	1.04	IL7R
rs78341107	35899372	A	psoriasis	-3.4166e-05	0.90397	0.181478	0.3193	0.996177	0.997	IL7R
rs111280147	35899776	G	psoriasis	0.00048971	0.60179	0.0136546	0.1605	1	1.04	IL7R
rs2161552	35901132	T	psoriasis	0.00034056	0.12132	0.437898	0.3008	0.996011	1.03	IL7R
rs182158522	35901831	G	psoriasis	-0.00017039	0.79967	0.0271	0.7479	genotyped	0.985	IL7R
rs1025039	35901857	T	psoriasis	0.00032581	0.13907	0.428883	0.7566	0.99768	1.03	IL7R
rs79581553	35902496	T	psoriasis	-0.0010003	0.64288	0.00259384	0.01026	0.973896	0.915	IL7R
rs13162685	35903036	T	psoriasis	5.4565e-06	0.98637	0.135019	0.5071	0.99754	1	IL7R
rs77283181	35903469	A	psoriasis	-3.8442e-05	0.89202	0.181396	0.3569	0.996714	0.997	IL7R
rs2287900	35903997	T	psoriasis	0.00044317	0.079622	0.247608	0.9744	0.995529	1.04	IL7R
rs1833907	35904614	T	psoriasis	0.00045503	0.071842	0.24769	0.9744	0.99613	1.04	IL7R
rs1345827	35904889	A	psoriasis	0.00032103	0.14492	0.429119	0.7593	0.997812	1.03	IL7R
rs2361403	35905211	T	psoriasis	0.00032106	0.14488	0.429118	0.7566	0.997813	1.03	IL7R
rs186920247	35905774	A	psoriasis	-0.00082763	0.67491	0.00330324	0.1677	0.921937	0.929	IL7R
rs1008756	35905927	C	psoriasis	0.00031869	0.14785	0.429197	0.7461	0.997965	1.03	IL7R
rs755774799	35906220	T	psoriasis	0.00034161	0.90268	0.00158563	1	0.957968	1.03	IL7R
rs12522083	35906234	G	psoriasis	-0.000303	0.16805	0.432873	0.1806	0.998214	0.974	IL7R
rs79846611	35906314	G	psoriasis	-0.0010234	0.63582	0.00257687	0.009854	0.977963	0.913	IL7R
rs6451236	35906359	G	psoriasis	-1.4715e-05	0.96326	0.135039	0.4841	0.997421	0.999	IL7R
rs852253	35906488	T	psoriasis	0.00022317	0.46321	0.152003	0.4536	0.99347	1.02	IL7R
rs860416	35906981	T	psoriasis	0.00022186	0.46587	0.151993	0.4617	0.993416	1.02	IL7R
rs16902573	35907372	T	psoriasis	0.00044326	0.079533	0.247604	0.9525	0.995724	1.04	IL7R
rs77573968	35907408	T	psoriasis	-3.8526e-05	0.89177	0.181411	0.3449	0.996983	0.997	IL7R
rs72742468	35907468	T	psoriasis	0.0016601	0.63736	0.00104635	1	0.913486	1.16	IL7R
rs116548044	35907529	G	psoriasis	-4.2233e-05	0.96937	0.0100703	0.4861	0.982219	0.996	IL7R
rs116114453	35907790	A	psoriasis	-9.851e-05	0.9627	0.00281309	0.2274	0.951784	0.991	IL7R
rs568814823	35908001	A	psoriasis	-0.0012885	0.62738	0.00186964	1	0.900064	0.892	IL7R
rs984164	35908015	T	psoriasis	0.0003191	0.14724	0.429214	0.7225	0.99851	1.03	IL7R
rs35221690	35908025	A	psoriasis	-0.00035953	0.79459	0.00640289	0.4203	0.978047	0.969	IL7R
rs1010601	35908204	C	psoriasis	0.00031918	0.14714	0.429214	0.7199	0.998536	1.03	IL7R
rs1010600	35908295	T	psoriasis	-0.00031274	0.15465	0.432844	0.184	0.999057	0.973	IL7R
rs148971652	35908465	G	psoriasis	0.0014782	0.63179	0.00134392	1	0.923352	1.14	IL7R
rs1010599	35908474	G	psoriasis	0.00032101	0.14485	0.429146	0.7382	0.998384	1.03	IL7R
rs115727000	35908610	G	psoriasis	-0.00069315	0.10594	0.06949	0.7612	genotyped	0.941	IL7R
rs116630600	35910308	C	psoriasis	-0.00013701	0.8634	0.01911	0.8199	genotyped	0.988	IL7R
rs2287899	35910337	C	psoriasis	-0.0011774	0.58796	0.00255506	0.008658	0.974817	0.901	IL7R
rs1445899	35910419	T	psoriasis	-0.00032627	0.1372	0.435764	0.2164	0.999902	0.972	IL7R
rs1445898	35910529	C	psoriasis	0.00033508	0.12772	0.4356	0.8921	genotyped	1.03	IL7R
rs1445897	35910908	G	psoriasis	-0.00032616	0.13733	0.43576	0.2151	0.999841	0.972	IL7R
rs59030624	35910951	G	psoriasis	0.0003221	0.14348	0.429143	0.7251	0.998369	1.03	IL7R
rs55654952	35911179	G	psoriasis	0.00045596	0.071185	0.24781	0.9781	0.996529	1.04	IL7R
rs700178	35911215	A	psoriasis	0.00042583	0.47939	0.0346513	0.6133	0.963992	1.04	IL7R
rs184603261	35911247	G	psoriasis	0.0036025	0.092903	0.00265894	1	0.968698	1.38	IL7R
rs7445819	35911309	C	psoriasis	-1.7566e-05	0.95615	0.13502	0.4933	0.997	0.998	IL7R
rs189299056	35911895	A	psoriasis	-0.001271	0.52967	0.00317083	1	0.916379	0.894	IL7R
rs7381111	35911967	T	psoriasis	-0.00031525	0.15131	0.433227	0.1959	0.999482	0.973	IL7R
rs7381123	35912172	G	psoriasis	-1.5729e-05	0.96073	0.13506	0.4797	0.996932	0.999	IL7R
rs144674401	35912180	T	psoriasis	-0.00032291	0.88038	0.00268421	0.01045	0.96142	0.972	IL7R
rs147909677	35912284	A	psoriasis	0.0006595	0.40554	0.0199257	0.2186	0.965382	1.06	IL7R
rs10077384	35912746	G	psoriasis	-0.00031443	0.1524	0.433204	0.1935	0.99943	0.973	IL7R
rs116695476	35913067	C	psoriasis	-3.7696e-05	0.89408	0.181403	0.3508	0.997216	0.997	IL7R
rs6878688	35913524	A	psoriasis	0.0003223	0.14325	0.429215	0.7514	0.998332	1.03	IL7R
rs7719334	35913996	A	psoriasis	0.00032005	0.14605	0.429293	0.7382	0.998423	1.03	IL7R
rs7705615	35914338	G	psoriasis	0.00045686	0.070646	0.247779	0.9744	0.996518	1.04	IL7R
rs184920245	35915221	G	psoriasis	-3.8383e-05	0.89216	0.181413	0.3509	0.99716	0.997	IL7R
rs149139078	35915250	G	psoriasis	0.00049751	0.46002	0.0279244	0.5498	0.963285	1.04	IL7R
rs145425876	35915921	T	psoriasis	-3.8411e-05	0.89208	0.181412	0.3508	0.997041	0.997	IL7R
rs189589433	35917778	C	psoriasis	-0.0016403	0.17704	0.00898324	0.3111	0.90038	0.865	IL7R
rs7702828	35917934	A	psoriasis	0.00045598	0.071195	0.247777	0.9671	0.996462	1.04	IL7R
rs7702587	35917983	T	psoriasis	0.00029287	0.18331	0.432146	0.5268	0.996791	1.03	IL7R
rs34442743	35918183	G	psoriasis	-0.0003273	0.136	0.435689	0.2112	0.999628	0.971	IL7R
rs72742471	35918207	A	psoriasis	0.00031859	0.14794	0.429292	0.7514	0.998161	1.03	IL7R
rs140126791	35918509	G	psoriasis	-0.0016686	0.2615	0.00568548	0.7372	0.938409	0.863	IL7R
rs117516649	35918698	A	psoriasis	-0.0011357	0.60364	0.00252015	0.00782	0.976131	0.904	IL7R
rs3866449	35919343	T	psoriasis	0.00042079	0.094322	0.253019	0.9388	0.992733	1.04	IL7R
rs3866450	35919378	G	psoriasis	-0.00032727	0.13604	0.435758	0.2125	0.999605	0.971	IL7R
rs4024109	35919618	C	psoriasis	0.00032493	0.1401	0.429178	0.7806	0.998015	1.03	IL7R
rs4024110	35919651	T	psoriasis	0.00046271	0.067225	0.247658	0.938	0.995963	1.04	IL7R
rs116776788	35919669	A	psoriasis	0.00098004	0.039736	0.0558222	0.3406	0.98932	1.09	IL7R
rs6873195	35919917	A	psoriasis	0.0003227	0.14302	0.429205	0.7408	0.996827	1.03	IL7R
rs80039231	35920067	A	psoriasis	-0.0011921	0.58527	0.00253407	0.007914	0.973303	0.9	IL7R
rs140399125	35920206	A	psoriasis	-0.0019299	0.20265	0.0055074	0.6009	0.931769	0.843	IL7R
rs17311549	35920258	C	psoriasis	-2.481e-05	0.93024	0.181441	0.3508	0.994647	0.998	IL7R
rs145601378	35920419	C	psoriasis	-0.002761	0.18316	0.00295091	0.541	0.937012	0.783	IL7R
rs852252	35920552	C	psoriasis	0.00017243	0.57011	0.153008	0.4364	0.99112	1.02	IL7R
rs11955657	35920564	A	psoriasis	0.00034642	0.11632	0.428165	0.8072	0.994928	1.03	IL7R
rs11955690	35920686	T	psoriasis	0.00034685	0.11586	0.428152	0.8045	0.994943	1.03	IL7R
rs6859892	35921069	C	psoriasis	-2.6404e-05	0.93423	0.134959	0.5014	0.994138	0.998	IL7R
rs3734107	35921266	A	psoriasis	0.0003468	0.11594	0.428196	0.7937	0.994749	1.03	IL7R
rs860415	35922060	G	psoriasis	0.00044145	0.046371	0.418919	0.7202	0.992377	1.04	IL7R
rs11950831	35922070	G	psoriasis	0.00048237	0.057033	0.246902	0.9487	0.992804	1.04	IL7R
rs860414	35922140	A	psoriasis	0.00017215	0.57076	0.153007	0.4403	0.991037	1.02	IL7R
rs538981299	35922236	G	psoriasis	-0.0016526	0.41773	0.00301426	0.1444	0.945565	0.864	IL7R
rs77185068	35922351	A	psoriasis	-0.0011435	0.60109	0.0025409	0.007819	0.967458	0.904	IL7R
rs852251	35922462	A	psoriasis	0.00017201	0.57107	0.153007	0.4403	0.991007	1.02	IL7R
rs863781	35922799	A	psoriasis	0.00017221	0.5706	0.153017	0.4403	0.991064	1.02	IL7R
rs852250	35922940	C	psoriasis	0.00044106	0.046579	0.418907	0.7097	0.992305	1.04	IL7R
rs852249	35923014	A	psoriasis	0.00044116	0.046526	0.418906	0.7097	0.992306	1.04	IL7R
rs852248	35923055	A	psoriasis	0.00044014	0.047033	0.4189	0.707	0.992326	1.04	IL7R
rs74440139	35923103	A	psoriasis	-0.0011558	0.5977	0.00253435	0.007772	0.969449	0.903	IL7R
rs852247	35923114	G	psoriasis	0.0004412	0.046507	0.41891	0.7123	0.992308	1.04	IL7R
rs77462793	35923214	T	psoriasis	-0.0011477	0.59961	0.00254587	0.008107	0.9678	0.904	IL7R
rs852246	35923229	T	psoriasis	0.00017145	0.57229	0.153028	0.4364	0.991068	1.02	IL7R
rs1645181	35923382	T	psoriasis	0.00030845	0.33451	0.141765	0.9315	0.954719	1.03	IL7R
rs1645180	35923383	G	psoriasis	0.00031057	0.33132	0.14171	0.9258	0.954409	1.03	IL7R
rs10941268	35923689	A	psoriasis	-3.0424e-05	0.91455	0.181329	0.3388	0.994296	0.997	IL7R
rs6451239	35924091	G	psoriasis	-1.2908e-05	0.96784	0.134785	0.5339	0.993757	0.999	IL7R
rs10054418	35924309	C	psoriasis	1.907e-05	0.95259	0.134339	0.5185	0.99319	1	IL7R
rs6871116	35924748	C	psoriasis	0.00047762	0.059703	0.246826	0.9485	0.991377	1.04	IL7R
rs852242	35925214	T	psoriasis	0.00038107	0.083131	0.463281	0.6984	0.982128	1.03	IL7R
rs6897339	35925282	C	psoriasis	0.00070886	0.08325	0.0779006	0.9426	0.985576	1.06	IL7R
rs115508026	35925660	A	psoriasis	0.00047057	0.53895	0.02075	0.7675	genotyped	1.04	IL7R
rs145580417	35925678	A	psoriasis	-0.0014748	0.29866	0.00646318	0.4793	0.908292	0.878	IL7R
rs56349546	35925854	T	psoriasis	-0.00047406	0.672	0.0100532	0.7364	0.949542	0.959	IL7R
rs112028335	35925931	T	psoriasis	-5.6372e-07	0.99842	0.180864	0.4077	0.992451	1	IL7R
rs7716969	35926017	G	psoriasis	-0.00035882	0.10362	0.436479	0.7968	0.990874	0.969	IL7R
rs141981469	35926134	T	psoriasis	0.00058737	0.19009	0.0664017	0.4535	0.952006	1.05	IL7R
rs16902614	35926216	A	psoriasis	-0.0011706	0.58417	0.00268064	0.01106	0.951613	0.902	IL7R
rs11948151	35926341	T	psoriasis	0.00029977	0.19232	0.343057	0.8708	0.995517	1.03	IL7R
rs183125514	35926743	C	psoriasis	0.00010863	0.95553	0.00342189	0.619	0.916269	1.01	IL7R
rs138912305	35926774	C	psoriasis	-0.00047639	0.67622	0.0093225	0.3664	0.98552	0.959	IL7R
rs80069296	35926821	G	psoriasis	0.0013228	0.15057	0.0144736	0.3696	0.981805	1.12	IL7R
rs7722700	35927166	T	psoriasis	0.000329	0.21193	0.220241	0.4273	0.996468	1.03	IL7R
rs7726563	35927258	C	psoriasis	0.00034785	0.18674	0.220336	0.4132	0.99668	1.03	IL7R
rs75159651	35927309	T	psoriasis	0.00064728	0.21467	0.0461063	0.3118	0.991234	1.06	IL7R
rs7726969	35927321	A	psoriasis	0.00035198	0.18161	0.220265	0.4217	0.996711	1.03	IL7R
rs192706592	35927791	G	psoriasis	-0.00046523	0.68275	0.00934576	0.3665	0.987225	0.96	IL7R
rs184313374	35927946	T	psoriasis	0.0046743	0.12161	0.00137356	1	0.949589	1.51	IL7R
rs696734	35928508	T	psoriasis	-0.00054316	0.026121	0.276618	0.6418	0.995093	0.953	IL7R
rs145743068	35929548	A	psoriasis	-0.0010057	0.64361	0.00257967	0.009296	0.964442	0.915	IL7R
rs4472285	35929829	T	psoriasis	-0.00024049	0.73549	0.02402	0.401	genotyped	0.979	IL7R
rs75004612	35930461	G	psoriasis	-0.00097868	0.65504	0.00253433	0.008557	0.965843	0.917	IL7R
rs700176	35930703	T	psoriasis	0.00039528	0.074333	0.4175	0.749	0.994941	1.04	IL7R
rs78265534	35930859	A	psoriasis	-1.8794e-05	0.94718	0.180974	0.3466	0.994975	0.998	IL7R
rs700175	35930917	T	psoriasis	0.00021775	0.42	0.206374	0.522	0.993715	1.02	IL7R
rs7301615	9735629	G	psoriasis	-8.1828e-05	0.71214	0.405573	0.2396	0.997943	0.993	KLRB1
rs10771901	9735686	T	psoriasis	8.2981e-05	0.70834	0.404953	0.2422	0.998312	1.01	KLRB1
rs142868837	9735802	A	psoriasis	-0.0020688	0.26694	0.00371109	0.8072	0.920245	0.833	KLRB1
rs7301928	9735848	T	psoriasis	-0.00051208	0.027726	0.324817	0.8305	0.997903	0.956	KLRB1
rs7301948	9735894	T	psoriasis	-0.00051217	0.027692	0.324828	0.8366	0.998008	0.956	KLRB1
rs147302648	9736232	G	psoriasis	0.0003221	0.81711	0.0061692	0.6786	0.996322	1.03	KLRB1
rs7956739	9736279	G	psoriasis	0.00037222	0.24778	0.131799	0.4394	0.998233	1.03	KLRB1
rs61108228	9736478	A	psoriasis	0.00032599	0.39384	0.089306	0.6076	0.996686	1.03	KLRB1
rs539031657	9736543	A	psoriasis	0.0004727	0.80291	0.00341922	0.4387	0.965494	1.04	KLRB1
rs7306188	9736798	T	psoriasis	-0.00035488	0.26962	0.13237	0.4586	0.99857	0.969	KLRB1
rs7305404	9736899	A	psoriasis	-0.00035643	0.26756	0.132349	0.4631	0.998487	0.969	KLRB1
rs7306340	9736913	T	psoriasis	0.00044354	0.41093	0.0427789	0.1757	0.995509	1.04	KLRB1
rs2191964	9737238	G	psoriasis	-0.00035638	0.2676	0.132353	0.4631	0.998643	0.969	KLRB1
rs145525088	9737600	G	psoriasis	-0.00080035	0.26468	0.0251967	0.7444	0.935185	0.932	KLRB1
rs6488025	9737718	C	psoriasis	-0.00035637	0.26757	0.132355	0.4631	0.998887	0.969	KLRB1
rs6488026	9737858	A	psoriasis	-0.00035649	0.2674	0.132356	0.4631	0.998962	0.969	KLRB1
rs1159189	9738070	C	psoriasis	-0.00035634	0.26758	0.132357	0.4631	0.999088	0.969	KLRB1
rs4763617	9738343	G	psoriasis	-0.00036714	0.25348	0.132252	0.4583	0.999259	0.968	KLRB1
rs4763620	9738806	A	psoriasis	-0.0003673	0.25322	0.132252	0.4538	0.999562	0.968	KLRB1
rs10743776	9738849	T	psoriasis	-0.00036363	0.25793	0.132287	0.4318	0.999603	0.968	KLRB1
rs7313960	9738901	A	psoriasis	-0.00036244	0.25948	0.132321	0.4319	0.999455	0.968	KLRB1
rs4140910	9738992	A	psoriasis	-0.00037451	0.24457	0.1327	0.4111	genotyped	0.967	KLRB1
rs10844110	9739768	G	psoriasis	8.5122e-05	0.70042	0.411075	0.442	0.999559	1.01	KLRB1
rs6488031	9739885	A	psoriasis	-0.00021012	0.33597	0.4967	0.2159	genotyped	0.982	KLRB1
rs7955007	9739997	A	psoriasis	-0.000204	0.34911	0.49717	0.913	0.998907	0.982	KLRB1
rs758964	9740067	T	psoriasis	-0.00025293	0.57562	0.0619661	0.5848	0.998931	0.978	KLRB1
rs758963	9740254	A	psoriasis	-0.00025213	0.57682	0.0619661	0.5848	0.998994	0.978	KLRB1
rs118174618	9740283	G	psoriasis	0.0048825	0.011639	0.00334308	1	0.949292	1.54	KLRB1
rs12314581	9740553	C	psoriasis	0.00034408	0.53469	0.0403885	0.1299	0.997125	1.03	KLRB1
rs7137213	9740839	A	psoriasis	-0.00026381	0.22758	0.456721	0.8825	0.99932	0.977	KLRB1
rs4763237	9741378	A	psoriasis	-0.00024249	0.59135	0.0620055	0.6055	0.998987	0.979	KLRB1
rs4763630	9741500	A	psoriasis	-8.915e-05	0.68787	0.411	0.326	genotyped	0.992	KLRB1
rs2888922	9742161	A	psoriasis	-0.00052246	0.024742	0.32438	0.9255	0.998609	0.955	KLRB1
rs2374766	9742288	G	psoriasis	-0.0003414	0.44902	0.0625728	0.7798	0.992153	0.97	KLRB1
rs146914931	9742327	T	psoriasis	0.00015084	0.849	0.0200937	0.6648	0.957638	1.01	KLRB1
rs12579453	9742446	A	psoriasis	8.3154e-05	0.70701	0.411318	0.5257	0.99974	1.01	KLRB1
rs2191963	9743003	G	psoriasis	-0.00028005	0.53527	0.0619781	0.6794	0.999209	0.976	KLRB1
rs2374767	9743058	G	psoriasis	-0.00027998	0.53538	0.0619789	0.6794	0.999196	0.976	KLRB1
rs118134021	9743238	C	psoriasis	-0.00054189	0.44981	0.02353	0.00148	genotyped	0.953	KLRB1
rs372465368	9743242	G	psoriasis	-0.0016214	0.34669	0.00419547	0.8276	0.954164	0.866	KLRB1
rs16925540	9743286	C	psoriasis	0.00029751	0.51204	0.0613823	0.8119	0.998688	1.03	KLRB1
rs118044466	9743473	G	psoriasis	0.000625	0.38557	0.023363	0.2868	0.999786	1.06	KLRB1
rs12300846	9743484	A	psoriasis	0.00015066	0.50793	0.36066	0.5451	0.990184	1.01	KLRB1
rs7307684	9743527	G	psoriasis	-0.00026726	0.55421	0.0619483	0.712	0.998557	0.977	KLRB1
rs7310864	9743548	C	psoriasis	-0.00028152	0.53317	0.0619729	0.6902	0.999113	0.975	KLRB1
rs115053517	9743651	A	psoriasis	0.00090098	0.36292	0.0135608	0.226	0.901693	1.08	KLRB1
rs10743778	9743656	G	psoriasis	-0.00028377	0.52993	0.0619609	0.7011	0.999112	0.975	KLRB1
rs10743779	9743799	T	psoriasis	-0.00028364	0.53011	0.0619608	0.7011	0.999092	0.975	KLRB1
rs7308112	9743924	C	psoriasis	-0.00028327	0.53066	0.061961	0.7011	0.999072	0.975	KLRB1
rs148131077	9744173	G	psoriasis	0.00033378	0.81058	0.00616696	0.678	0.99728	1.03	KLRB1
rs118173216	9744411	T	psoriasis	0.00064241	0.37288	0.0233327	0.339	0.998996	1.06	KLRB1
rs4542498	9744563	C	psoriasis	0.00020291	0.69956	0.04503	0.9521	genotyped	1.02	KLRB1
rs61913638	9744627	C	psoriasis	2.3931e-05	0.97611	0.01892	0.9274	genotyped	1	KLRB1
rs116946902	9744814	G	psoriasis	0.00062656	0.38449	0.0233614	0.2868	0.999127	1.06	KLRB1
rs10734801	9745088	G	psoriasis	-0.00028328	0.53159	0.0616858	0.7555	0.997072	0.975	KLRB1
rs4763633	9745396	G	psoriasis	-0.00052377	0.024457	0.324294	0.9348	0.997664	0.955	KLRB1
rs4763635	9745571	G	psoriasis	-0.00022286	0.30661	0.497044	0.8244	0.998408	0.98	KLRB1
rs10844135	9745606	A	psoriasis	0.0001556	0.4789	0.434859	0.7705	0.998485	1.01	KLRB1
rs10771915	9745747	T	psoriasis	0.00015016	0.49442	0.434784	0.7625	0.998522	1.01	KLRB1
rs7300793	9745823	A	psoriasis	0.00039391	0.22129	0.132155	0.4399	0.996374	1.04	KLRB1
rs10743780	9745878	C	psoriasis	0.00014991	0.49514	0.434778	0.7599	0.998447	1.01	KLRB1
rs151060196	9745916	G	psoriasis	0.0006461	0.37029	0.0233279	0.357	0.99853	1.06	KLRB1
rs117078774	9745917	T	psoriasis	-0.00069641	0.43413	0.01681	0.3165	0.900111	0.94	KLRB1
rs10743781	9745970	C	psoriasis	-0.00041166	0.27647	0.0912772	0.9263	0.997056	0.964	KLRB1
rs10771916	9746077	A	psoriasis	8.3788e-05	0.70507	0.411237	0.5774	0.998497	1.01	KLRB1
rs10743782	9746097	T	psoriasis	8.374e-05	0.70523	0.411239	0.5822	0.99849	1.01	KLRB1
rs10771918	9746600	C	psoriasis	-0.0002172	0.31911	0.497132	0.7584	0.998061	0.981	KLRB1
rs10771919	9746614	T	psoriasis	8.3655e-05	0.70552	0.41134	0.6438	0.998392	1.01	KLRB1
rs10771920	9747075	A	psoriasis	8.7172e-05	0.69376	0.411595	0.6489	0.998131	1.01	KLRB1
rs7297002	9747102	C	psoriasis	-0.00038202	0.32721	0.0853469	0.7023	0.998539	0.967	KLRB1
rs10844140	9747288	T	psoriasis	9.7135e-05	0.66084	0.411737	0.6719	0.998158	1.01	KLRB1
rs192134144	9747356	T	psoriasis	0.00061921	0.38911	0.0235225	0.3416	0.996519	1.06	KLRB1
rs10844141	9747361	A	psoriasis	0.00012796	0.55811	0.47559	0.7942	0.994874	1.01	KLRB1
rs2058429	9747466	C	psoriasis	-0.00041062	0.20299	0.1317	0.521	genotyped	0.964	KLRB1
rs2058427	9747557	A	psoriasis	-0.00018347	0.40012	0.496147	0.8083	0.997279	0.984	KLRB1
rs2058426	9747676	A	psoriasis	-0.00013555	0.53404	0.496448	1	0.997404	0.988	KLRB1
rs112483119	9747727	G	psoriasis	6.0253e-06	0.9944	0.0163791	0.05828	0.996464	1	KLRB1
rs2241006	9748209	A	psoriasis	8.3552e-05	0.70581	0.411576	0.7403	0.998956	1.01	KLRB1
rs1468674	9748282	C	psoriasis	-0.00019712	0.37112	0.481479	0.6175	0.974662	0.983	KLRB1
rs9988997	9748446	C	psoriasis	0.00042592	0.43628	0.0414277	0.09288	0.998629	1.04	KLRB1
rs2241005	9748572	C	psoriasis	-0.00013979	0.52118	0.495614	0.8645	0.998908	0.988	KLRB1
rs145946875	9748748	A	psoriasis	0.00029153	0.83386	0.00619132	0.5844	0.99811	1.03	KLRB1
rs2058425	9748766	G	psoriasis	-0.00020361	0.61669	0.0778486	0.775	0.998198	0.982	KLRB1
rs118117973	9748867	G	psoriasis	0.00039002	0.48197	0.0402312	0.209	0.997751	1.04	KLRB1
rs11834004	9749087	G	psoriasis	0.00041679	0.44797	0.041086	0.1235	0.998199	1.04	KLRB1
rs118028260	9749208	G	psoriasis	6.4984e-06	0.99396	0.016367	0.05825	0.995369	1	KLRB1
rs150796627	9749354	T	psoriasis	0.00022617	0.87033	0.00622733	0.585	0.997761	1.02	KLRB1
rs4763239	9749421	C	psoriasis	7.4272e-05	0.73714	0.411649	0.743	0.99948	1.01	KLRB1
rs61913639	9749496	A	psoriasis	0.00031578	0.4058	0.0938313	2.591e-06	0.966815	1.03	KLRB1
rs4763240	9749535	T	psoriasis	8.13e-05	0.71332	0.411595	0.7617	0.999531	1.01	KLRB1
rs985913	9749543	A	psoriasis	-0.00034444	0.12991	0.358806	0.603	0.995923	0.97	KLRB1
rs985912	9749682	C	psoriasis	-0.00013937	0.52241	0.495647	0.8645	0.999121	0.988	KLRB1
rs985911	9749726	T	psoriasis	-0.00014029	0.51967	0.495659	0.8671	0.999149	0.988	KLRB1
rs1135816	9750669	A	psoriasis	-7.0931e-05	0.74921	0.4129	0.5023	genotyped	0.994	KLRB1
rs10734802	9750965	C	psoriasis	-0.00025708	0.57086	0.06152	0.7104	genotyped	0.978	KLRB1
rs34919993	9751127	T	psoriasis	0.00029967	0.95033	0.0005137	1	genotyped	1.03	KLRB1
rs141057839	9751202	C	psoriasis	-0.0002223	0.87245	0.006237	0.5852	genotyped	0.981	KLRB1
rs527650904	9751620	G	psoriasis	-5.0304e-05	0.97876	0.0036418	0.5011	0.914161	0.996	KLRB1
rs11051841	9752011	A	psoriasis	0.0004145	0.45044	0.0410889	0.1235	0.998212	1.04	KLRB1
rs144638195	9752035	G	psoriasis	0.00027634	0.84223	0.00620161	0.5845	0.998992	1.02	KLRB1
rs17732655	9752097	T	psoriasis	-0.00044071	0.53461	0.0257577	0.07321	0.931106	0.962	KLRB1
rs116279712	9752621	A	psoriasis	0.00048078	0.43043	0.0340112	0.04323	0.966312	1.04	KLRB1
rs10732550	9752657	G	psoriasis	-0.00026269	0.56275	0.0614465	0.8352	0.997525	0.977	KLRB1
rs10771925	9752730	C	psoriasis	4.088e-05	0.85429	0.400307	0.685	0.996135	1	KLRB1
rs114348343	9752939	T	psoriasis	4.0241e-05	0.9627	0.0163412	0.05086	0.992996	1	KLRB1
rs35181877	9753831	G	psoriasis	0.00028027	0.43465	0.103985	0.5946	0.987827	1.03	KLRB1
rs150568392	9754011	C	psoriasis	0.0004309	0.43302	0.0410375	0.1083	0.998401	1.04	KLRB1
rs2191965	9754044	A	psoriasis	-0.00039266	0.4732	0.04142	0.1016	genotyped	0.966	KLRB1
rs192621560	9754338	C	psoriasis	-0.002853	0.22191	0.0023655	0.242	0.916934	0.777	KLRB1
rs4763655	9755578	A	psoriasis	-0.0002228	0.33051	0.361264	0.3285	0.977427	0.98	KLRB1
rs17805438	9755812	A	psoriasis	-0.00032477	0.6303	0.02683	0.297	genotyped	0.972	KLRB1
rs12818361	9755904	T	psoriasis	-0.00011711	0.62147	0.309516	0.8942	0.984715	0.99	KLRB1
rs4763657	9755905	A	psoriasis	-0.00021748	0.33783	0.362285	0.02546	1	0.981	KLRB1
rs73252327	9756322	A	psoriasis	0.00035956	0.26828	0.132137	0.9699	0.979255	1.03	KLRB1
rs10844160	9757154	T	psoriasis	-0.00012448	0.60303	0.300449	0.5689	0.982781	0.989	KLRB1
rs77209447	9757352	G	psoriasis	0.00016423	0.78188	0.0353982	0.4243	0.983101	1.01	KLRB1
rs57984884	9757679	T	psoriasis	0.00042053	0.19728	0.13085	0.7961	0.978851	1.04	KLRB1
rs12580472	9757689	T	psoriasis	0.00010806	0.62293	0.466631	0.4138	0.98495	1.01	KLRB1
rs11051877	9757973	T	psoriasis	-8.7395e-05	0.71186	0.312991	0.8444	0.982944	0.992	KLRB1
rs11051879	9758119	A	psoriasis	-0.00013335	0.57744	0.300757	0.6434	0.98236	0.988	KLRB1
rs113763461	9758230	G	psoriasis	0.00039793	0.4899	0.0378876	0.7213	0.978292	1.04	KLRB1
rs988711	9758340	A	psoriasis	0.00040955	0.34001	0.0726033	0.118	0.955752	1.04	KLRB1
rs10844161	9758367	C	psoriasis	-0.00013117	0.58371	0.300547	0.6759	0.982532	0.988	KLRB1
rs118065464	9758584	A	psoriasis	-0.0035393	0.25626	0.00124663	1	0.979132	0.731	KLRB1
rs10771926	9758600	G	psoriasis	-9.6281e-05	0.684	0.313164	0.8949	0.983092	0.992	KLRB1
rs190812141	9758708	A	psoriasis	-0.0010073	0.56663	0.00424357	0.008497	0.906776	0.915	KLRB1
rs4763675	9759465	C	psoriasis	-0.00025239	0.25457	0.425269	0.919	0.985905	0.978	KLRB1
rs10771927	9759582	A	psoriasis	-9.1321e-05	0.69951	0.313018	0.879	0.983061	0.992	KLRB1
rs5023032	9760028	T	psoriasis	-9.1658e-05	0.69846	0.31302	0.8727	0.983053	0.992	KLRB1
rs34323946	9760190	G	psoriasis	0.00032907	0.37783	0.0948397	0.8113	0.990824	1.03	KLRB1
rs117897866	9760327	A	psoriasis	0.00052484	0.54899	0.0159646	0.1541	0.981687	1.05	KLRB1
rs7312271	9760883	C	psoriasis	-0.0012436	0.11689	0.01943	2.058e-09	genotyped	0.896	KLRB1
rs143567031	9761078	G	psoriasis	0.0008972	0.35001	0.0143595	1	0.903534	1.08	KLRB1
rs7311954	9761291	C	psoriasis	0.00013344	0.54309	0.479686	0.8017	0.98481	1.01	KLRB1
rs7138347	9761430	T	psoriasis	0.00038487	0.19223	0.166348	0.7885	0.980471	1.03	KLRB1
rs11051912	9761558	G	psoriasis	0.00027721	0.56294	0.0585386	0.3786	0.933053	1.02	KLRB1
rs10771929	9761572	A	psoriasis	-9.4253e-05	0.69035	0.313032	0.8319	0.983099	0.992	KLRB1
rs7138619	9761698	T	psoriasis	0.00013166	0.54851	0.479395	0.7938	0.984654	1.01	KLRB1
rs10771930	9762018	A	psoriasis	-9.477e-05	0.68873	0.313037	0.8132	0.983114	0.992	KLRB1
rs111544538	9762218	G	psoriasis	0.0003852	0.19185	0.166346	0.7982	0.98044	1.03	KLRB1
rs12316700	9762323	A	psoriasis	0.00038605	0.19089	0.166387	0.7934	0.980195	1.03	KLRB1
rs10771935	9762644	A	psoriasis	0.00013281	0.545	0.479689	0.8231	0.984743	1.01	KLRB1
rs10771936	9762727	A	psoriasis	0.00013264	0.54552	0.479402	0.8018	0.984595	1.01	KLRB1
rs12830419	9762813	G	psoriasis	0.00030745	0.40705	0.0963496	0.8755	0.989491	1.03	KLRB1
rs12317027	9762917	C	psoriasis	0.00038561	0.19138	0.16634	0.8224	0.980463	1.03	KLRB1
rs7302021	9763589	T	psoriasis	-0.00025132	0.25665	0.425275	0.9384	0.985626	0.978	KLRB1
rs12310346	9763597	T	psoriasis	0.000384	0.19321	0.166367	0.8273	0.980549	1.03	KLRB1
rs61916061	9763690	T	psoriasis	0.00032787	0.37951	0.0948328	0.835	0.991198	1.03	KLRB1
rs7301291	9763737	A	psoriasis	-0.00024938	0.26056	0.423803	0.9243	0.985428	0.978	KLRB1
rs111284561	9763803	G	psoriasis	-0.00013983	0.86098	0.0192147	0.5376	0.98007	0.988	KLRB1
rs12296780	9763958	A	psoriasis	0.00038468	0.19243	0.166354	0.8224	0.98053	1.03	KLRB1
rs12317528	9763971	C	psoriasis	0.00038607	0.19084	0.166336	0.8321	0.980474	1.03	KLRB1
rs552499384	9764514	C	psoriasis	-0.0033767	0.28735	0.00121549	1	0.968239	0.742	KLRB1
rs60416399	9764897	A	psoriasis	-0.00025044	0.25833	0.425275	0.9328	0.985542	0.978	KLRB1
rs138258873	9765243	C	psoriasis	-0.0006649	0.23982	0.0402278	0.8756	0.957331	0.943	KLRB1
rs141395434	9766633	T	psoriasis	0.00032541	0.38305	0.094813	0.7814	0.991525	1.03	KLRB1
rs10844191	9766755	T	psoriasis	-9.5287e-05	0.68708	0.313062	0.8789	0.983386	0.992	KLRB1
rs12297897	9767310	T	psoriasis	0.00037614	0.20259	0.166249	0.8223	0.980537	1.03	KLRB1
rs11608817	9767607	G	psoriasis	0.00032699	0.38067	0.0948195	0.789	0.991771	1.03	KLRB1
rs112514935	9767663	G	psoriasis	-0.00013024	0.8705	0.0191874	0.5693	0.98061	0.989	KLRB1
rs7954289	9767744	A	psoriasis	-9.6648e-05	0.68284	0.313081	0.8505	0.983452	0.991	KLRB1
rs1863876	9767918	G	psoriasis	-3.0507e-05	0.89115	0.408409	0.4462	0.98385	0.997	KLRB1
rs11051959	9768804	G	psoriasis	-5.7716e-05	0.79348	0.443917	0.4624	0.984865	0.995	KLRB1
rs139577581	9769077	C	psoriasis	0.0013908	0.36581	0.00506649	0.2429	0.991068	1.13	KLRB1
rs10743789	9769079	G	psoriasis	-9.927e-05	0.67462	0.313256	0.9808	0.98357	0.991	KLRB1
rs117207575	9769239	C	psoriasis	-0.0018537	0.034058	0.016583	0.0148	0.9514	0.849	KLRB1
rs12321613	9769305	T	psoriasis	-5.6694e-05	0.79705	0.443927	0.4838	0.984911	0.995	KLRB1
rs74574759	9769721	C	psoriasis	0.00096841	0.16769	0.02469	0.7224	genotyped	1.09	KLRB1
rs1529418	9770355	A	psoriasis	-9.8913e-05	0.67581	0.312952	0.9457	0.983691	0.991	KLRB1
rs1529419	9770734	A	psoriasis	-0.00010021	0.67179	0.312984	0.9489	0.983676	0.991	KLRB1
rs7967102	9770749	T	psoriasis	0.00029406	0.42988	0.0951336	0.7744	0.991411	1.03	KLRB1
rs562594827	9771534	A	psoriasis	-0.0014284	0.39744	0.00449586	0.4355	0.929348	0.881	KLRB1
rs10844196	9771754	T	psoriasis	-0.00011026	0.64105	0.314377	1	0.981581	0.99	KLRB1
rs7314188	9771963	A	psoriasis	-9.4491e-05	0.68942	0.313267	0.9776	0.983794	0.992	KLRB1
rs7303246	9772584	G	psoriasis	-0.00029346	0.36545	0.130425	0.8095	0.993265	0.974	KLRB1
rs118016605	9772685	G	psoriasis	-4.3981e-05	0.93509	0.0434923	0.4067	0.978584	0.996	KLRB1
rs535529176	9772804	A	psoriasis	-0.0026959	0.30114	0.00176636	0.298	0.986105	0.788	KLRB1
rs11502791	9773148	C	psoriasis	0.0004048	0.15342	0.185667	0.4003	0.973253	1.04	KLRB1
rs6488054	9773232	A	psoriasis	-4.9577e-05	0.82208	0.44414	0.4312	0.984877	0.996	KLRB1
rs7136821	9773507	T	psoriasis	0.00029634	0.42649	0.0949322	0.7894	0.99243	1.03	KLRB1
rs10771947	9774827	A	psoriasis	-9.5638e-05	0.68586	0.31336	0.9936	0.983609	0.992	KLRB1
rs118187855	9774939	A	psoriasis	0.00058258	0.50133	0.0161559	0.1461	0.991182	1.05	KLRB1
rs35721310	9776063	A	psoriasis	-9.2857e-05	0.69442	0.313707	0.9808	0.983625	0.992	KLRB1
rs7137789	9776154	C	psoriasis	0.00080451	0.46393	0.0105502	0.4422	0.939654	1.07	KLRB1
rs147041022	9776847	A	psoriasis	0.0006635	0.55317	0.0105357	0.1484	0.903088	1.06	KLRB1
rs541939464	9776893	C	psoriasis	0.00068651	0.82156	0.0013812	1	0.924861	1.06	KLRB1
rs11052008	9777079	A	psoriasis	-9.491e-05	0.68803	0.3135	0.9425	0.983945	0.992	KLRB1
rs12820641	9777100	A	psoriasis	0.00030477	0.413	0.0950522	0.643	0.993308	1.03	KLRB1
rs148215929	9777959	A	psoriasis	0.00069652	0.56687	0.00870179	0.4076	0.921866	1.06	KLRB1
rs10844206	9778001	T	psoriasis	-9.8111e-05	0.67818	0.313034	0.8948	0.984288	0.991	KLRB1
rs139592670	9778268	C	psoriasis	-0.00020805	0.78932	0.0201097	0.6981	0.991384	0.982	KLRB1
rs11052013	9778704	T	psoriasis	-4.8771e-05	0.82495	0.445255	0.4355	0.983775	0.996	KLRB1
rs16909916	9779429	G	psoriasis	-0.00018655	0.81539	0.0191094	0.5066	0.985969	0.984	KLRB1
rs571809058	9779824	C	psoriasis	-0.0018071	0.58946	0.00112095	1	0.939049	0.852	KLRB1
rs66927586	9779894	C	psoriasis	-5.769e-05	0.79345	0.443997	0.4714	0.985957	0.995	KLRB1
rs116848999	9779934	A	psoriasis	-0.00060698	0.52287	0.0138549	0.7038	0.954495	0.948	KLRB1
rs139939659	9780005	T	psoriasis	-5.7664e-05	0.79354	0.443996	0.4714	0.985976	0.995	KLRB1
rs138256406	9780210	G	psoriasis	-0.00030999	0.70038	0.0188035	0.6324	0.986016	0.973	KLRB1
rs11052031	9782179	G	psoriasis	-9.5695e-05	0.68558	0.313086	0.8822	0.984744	0.992	KLRB1
rs117309417	9782185	C	psoriasis	0.00075821	0.40995	0.0152138	0.4338	0.929982	1.07	KLRB1
rs117764025	9782811	T	psoriasis	-0.00032736	0.50042	0.0553779	0.1357	0.959239	0.971	KLRB1
rs10844225	9783475	T	psoriasis	-9.5631e-05	0.68575	0.313103	0.8981	0.984961	0.992	KLRB1
rs772572456	9783597	A	psoriasis	-0.0048266	0.15133	0.00112075	1	0.93622	0.653	KLRB1
rs12308360	9783761	G	psoriasis	-5.5725e-05	0.80028	0.444018	0.4717	0.98652	0.995	KLRB1
rs12301481	9783770	G	psoriasis	-5.657e-05	0.79731	0.443993	0.4847	0.986576	0.995	KLRB1
rs191137965	9784001	C	psoriasis	-0.0011778	0.48811	0.00453129	0.834	0.91016	0.901	KLRB1
rs189156135	9784361	A	psoriasis	-0.0018141	0.3465	0.00324828	1	0.98254	0.852	KLRB1
rs141362830	9784466	C	psoriasis	-0.0010665	0.33861	0.00982771	1	0.97767	0.91	KLRB1
rs146836049	9784821	A	psoriasis	-0.00093286	0.63079	0.00346992	1	0.903753	0.921	KLRB1
rs10844233	9785225	T	psoriasis	-9.774e-05	0.6791	0.313335	0.8011	0.985358	0.991	KLRB1
rs1987426	9785874	A	psoriasis	-5.4924e-05	0.80268	0.458381	0.3363	0.984297	0.995	KLRB1
rs10844236	9786114	T	psoriasis	0.00029081	0.43422	0.0950216	0.6432	0.99586	1.03	KLRB1
rs7310367	9786707	G	psoriasis	-9.5189e-05	0.68686	0.313676	0.8167	0.985735	0.992	KLRB1
rs75893877	9786780	A	psoriasis	-0.00019402	0.80798	0.0190992	0.5066	0.988466	0.983	KLRB1
rs17805498	9787185	G	psoriasis	-0.00046468	0.4545	0.0333771	0.1253	0.952069	0.96	KLRB1
rs80160971	9787583	A	psoriasis	-0.00084978	0.22159	0.0254517	0.6267	0.986017	0.928	KLRB1
rs143857177	9787685	G	psoriasis	-0.00047551	0.63172	0.0129292	1	0.937734	0.959	KLRB1
rs6488065	9788572	A	psoriasis	-0.0002612	0.4196	0.1305	0.7297	genotyped	0.977	KLRB1
rs117152601	9788965	C	psoriasis	0.00070794	0.25134	0.0330201	0.517	0.972225	1.06	KLRB1
rs560148696	9790396	G	psoriasis	-0.0013777	0.53173	0.00248385	0.7232	0.983763	0.885	KLRB1
rs72656629	9791702	T	psoriasis	-0.0001071	0.62645	0.444187	0.6253	0.989074	0.991	KLRB1
rs10466762	9792001	G	psoriasis	-0.00026235	0.38784	0.151539	0.3923	0.997638	0.977	KLRB1
rs148567940	9792255	C	psoriasis	-0.00018152	0.90787	0.00520779	0.07789	0.920088	0.984	KLRB1
rs113131146	9792800	T	psoriasis	-0.00021409	0.79303	0.0183637	0.6938	0.984363	0.981	KLRB1
rs190834453	9793174	G	psoriasis	0.0011216	0.45923	0.00561377	0.7572	0.92309	1.1	KLRB1
rs149892174	9793715	T	psoriasis	0.00063866	0.45858	0.0163335	0.1508	0.991954	1.06	KLRB1
rs12366792	9794500	A	psoriasis	0.00026206	0.44144	0.115798	0.2605	0.996694	1.02	KLRB1
rs542509788	9794552	T	psoriasis	0.0013527	0.5702	0.00218226	0.6863	0.953178	1.13	KLRB1
rs1863871	9795254	C	psoriasis	-0.00027235	0.36979	0.1517	0.5294	genotyped	0.976	KLRB1
rs141936027	9795527	A	psoriasis	0.00068303	0.42803	0.0162597	0.1508	0.9958	1.06	KLRB1
rs146403759	9795529	T	psoriasis	-0.0016118	0.33898	0.00452349	1	0.924318	0.867	KLRB1
rs538158876	9795546	G	psoriasis	-0.00035042	0.81698	0.00557095	0.03111	0.923121	0.969	KLRB1
rs10844267	9795980	G	psoriasis	0.00025939	0.44609	0.115809	0.2713	0.996782	1.02	KLRB1
rs34833649	9796489	T	psoriasis	0.00025854	0.44746	0.115993	0.2609	0.995898	1.02	KLRB1
rs35561167	9796573	T	psoriasis	0.00025946	0.44605	0.115808	0.2677	0.996418	1.02	KLRB1
rs10844269	9796871	G	psoriasis	-4.1417e-05	0.86322	0.292708	0.482	0.989985	0.996	KLRB1
rs12809846	9796909	C	psoriasis	0.00026006	0.44504	0.115806	0.2676	0.996241	1.02	KLRB1
rs4763715	9797034	G	psoriasis	-0.00023379	0.28709	0.461894	0.2829	0.988476	0.98	KLRB1
rs4763716	9797089	A	psoriasis	-0.00010697	0.62658	0.444261	0.6754	0.991113	0.991	KLRB1
rs7132715	9797386	A	psoriasis	-4.6494e-05	0.84668	0.292384	0.4514	0.990006	0.996	KLRB1
rs113084410	9797439	G	psoriasis	-0.00017898	0.82662	0.0183328	0.6925	0.983603	0.984	KLRB1
rs151133259	9797670	C	psoriasis	-0.0036151	0.2458	0.00127278	1	0.960263	0.726	KLRB1
rs4763717	9797866	C	psoriasis	-0.00022939	0.29604	0.462086	0.2987	0.989191	0.98	KLRB1
rs75394732	9798744	G	psoriasis	-0.00021288	0.78959	0.0192637	0.6004	0.981581	0.981	KLRB1
rs2401385	9799126	A	psoriasis	8.6639e-05	0.7286	0.260393	0.3164	0.985805	1.01	KLRB1
rs77876674	9799355	C	psoriasis	-0.0002234	0.77962	0.0192392	0.5674	0.98154	0.98	KLRB1
rs2401386	9800058	A	psoriasis	-5.7995e-05	0.80898	0.292863	0.4721	0.994323	0.995	KLRB1
rs775881161	9800131	T	psoriasis	0.0065882	0.021477	0.00155901	1	0.925987	1.79	KLRB1
rs35098654	9800589	T	psoriasis	0.0002073	0.55083	0.110863	0.22	0.993167	1.02	KLRB1
rs35015427	9800639	C	psoriasis	0.00025053	0.46974	0.111808	0.2865	0.991128	1.02	KLRB1
rs7302081	9800926	T	psoriasis	-0.00017863	0.47913	0.250661	0.8054	0.989739	0.984	KLRB1
rs558145024	9801184	T	psoriasis	0.00096409	0.70484	0.00202378	0.6419	0.906266	1.09	KLRB1
rs3764024	9801373	G	psoriasis	0.0001049	0.65485	0.31539	0.2865	0.997634	1.01	KLRB1
rs3764023	9801382	T	psoriasis	8.7634e-05	0.71527	0.2904	0.2118	genotyped	1.01	KLRB1
rs180671267	9801485	T	psoriasis	0.0025128	0.018651	0.0112989	0.3358	0.921839	1.25	KLRB1
rs80298010	9801719	A	psoriasis	-0.00021574	0.75697	0.0252229	0.4492	0.988054	0.981	KLRB1
rs7313927	9801827	A	psoriasis	-7.3176e-05	0.76057	0.290056	0.2921	0.999149	0.994	KLRB1
rs7299076	9801908	G	psoriasis	-0.00011667	0.59702	0.421701	0.9219	0.997296	0.99	KLRB1
rs1560007	9802531	A	psoriasis	0.00010409	0.63877	0.407707	0.9605	0.997031	1.01	KLRB1
rs73237255	9802742	T	psoriasis	0.00045903	0.15856	0.129087	0.2969	0.990833	1.04	KLRB1
rs113428280	9803681	A	psoriasis	-0.00021628	0.75631	0.0252309	0.4286	0.988205	0.981	KLRB1
rs11830731	9803933	G	psoriasis	-0.00016815	0.80893	0.0253317	0.4107	0.989475	0.985	KLRB1
rs184883782	9803938	T	psoriasis	0.00033056	0.89129	0.00220542	0.4142	0.921255	1.03	KLRB1
rs7975716	9804181	G	psoriasis	-0.00029214	0.18269	0.458688	0.5513	0.990003	0.975	KLRB1
rs7961262	9804226	G	psoriasis	0.00050499	0.18103	0.0918449	0.4971	0.994683	1.05	KLRB1
rs10047657	9804373	G	psoriasis	-0.00017214	0.46896	0.303583	0.2488	0.992607	0.985	KLRB1
rs117519746	9804388	T	psoriasis	0.00079332	0.35745	0.0163315	0.1512	0.990885	1.07	KLRB1
rs7961416	9804413	G	psoriasis	0.00051081	0.17386	0.0927556	0.4634	0.995963	1.05	KLRB1
rs10771987	9804980	C	psoriasis	6.7191e-06	0.97575	0.421928	0.7712	0.992804	1	KLRB1
rs12322854	9805089	T	psoriasis	-5.7402e-07	0.99933	0.0261987	0.3814	0.980426	1	KLRB1
rs10844325	9805098	C	psoriasis	-0.00017782	0.45427	0.303796	0.3178	0.992611	0.984	KLRB1
rs10844327	9805233	G	psoriasis	0.00037572	0.26553	0.118074	0.7999	0.997809	1.03	KLRB1
rs12831287	9805321	C	psoriasis	0.00051071	0.17395	0.0927492	0.4757	0.996028	1.05	KLRB1
rs11052207	9805836	G	psoriasis	0.00051036	0.17424	0.092752	0.482	0.996059	1.05	KLRB1
rs12310789	9806067	A	psoriasis	0.0003807	0.2593	0.118029	0.7999	0.997845	1.03	KLRB1
rs11052209	9806132	A	psoriasis	0.00050996	0.17621	0.0919907	0.5503	0.995976	1.05	KLRB1
rs528591306	9806136	T	psoriasis	-0.00098189	0.65583	0.002506	0.7261	0.972016	0.917	KLRB1
rs34981673	9806219	C	psoriasis	0.00051035	0.17424	0.0927521	0.482	0.996062	1.05	KLRB1
rs35642909	9806405	A	psoriasis	0.00051008	0.17611	0.0919909	0.5503	0.995981	1.05	KLRB1
rs73057504	9806426	C	psoriasis	0.00045293	0.56303	0.0197	0.2717	genotyped	1.04	KLRB1
rs958340	9806654	A	psoriasis	0.00038297	0.25656	0.118001	0.8444	0.997888	1.03	KLRB1
rs7962321	9807073	C	psoriasis	0.00038074	0.25926	0.118029	0.7999	0.997934	1.03	KLRB1
rs7959406	9807117	G	psoriasis	0.00038074	0.25926	0.118029	0.7999	0.997934	1.03	KLRB1
rs758280836	9807123	T	psoriasis	0.0028611	0.12496	0.00361703	0.6218	0.941609	1.29	KLRB1
rs7959726	9807331	G	psoriasis	0.00037781	0.26291	0.118066	0.7999	0.99775	1.03	KLRB1
rs7973603	9807553	T	psoriasis	0.00038108	0.25883	0.118026	0.7935	0.997922	1.03	KLRB1
rs143407514	9807624	T	psoriasis	-0.0023784	0.31072	0.0023465	0.7077	0.908227	0.81	KLRB1
rs1863873	9807634	C	psoriasis	-0.00017997	0.44899	0.303529	0.2891	0.992316	0.984	KLRB1
rs1863874	9807716	A	psoriasis	-0.00018002	0.44888	0.303528	0.2891	0.992315	0.984	KLRB1
rs1560008	9808069	C	psoriasis	0.00038065	0.25936	0.11803	0.7999	0.99794	1.03	KLRB1
rs1560009	9808100	A	psoriasis	-0.00019106	0.7839	0.0252106	0.4298	0.989844	0.983	KLRB1
rs116404329	9808278	T	psoriasis	-0.00074139	0.21187	0.03492	0.1269	genotyped	0.937	KLRB1
rs2114869	9808426	C	psoriasis	0.00038198	0.25773	0.118017	0.7872	0.997923	1.03	KLRB1
rs9919786	9808721	T	psoriasis	0.00038373	0.25559	0.118	0.7809	0.997765	1.03	KLRB1
rs9919759	9808775	C	psoriasis	0.00038077	0.25921	0.118029	0.7999	0.997958	1.03	KLRB1
rs9919787	9808776	A	psoriasis	0.0003821	0.25758	0.118016	0.7872	0.997937	1.03	KLRB1
rs9919714	9809025	A	psoriasis	-0.00018055	0.7956	0.0251856	0.4296	0.989736	0.984	KLRB1
rs7302110	9809062	G	psoriasis	0.00051175	0.17309	0.0927408	0.4757	0.99605	1.05	KLRB1
rs7131784	9809178	T	psoriasis	8.0403e-06	0.97098	0.421826	0.7579	0.992952	1	KLRB1
rs7316121	9809197	A	psoriasis	8.0608e-06	0.97091	0.421826	0.7579	0.99295	1	KLRB1
rs7132037	9809353	T	psoriasis	0.00037921	0.26123	0.117929	0.7372	0.99845	1.03	KLRB1
rs7305937	9809441	G	psoriasis	0.00037909	0.26138	0.117927	0.7372	0.998476	1.03	KLRB1
rs7302746	9809533	G	psoriasis	0.00037909	0.26138	0.117927	0.7372	0.998477	1.03	KLRB1
rs7316769	9809721	T	psoriasis	-0.00043229	0.18266	0.129691	0.243	0.994932	0.963	KLRB1
rs150744788	9809956	T	psoriasis	0.00078335	0.36355	0.0162708	0.1832	0.994301	1.07	KLRB1
rs17805558	9810000	G	psoriasis	-0.000264	0.23125	0.432246	0.7699	0.991516	0.977	KLRB1
rs7309800	9810144	C	psoriasis	0.00037914	0.26131	0.117927	0.7434	0.998492	1.03	KLRB1
rs7306991	9810451	T	psoriasis	-0.00049921	0.1058	0.145958	0.2578	0.995727	0.957	KLRB1
rs113924907	9810749	T	psoriasis	-4.4613e-05	0.94036	0.0355419	0.2846	0.972813	0.996	KLRB1
rs7310568	9810764	C	psoriasis	0.00037903	0.26144	0.117927	0.7434	0.998501	1.03	KLRB1
rs11052234	9810914	C	psoriasis	0.00050759	0.17667	0.0926565	0.4329	0.996435	1.05	KLRB1
rs117122900	26991011	C	psoriasis	-0.002255	0.064915	0.008035	0.4517	genotyped	0.819	MIAT
rs2011195	26992220	T	psoriasis	6.3359e-05	0.81773	0.196763	0.9567	0.990519	1.01	MIAT
rs149888492	26992362	T	psoriasis	1.5686e-05	0.98594	0.0160731	0.578	0.93715	1	MIAT
rs74683074	26992549	A	psoriasis	0.00016489	0.77992	0.0359867	0.01352	0.976781	1.01	MIAT
rs118095417	26992852	G	psoriasis	-0.00047801	0.55099	0.0193805	0.1774	0.965773	0.959	MIAT
rs75422898	26993044	T	psoriasis	0.00016105	0.78552	0.0358191	0.03315	0.975861	1.01	MIAT
rs5761618	26993706	G	psoriasis	0.00015914	0.4832	0.362736	0.8792	0.993294	1.01	MIAT
rs183250556	26993993	T	psoriasis	0.00034999	0.90878	0.00137493	0.415	0.910754	1.03	MIAT
rs5752352	26994007	T	psoriasis	-0.00010198	0.74092	0.146794	0.7001	0.990787	0.991	MIAT
rs73163243	26994150	C	psoriasis	0.0025485	0.013305	0.0115251	0.2293	0.977927	1.25	MIAT
rs2105917	26994275	T	psoriasis	-0.0007191	0.10513	0.0660892	0.4967	0.974104	0.938	MIAT
rs569199588	26994342	G	psoriasis	-0.0025745	0.35942	0.00165763	0.537	0.900206	0.796	MIAT
rs73163245	26994546	A	psoriasis	0.0024853	0.01584	0.011511	0.4072	0.977608	1.25	MIAT
rs56123451	26995967	T	psoriasis	0.0001198	0.65795	0.204457	0.9579	0.993187	1.01	MIAT
rs76625778	26996946	A	psoriasis	0.00012797	0.64575	0.187509	0.009466	0.998951	1.01	MIAT
rs7287905	26997184	T	psoriasis	-7.5614e-05	0.82114	0.121086	0.8281	0.991909	0.993	MIAT
rs73163248	26997269	T	psoriasis	-0.00050888	0.4693	0.0248599	0.8876	0.988023	0.956	MIAT
rs2301438	26997342	C	psoriasis	0.00012569	0.65153	0.187671	0.008611	0.997876	1.01	MIAT
rs2301440	26997482	C	psoriasis	0.00014813	0.49677	0.486454	0.3719	0.995291	1.01	MIAT
rs2301441	26997730	T	psoriasis	0.00012752	0.6469	0.187653	0.01365	0.998405	1.01	MIAT
rs117962500	26998163	T	psoriasis	-0.00024538	0.85374	0.00713616	0.2627	0.936643	0.979	MIAT
rs554220342	26998499	A	psoriasis	0.003715	0.045991	0.00357045	0.4577	0.957737	1.39	MIAT
rs8138884	26998799	A	psoriasis	0.00017432	0.5552	0.161744	0.3817	0.998838	1.02	MIAT
rs8140620	26998961	C	psoriasis	0.00012499	0.65342	0.187688	0.01454	0.998392	1.01	MIAT
rs188115745	26999194	C	psoriasis	0.00065018	0.64187	0.00669275	0.8949	0.904987	1.06	MIAT
rs191716714	26999259	T	psoriasis	0.0010498	0.64964	0.00244556	0.2653	0.904224	1.1	MIAT
rs5761621	26999358	G	psoriasis	6.6482e-05	0.77783	0.308743	0.05897	0.994691	1.01	MIAT
rs141255483	26999420	A	psoriasis	0.00021497	0.56392	0.0965398	0.7309	0.975493	1.02	MIAT
rs112775076	26999465	A	psoriasis	0.0001215	0.66262	0.187539	0.01742	0.99822	1.01	MIAT
rs5761622	26999593	T	psoriasis	-6.8965e-05	0.83663	0.121074	0.8406	0.992068	0.994	MIAT
rs75049441	26999781	G	psoriasis	0.00012218	0.66087	0.18753	0.0185	0.998162	1.01	MIAT
rs7290642	27001364	A	psoriasis	0.0022692	0.024729	0.0119859	0.2447	0.974215	1.22	MIAT
rs4822747	27001689	A	psoriasis	0.00016132	0.58511	0.161741	0.5007	0.998988	1.01	MIAT
rs9613228	27002223	A	psoriasis	-0.00047076	0.046568	0.307707	0.3724	0.990776	0.959	MIAT
rs4820690	27002392	T	psoriasis	0.00012137	0.66287	0.187663	0.0257	0.998469	1.01	MIAT
rs78165948	27002555	T	psoriasis	0.0022369	0.029668	0.0115345	0.1762	0.980164	1.22	MIAT
rs5752354	27002648	C	psoriasis	-0.0013521	0.3811	0.00512973	1	0.966748	0.887	MIAT
rs16982433	27002786	C	psoriasis	-0.00016463	0.81023	0.0259043	0.1325	0.995007	0.986	MIAT
rs141736912	27003312	G	psoriasis	-0.00053567	0.4323	0.0268626	0.422	0.968659	0.954	MIAT
rs73163253	27003496	T	psoriasis	-0.00037691	0.58572	0.0269357	0.1641	0.941624	0.967	MIAT
rs147206089	27003957	G	psoriasis	0.0014668	0.62052	0.001357	1	genotyped	1.14	MIAT
rs5761626	27004089	C	psoriasis	-0.00026773	0.36252	0.166642	0.004577	0.988869	0.977	MIAT
rs5761627	27004298	G	psoriasis	0.00011424	0.68141	0.187899	0.01995	0.998544	1.01	MIAT
rs2071859	27004300	T	psoriasis	-8.6675e-05	0.79538	0.121239	0.8978	0.992019	0.992	MIAT
rs148758949	27004673	T	psoriasis	-0.00051817	0.44794	0.0268283	0.4024	0.967918	0.955	MIAT
rs5752355	27004902	A	psoriasis	0.00011395	0.68215	0.187905	0.01907	0.998626	1.01	MIAT
rs4822748	27004964	A	psoriasis	0.00011578	0.67736	0.187884	0.01822	0.99855	1.01	MIAT
rs4820691	27005122	C	psoriasis	0.00011558	0.67789	0.187884	0.01878	0.998565	1.01	MIAT
rs4822749	27005158	T	psoriasis	0.00011375	0.68269	0.187905	0.01966	0.998641	1.01	MIAT
rs117474288	27005163	T	psoriasis	0.00015737	0.83731	0.0217793	0.1987	0.942598	1.01	MIAT
rs4822750	27005194	G	psoriasis	0.00011375	0.68269	0.187905	0.01966	0.998641	1.01	MIAT
rs117187004	27005439	A	psoriasis	-0.00077187	0.47366	0.0112568	0.9349	0.913542	0.934	MIAT
rs5761629	27005470	A	psoriasis	0.00016553	0.5752	0.161788	0.4359	0.999563	1.01	MIAT
rs12628704	27006136	A	psoriasis	0.00016784	0.57125	0.160958	0.5202	0.99686	1.01	MIAT
rs2267102	27006143	C	psoriasis	0.00011545	0.67912	0.187079	0.02873	0.996279	1.01	MIAT
rs2267103	27006189	A	psoriasis	-0.00046701	0.04825	0.308045	0.3537	0.991002	0.96	MIAT
rs2267104	27006308	G	psoriasis	0.000306	0.24893	0.215423	0.9353	0.993973	1.03	MIAT
rs5761630	27006698	C	psoriasis	-0.00018244	0.5394	0.1609	0.01276	genotyped	0.984	MIAT
rs5761631	27007269	A	psoriasis	-9.1932e-05	0.7831	0.121461	0.8916	0.992452	0.992	MIAT
rs57400078	27008020	T	psoriasis	-0.00020086	0.76888	0.0261178	0.1354	0.992539	0.982	MIAT
rs576275051	27008466	T	psoriasis	-0.0010785	0.51271	0.00474183	0.4359	0.923508	0.909	MIAT
rs4822751	27009128	T	psoriasis	0.00016031	0.58755	0.161771	0.4209	0.99827	1.01	MIAT
rs144531930	27009673	A	psoriasis	-0.00019632	0.77429	0.0260799	0.1973	0.991058	0.983	MIAT
rs138002072	27010237	C	psoriasis	-0.00063752	0.40972	0.0207182	0.7047	0.974634	0.945	MIAT
rs117298144	27010375	T	psoriasis	0.00055259	0.50993	0.017966	0.6213	0.950725	1.05	MIAT
rs4822752	27011420	T	psoriasis	0.00021886	0.31608	0.4872	0.1778	genotyped	1.02	MIAT
rs4822753	27011460	A	psoriasis	0.00032027	0.22719	0.215607	0.8474	0.994839	1.03	MIAT
rs139826232	27011582	T	psoriasis	-0.00022363	0.74413	0.0260264	0.174	0.991036	0.98	MIAT
rs57839407	27012473	T	psoriasis	-0.00022559	0.74201	0.0260343	0.2498	0.990275	0.98	MIAT
rs4822754	27012894	G	psoriasis	0.00023026	0.29072	0.474312	0.464	0.998261	1.02	MIAT
rs16982446	27013062	T	psoriasis	-0.00023113	0.73589	0.0260493	0.2648	0.989868	0.98	MIAT
rs76892096	27013566	T	psoriasis	-0.00023369	0.73329	0.0260274	0.2643	0.989041	0.98	MIAT
rs77926469	27013784	T	psoriasis	-0.00022525	0.74246	0.0260463	0.2502	0.989167	0.98	MIAT
rs58450956	27014346	A	psoriasis	-0.00021413	0.75429	0.0261811	0.2817	0.985812	0.981	MIAT
rs74621382	27014348	A	psoriasis	-0.00015049	0.75593	0.0549607	0.1736	0.973689	0.987	MIAT
rs16982453	27014428	A	psoriasis	-0.0002217	0.74643	0.0260412	0.2502	0.988903	0.981	MIAT
rs5761635	27014467	T	psoriasis	0.00022787	0.31285	0.370886	0.4865	0.995315	1.02	MIAT
rs74850745	27015535	A	psoriasis	-0.00018207	0.79066	0.0260432	0.28	0.988169	0.984	MIAT
rs2283843	27017300	T	psoriasis	0.00021351	0.34567	0.366301	0.5633	0.994887	1.02	MIAT
rs5997109	27017435	G	psoriasis	0.00018839	0.39888	0.392364	0.8831	0.995518	1.02	MIAT
rs16982454	27017996	C	psoriasis	-0.00024213	0.7305	0.0252124	0.4492	0.97088	0.979	MIAT
rs76095025	27018001	C	psoriasis	-0.00021318	0.76115	0.0252926	0.4536	0.972213	0.981	MIAT
rs78238497	27018010	T	psoriasis	-0.00047387	0.35438	0.0487197	0.5451	0.973629	0.959	MIAT
rs16982456	27018049	C	psoriasis	-0.00017835	0.79499	0.0260468	0.3286	0.985493	0.984	MIAT
rs79804759	27018765	C	psoriasis	-0.00017602	0.79768	0.0260471	0.2792	0.984814	0.985	MIAT
rs77606007	27019042	A	psoriasis	-0.000178	0.79548	0.0260519	0.3454	0.984436	0.984	MIAT
rs2071860	27019128	T	psoriasis	0.00023138	0.30729	0.364715	0.6554	0.994428	1.02	MIAT
rs74847916	27019154	A	psoriasis	-0.00015291	0.82369	0.0260847	0.3455	0.984468	0.987	MIAT
rs35520672	27019264	G	psoriasis	-0.0020116	0.0047025	0.02405	0.7739	genotyped	0.837	MIAT
rs78839637	27019374	T	psoriasis	-0.00016669	0.80831	0.0260158	0.3099	0.985402	0.985	MIAT
rs74422745	27019498	T	psoriasis	-0.00017299	0.80117	0.0260425	0.3444	0.98412	0.985	MIAT
rs57170401	27019951	A	psoriasis	-0.0001706	0.80393	0.0260399	0.3621	0.983577	0.985	MIAT
rs4820692	27020011	G	psoriasis	0.00020531	0.3584	0.390854	0.9199	0.994657	1.02	MIAT
rs149406069	27020327	A	psoriasis	-0.00012898	0.91877	0.00797312	0.6588	0.935763	0.989	MIAT
rs59203011	27020332	A	psoriasis	-0.00016897	0.8058	0.0260396	0.3438	0.983195	0.985	MIAT
rs8137032	27020705	C	psoriasis	-0.00015455	0.62973	0.1336	0.03745	genotyped	0.986	MIAT
rs5761636	27020835	A	psoriasis	0.00029032	0.20367	0.353713	0.5324	0.992408	1.03	MIAT
rs73880138	27020962	C	psoriasis	-0.00046798	0.42133	0.0368239	0.9601	0.981633	0.959	MIAT
rs73880139	27021021	G	psoriasis	-0.00046775	0.42159	0.0368222	0.9601	0.981557	0.959	MIAT
rs2071861	27021189	G	psoriasis	-1.6088e-06	0.99557	0.170552	0.6142	0.994572	1	MIAT
rs60247117	27021358	T	psoriasis	-0.00050517	0.38672	0.036636	0.9599	0.981085	0.956	MIAT
rs2071862	27021401	A	psoriasis	0.00012826	0.6887	0.133462	0.4788	0.997725	1.01	MIAT
rs73880140	27021409	T	psoriasis	-0.00048201	0.40934	0.0365665	0.9197	0.980792	0.958	MIAT
rs4276	27021425	G	psoriasis	-0.0004136	0.058337	0.478836	0.7891	0.992896	0.964	MIAT
rs5761637	27021457	C	psoriasis	-0.00033739	0.25309	0.1661	5.836e-07	genotyped	0.971	MIAT
rs56117601	27021589	G	psoriasis	-0.00051148	0.38069	0.0366655	0.98	0.980888	0.956	MIAT
rs56296779	27021857	A	psoriasis	-0.0012498	0.24474	0.0105565	0.8655	0.978159	0.895	MIAT
rs55721827	27021927	A	psoriasis	-0.0012663	0.23819	0.0105834	0.8655	0.975774	0.894	MIAT
rs2239832	27021936	G	psoriasis	7.667e-06	0.97888	0.17091	0.7023	0.993276	1	MIAT
rs58214093	27021961	T	psoriasis	-0.001264	0.23908	0.0105811	0.8655	0.975819	0.894	MIAT
rs560641889	27022258	T	psoriasis	0.0040702	0.02109	0.00407383	0.6586	0.933981	1.43	MIAT
rs79664640	27022573	G	psoriasis	-0.0012648	0.23881	0.0105817	0.8655	0.975611	0.894	MIAT
rs146414288	27022796	A	psoriasis	-0.0016027	0.11383	0.0125058	0.3588	0.928158	0.868	MIAT
rs143372074	27023054	T	psoriasis	-0.00035259	0.79338	0.00707952	0.2074	0.92238	0.969	MIAT
rs5752356	27023681	T	psoriasis	0.00014474	0.65071	0.133997	0.5075	0.99771	1.01	MIAT
rs6005099	27024504	T	psoriasis	0.00015027	0.63791	0.134385	0.518	0.997321	1.01	MIAT
rs5761640	27025661	T	psoriasis	0.00027414	0.36616	0.152225	0.6812	0.995814	1.02	MIAT
rs5761641	27025786	C	psoriasis	0.00039283	0.20837	0.141694	0.5325	0.997702	1.04	MIAT
rs5752359	27025879	C	psoriasis	0.00039115	0.21046	0.141629	0.6186	0.997446	1.04	MIAT
rs75205052	27026286	A	psoriasis	-0.00016482	0.81088	0.0260282	0.4185	0.980188	0.986	MIAT
rs1573709	27026804	T	psoriasis	-0.0001155	0.67723	0.191953	0.05179	0.992329	0.99	MIAT
rs2331287	27026923	A	psoriasis	-0.0001154	0.6775	0.191952	0.05179	0.992298	0.99	MIAT
rs561710440	27027033	C	psoriasis	-0.0029497	0.20155	0.00243449	0.7287	0.91187	0.77	MIAT
rs5752361	27027214	G	psoriasis	0.00050779	0.099365	0.14611	0.6719	0.998293	1.05	MIAT
rs2331288	27027247	C	psoriasis	-0.0001187	0.66898	0.191802	0.05572	0.991864	0.99	MIAT
rs5752363	27027358	A	psoriasis	0.00050473	0.10149	0.146043	0.6668	0.9983	1.05	MIAT
rs117403997	27027365	A	psoriasis	-0.0014414	0.20688	0.0100668	0.2671	0.906408	0.88	MIAT
rs5752364	27027761	C	psoriasis	0.00049951	0.10498	0.146136	0.6769	0.998289	1.05	MIAT
rs13055739	27027914	A	psoriasis	-0.00042074	0.071706	0.322032	0.21	0.990195	0.963	MIAT
rs5761643	27027942	T	psoriasis	0.00050599	0.10059	0.146047	0.6868	0.998583	1.05	MIAT
rs145614756	27028369	T	psoriasis	0.00014625	0.79657	0.038852	0.03457	0.980839	1.01	MIAT
rs147748240	27028432	G	psoriasis	0.00070165	0.49482	0.0117674	0.5039	0.960058	1.06	MIAT
rs5761646	27028449	T	psoriasis	-0.00030585	0.18221	0.348507	0.01425	0.992925	0.973	MIAT
rs5752365	27028829	G	psoriasis	-0.00049692	0.10771	0.1456	0.1927	genotyped	0.957	MIAT
rs5761648	27028899	C	psoriasis	0.00047775	0.12146	0.145524	0.7267	0.999795	1.04	MIAT
rs5752366	27029072	T	psoriasis	0.00046879	0.12901	0.145196	0.7159	0.998907	1.04	MIAT
rs5752367	27029284	A	psoriasis	0.00046878	0.12904	0.145196	0.7314	0.998747	1.04	MIAT
rs5752368	27029316	A	psoriasis	9.7771e-05	0.7338	0.176056	0.6825	0.986181	1.01	MIAT
rs2009060	27029393	T	psoriasis	-0.00026906	0.35483	0.170208	0.01093	0.993736	0.976	MIAT
rs5761649	27029401	A	psoriasis	0.00047858	0.12088	0.145518	0.737	0.99922	1.04	MIAT
rs10439930	27029472	A	psoriasis	0.00047023	0.12791	0.145186	0.7262	0.998494	1.04	MIAT
rs5761650	27029489	G	psoriasis	0.00036113	0.22876	0.156009	0.9276	0.997333	1.03	MIAT
rs2009066	27029545	G	psoriasis	-0.00030578	0.18242	0.348485	0.01296	0.9924	0.973	MIAT
rs138166414	27029856	C	psoriasis	-0.00064184	0.41071	0.0210957	0.2858	0.939553	0.945	MIAT
rs4626025	27029861	C	psoriasis	0.00014545	0.53166	0.330446	0.7121	0.988853	1.01	MIAT
rs756505	27030951	T	psoriasis	-0.00038661	0.077331	0.481814	0.6408	0.988089	0.966	MIAT
rs756506	27030998	C	psoriasis	-0.00039637	0.070162	0.481536	0.6457	0.988018	0.966	MIAT
rs5752370	27031721	C	psoriasis	0.00031999	0.17971	0.301506	0.6388	0.986529	1.03	MIAT
rs73880142	27033140	C	psoriasis	-0.0011759	0.25531	0.0114764	1	0.970018	0.901	MIAT
rs9625059	27033263	T	psoriasis	0.00045199	0.14224	0.147134	0.6877	0.992934	1.04	MIAT
rs6005101	27033321	C	psoriasis	-0.00046721	0.046911	0.316241	0.01202	0.991481	0.96	MIAT
rs6005102	27033414	G	psoriasis	-0.00046757	0.046753	0.316214	0.01148	0.9914	0.96	MIAT
rs542066655	27033625	A	psoriasis	0.0022485	0.1315	0.00555955	0.7567	0.960835	1.22	MIAT
rs141077095	27033799	T	psoriasis	-0.00067525	0.44131	0.0163443	0.2886	0.952888	0.942	MIAT
rs6005104	27033914	C	psoriasis	-0.001083	0.2996	0.0112338	0.9364	0.971274	0.909	MIAT
rs143195505	27033926	T	psoriasis	3.5767e-05	0.97224	0.0121114	0.2103	0.927279	1	MIAT
rs148233611	27033967	T	psoriasis	0.00030884	0.44923	0.0809992	0.5743	0.95128	1.03	MIAT
rs78176245	27033968	A	psoriasis	-0.0013737	0.37223	0.00511579	0.8643	0.974903	0.886	MIAT
rs59769796	27034139	A	psoriasis	-0.0011564	0.26845	0.011199	0.9364	0.974102	0.903	MIAT
rs34422027	27034351	G	psoriasis	-0.00053703	0.019659	0.343687	0.5699	0.987535	0.954	MIAT
rs112708610	27035095	G	psoriasis	0.0027211	0.048492	0.00668972	0.4302	0.933922	1.27	MIAT
rs5761652	27035265	G	psoriasis	0.00010904	0.63509	0.347737	0.8169	0.98657	1.01	MIAT
rs56384818	27035998	C	psoriasis	0.00053114	0.392	0.0335466	1	0.94409	1.05	MIAT
rs113371511	27036328	T	psoriasis	0.00052461	0.69588	0.00718619	0.02828	0.919057	1.05	MIAT
rs5997110	27036505	C	psoriasis	-0.00031596	0.14846	0.483354	0.3684	0.988407	0.972	MIAT
rs5761653	27036963	T	psoriasis	0.0010106	0.2403	0.0165659	0.2041	0.977783	1.09	MIAT
rs138602762	27037474	T	psoriasis	0.00058685	0.74248	0.00395787	1	0.936457	1.05	MIAT
rs5761654	27037688	C	psoriasis	0.00014658	0.51403	0.383709	0.8964	0.989795	1.01	MIAT
rs117144213	27037708	A	psoriasis	-0.00081609	0.080396	0.0605154	0.7118	0.952123	0.93	MIAT
rs55736010	27037787	G	psoriasis	0.00049538	0.47491	0.026435	0.2739	0.951697	1.04	MIAT
rs149610463	27037891	T	psoriasis	-0.00048696	0.46996	0.02909	0.6181	0.921217	0.958	MIAT
rs4822756	27037919	C	psoriasis	0.00015153	0.49979	0.383147	0.7176	0.991129	1.01	MIAT
rs10483126	27038299	C	psoriasis	0.00015592	0.49646	0.345471	0.6916	0.994209	1.01	MIAT
rs4822757	27038708	G	psoriasis	0.0004243	0.052194	0.464937	0.3075	0.993151	1.04	MIAT
rs5761655	27038853	G	psoriasis	0.00015183	0.50581	0.349729	0.8629	0.999263	1.01	MIAT
rs5752371	27038865	G	psoriasis	-0.0001387	0.5442	0.349	0.2421	genotyped	0.988	MIAT
rs77229052	27039145	C	psoriasis	0.00011147	0.84535	0.0381707	0.009147	0.983666	1.01	MIAT
rs73880144	27039347	T	psoriasis	-0.0010749	0.31013	0.0108323	0.9344	0.981009	0.909	MIAT
rs5761656	27039678	G	psoriasis	-0.00060201	0.15661	0.07072	0.4253	genotyped	0.948	MIAT
rs561372902	27039814	A	psoriasis	-0.0016826	0.42829	0.00288923	0.05924	0.900993	0.862	MIAT
rs147607957	27039893	T	psoriasis	-0.0017481	0.19831	0.00669464	0.6879	0.960172	0.857	MIAT
rs2017127	27039994	A	psoriasis	0.0003538	0.25645	0.142029	0.8337	0.99871	1.03	MIAT
rs117190020	27040082	A	psoriasis	-0.00057315	0.4668	0.0203208	0.1923	0.954495	0.951	MIAT
rs9625065	27040103	T	psoriasis	-0.00036761	0.23792	0.1427	0.7535	genotyped	0.968	MIAT
rs78164399	27040346	C	psoriasis	9.4681e-05	0.86816	0.0383051	0.006998	0.984182	1.01	MIAT
rs12628427	27040942	C	psoriasis	0.00032587	0.48031	0.0599867	0.3911	0.982276	1.03	MIAT
rs16982515	27041283	G	psoriasis	-8.4836e-05	0.83591	0.0788604	0.02349	0.965487	0.993	MIAT
rs190325753	27041310	T	psoriasis	0.00012741	0.92432	0.00737418	0.9061	0.900052	1.01	MIAT
rs9613234	27041513	C	psoriasis	-0.00034141	0.43953	0.0689351	0.2344	0.945085	0.97	MIAT
rs744016	27042106	C	psoriasis	-2.9651e-05	0.91895	0.1704	1.02e-07	genotyped	0.997	MIAT
rs67228032	27042552	C	psoriasis	0.00076734	0.29761	0.0224963	0.5309	0.988924	1.07	MIAT
rs5752372	27042828	A	psoriasis	-0.00017082	0.54649	0.1816	0.07363	genotyped	0.985	MIAT
rs763271	27043233	G	psoriasis	9.1601e-05	0.71505	0.257693	0.07854	0.977884	1.01	MIAT
rs113853484	27043250	C	psoriasis	0.00093519	0.18074	0.0265946	0.8909	0.934341	1.09	MIAT
rs763272	27043303	A	psoriasis	0.0010249	0.15603	0.0234518	0.7063	0.983934	1.09	MIAT
rs763273	27043594	C	psoriasis	-1.7214e-05	0.95258	0.172658	0.9096	0.988894	0.998	MIAT
rs2269671	27043728	T	psoriasis	-0.00062466	0.018726	0.221323	0.326	0.971257	0.946	MIAT
rs763274	27043811	A	psoriasis	0.00025297	0.29108	0.30024	0.6888	0.978508	1.02	MIAT
rs763275	27043883	C	psoriasis	-4.7945e-05	0.87259	0.158676	0.2065	0.993645	0.996	MIAT
rs5761658	27044184	T	psoriasis	-9.8803e-06	0.9736	0.159795	0.2081	0.990511	0.999	MIAT
rs4822758	27044317	C	psoriasis	2.7535e-05	0.90236	0.404221	0.1816	0.975448	1	MIAT
rs17405847	27044798	G	psoriasis	0.00017323	0.76083	0.0384641	0.01707	0.981604	1.02	MIAT
rs75130340	27045284	A	psoriasis	0.00049121	0.49199	0.0248747	0.5649	0.952858	1.04	MIAT
rs11913541	27045504	A	psoriasis	-0.00065999	0.04545	0.12854	0.4447	0.969059	0.943	MIAT
rs140002582	27045660	T	psoriasis	0.00076825	0.51212	0.00950546	0.9242	0.912846	1.07	MIAT
rs11913458	27045740	A	psoriasis	-0.0006657	0.042926	0.129502	0.3446	0.969521	0.943	MIAT
rs5761659	27045898	T	psoriasis	0.00041396	0.16879	0.157861	0.2597	0.981256	1.04	MIAT
rs67439309	27045955	G	psoriasis	0.00075097	0.30128	0.0234461	0.2506	0.977424	1.07	MIAT
rs58431693	27046180	A	psoriasis	0.00075256	0.30039	0.0234434	0.2834	0.976973	1.07	MIAT
rs75234394	27046591	A	psoriasis	0.00020882	0.71518	0.0379341	0.01554	0.986993	1.02	MIAT
rs4822760	27046662	T	psoriasis	-0.00025051	0.38337	0.177608	0.3255	0.982799	0.978	MIAT
rs4822761	27046685	C	psoriasis	0.0001413	0.5318	0.388276	0.8273	0.973052	1.01	MIAT
rs2331289	27047254	A	psoriasis	0.0002334	0.33832	0.284528	0.3022	0.975153	1.02	MIAT
rs4820694	27048007	T	psoriasis	0.00015384	0.49218	0.405719	0.6173	0.975689	1.01	MIAT
rs34730265	27048046	T	psoriasis	-0.00054707	0.089698	0.1346	0.7428	0.97354	0.953	MIAT
rs7290586	27048408	G	psoriasis	0.00025091	0.29658	0.290728	0.09353	0.9897	1.02	MIAT
rs5752373	27048588	G	psoriasis	0.00011542	0.69136	0.17328	0.3173	0.978372	1.01	MIAT
rs182418571	27048749	A	psoriasis	0.00084453	0.77657	0.00147702	1	0.902634	1.08	MIAT
rs16982543	27048858	C	psoriasis	-0.00013282	0.73782	0.0828771	0.1527	0.989338	0.988	MIAT
rs16982545	27048920	C	psoriasis	-0.00012951	0.74413	0.082837	0.1592	0.990665	0.989	MIAT
rs1018833	27049011	T	psoriasis	0.00015201	0.50351	0.370964	0.5931	0.980583	1.01	MIAT
rs16982551	27049032	G	psoriasis	-0.00012919	0.74473	0.0828378	0.1626	0.990818	0.989	MIAT
rs16982554	27049119	G	psoriasis	-0.00012973	0.74369	0.0828381	0.1626	0.99093	0.989	MIAT
rs5761661	27049979	T	psoriasis	0.00015967	0.48196	0.371699	0.6964	0.981194	1.01	MIAT
rs56310025	27050196	A	psoriasis	-0.00012225	0.75845	0.0824597	0.1608	0.990778	0.989	MIAT
rs117370913	27050684	T	psoriasis	0.00026445	0.64683	0.0368894	0.009012	0.996664	1.02	MIAT
rs34025137	27050834	T	psoriasis	-0.00084548	0.10543	0.0485986	0.7439	0.934849	0.928	MIAT
rs6005115	27050912	G	psoriasis	-9.699e-05	0.66033	0.432658	0.1635	0.987317	0.991	MIAT
rs5761662	27050953	A	psoriasis	0.00040291	0.13477	0.205132	0.4029	0.999402	1.04	MIAT
rs5752374	27050962	C	psoriasis	-3.5576e-05	0.87134	0.455399	0.3875	0.986577	0.997	MIAT
rs117000644	27050968	A	psoriasis	-0.00012474	0.75366	0.0824583	0.1575	0.991051	0.989	MIAT
rs739310	27051299	A	psoriasis	-0.00045213	0.093745	0.2052	0.9958	genotyped	0.961	MIAT
rs739311	27051338	C	psoriasis	-9.6078e-05	0.66327	0.432706	0.1625	0.987694	0.992	MIAT
rs5761663	27052334	C	psoriasis	0.000155	0.49479	0.37183	0.6965	0.981452	1.01	MIAT
rs56371714	27052449	T	psoriasis	0.00067618	0.35827	0.022753	0.3875	0.981428	1.06	MIAT
rs141031836	27052450	A	psoriasis	0.00026749	0.64303	0.0368849	0.009015	0.996946	1.02	MIAT
rs5752375	27052508	C	psoriasis	8.8364e-05	0.74965	0.195448	0.7978	0.982084	1.01	MIAT
rs55892869	27052557	T	psoriasis	0.0006729	0.35999	0.0229008	0.3671	0.978276	1.06	MIAT
rs9608515	27052582	C	psoriasis	8.9465e-05	0.74662	0.19548	0.8105	0.98176	1.01	MIAT
rs2157598	27052890	T	psoriasis	0.00013135	0.55096	0.455447	0.4179	0.983599	1.01	MIAT
rs5761664	27053120	T	psoriasis	0.00014884	0.51213	0.371799	0.7101	0.981373	1.01	MIAT
rs116451230	27053279	A	psoriasis	0.004542	0.15948	0.0012073	0.355	0.938019	1.49	MIAT
rs16982564	27054179	A	psoriasis	-0.00071575	0.02199	0.143913	0.7365	0.981432	0.939	MIAT
rs7284198	27054199	T	psoriasis	4.5661e-05	0.86896	0.195831	0.6279	0.981472	1	MIAT
rs16982565	27054209	T	psoriasis	8.3425e-05	0.8341	0.08165	0.03625	genotyped	1.01	MIAT
rs5752376	27054832	G	psoriasis	6.1078e-05	0.82562	0.195015	0.662	0.981198	1.01	MIAT
rs35778551	27054989	A	psoriasis	-0.00048605	0.097633	0.167864	0.5129	0.982069	0.958	MIAT
rs9613239	27055416	A	psoriasis	0.00023672	0.3771	0.21811	0.9226	0.963751	1.02	MIAT
rs74276996	27055518	G	psoriasis	0.00042023	0.11947	0.205193	0.4416	0.995026	1.04	MIAT
rs6005116	27056097	G	psoriasis	6.2693e-05	0.82111	0.195034	0.6579	0.980839	1.01	MIAT
rs9613240	27056334	A	psoriasis	6.0942e-05	0.82604	0.19498	0.6739	0.981321	1.01	MIAT
rs80337067	27056518	A	psoriasis	0.00032615	0.66959	0.02099	3.593e-15	genotyped	1.03	MIAT
rs11912702	27056763	G	psoriasis	-0.00072604	0.019691	0.144941	0.7234	0.982621	0.938	MIAT
rs56207652	27057263	A	psoriasis	-0.00011033	0.78372	0.0803931	0.06931	0.992413	0.99	MIAT
rs1981493	27057406	A	psoriasis	0.00027269	0.22486	0.402624	0.8605	0.971814	1.02	MIAT
rs5761665	27057439	G	psoriasis	-5.7605e-05	0.80362	0.348055	0.631	0.968503	0.995	MIAT
rs5752377	27057450	A	psoriasis	-4.6288e-05	0.8683	0.196269	0.4056	0.962256	0.996	MIAT
rs73163285	27057631	T	psoriasis	-0.00011052	0.78339	0.0803851	0.07606	0.992004	0.99	MIAT
rs6005119	27057987	A	psoriasis	-0.00020239	0.38545	0.325385	0.6967	0.989515	0.982	MIAT
rs2331290	27058525	T	psoriasis	-0.00064384	0.039964	0.142236	0.6985	0.985431	0.945	MIAT
rs2331291	27058821	T	psoriasis	-0.00064387	0.039942	0.142187	0.6829	0.986097	0.945	MIAT
rs5761666	27059005	G	psoriasis	0.00041111	0.15901	0.168299	0.9706	0.992228	1.04	MIAT
rs147059153	27059183	T	psoriasis	0.001652	0.39507	0.00338404	0.5876	0.923584	1.16	MIAT
rs76357418	27059301	C	psoriasis	-0.00074741	0.56997	0.00758745	0.2894	0.903111	0.936	MIAT
rs112782030	27059680	C	psoriasis	-0.00049969	0.7427	0.00566047	1	0.904174	0.957	MIAT
rs73163286	27059724	G	psoriasis	-0.00011496	0.82546	0.047099	0.07293	0.970134	0.99	MIAT
rs73163287	27059732	G	psoriasis	-0.0001232	0.75942	0.0803471	0.07747	0.991044	0.989	MIAT
rs5761668	27059838	T	psoriasis	0.00012977	0.66618	0.156198	0.3649	0.991381	1.01	MIAT
rs6519660	27060135	T	psoriasis	0.00025481	0.34146	0.218467	0.9185	0.964113	1.02	MIAT
rs36053931	27060536	C	psoriasis	-0.0005105	0.051711	0.222672	0.2364	0.991131	0.956	MIAT
rs4822763	27060641	T	psoriasis	0.00032695	0.31077	0.131931	0.5032	0.992035	1.03	MIAT
rs138730720	27060734	C	psoriasis	0.00035754	0.75438	0.00989632	0.3858	0.921095	1.03	MIAT
rs28459203	27060894	A	psoriasis	-8.4427e-05	0.76238	0.196087	0.3005	0.963107	0.993	MIAT
rs9608517	27060927	A	psoriasis	-0.00019617	0.39962	0.325515	0.7854	0.993074	0.983	MIAT
rs78699720	27061285	C	psoriasis	-0.00028567	0.62007	0.03684	3.48e-05	genotyped	0.975	MIAT
rs138639389	27061317	A	psoriasis	0.0022453	0.015036	0.0152339	0.628	0.922904	1.22	MIAT
rs5997112	27061791	A	psoriasis	0.00014576	0.50542	0.46783	0.2558	0.993835	1.01	MIAT
rs1061541	27061937	T	psoriasis	0.00028914	0.30647	0.181571	0.551	0.996013	1.03	MIAT
rs1061540	27062038	C	psoriasis	0.0001528	0.48485	0.470447	0.2219	0.99423	1.01	MIAT
rs12166567	27062122	C	psoriasis	0.00058294	0.057753	0.147857	0.2621	0.993997	1.05	MIAT
rs62224896	27062296	A	psoriasis	-0.00050387	0.11137	0.138344	0.5125	0.989539	0.956	MIAT
rs73163288	27062592	A	psoriasis	-6.7514e-05	0.86756	0.0791632	0.06692	0.992358	0.994	MIAT
rs2301523	27062669	A	psoriasis	-0.00049201	0.12072	0.137385	0.6958	0.992549	0.957	MIAT
rs2301524	27062795	T	psoriasis	0.00060143	0.050612	0.147058	0.3333	0.995728	1.05	MIAT
rs61648805	27062928	G	psoriasis	0.00063323	0.35604	0.0259511	0.1189	0.996817	1.06	MIAT
rs200989430	27063396	T	psoriasis	-1.2506e-05	0.97523	0.0804661	0.1465	0.987612	0.999	MIAT
rs73163291	27063621	C	psoriasis	-4.4226e-05	0.91286	0.0794234	0.06788	0.99282	0.996	MIAT
rs4822764	27063706	T	psoriasis	0.00020116	0.44964	0.221788	0.9919	0.96724	1.02	MIAT
rs4822766	27063804	C	psoriasis	0.00020192	0.44794	0.221774	0.9879	0.96724	1.02	MIAT
rs4274	27064287	A	psoriasis	0.00059743	0.052094	0.147021	0.3547	0.996616	1.05	MIAT
rs118107656	27064356	T	psoriasis	-0.00075367	0.49031	0.0108227	0.1735	0.923823	0.936	MIAT
rs3752603	27064494	T	psoriasis	0.00011653	0.594	0.455624	0.9835	0.99963	1.01	MIAT
rs34403716	27064576	A	psoriasis	-0.00051908	0.10206	0.136813	0.5959	0.992903	0.955	MIAT
rs73163292	27064979	C	psoriasis	-4.6702e-05	0.90799	0.0794331	0.06446	0.992969	0.996	MIAT
rs6005121	27065117	G	psoriasis	0.00031428	0.26758	0.17974	0.7118	0.999378	1.03	MIAT
rs35955962	27065224	A	psoriasis	-0.0005191	0.10204	0.136811	0.5959	0.992963	0.955	MIAT
rs56378339	27065368	T	psoriasis	0.00059954	0.38135	0.0260255	0.1044	0.998274	1.05	MIAT
rs34311659	27065477	T	psoriasis	-0.00051908	0.10205	0.136811	0.5959	0.99299	0.955	MIAT
rs4822767	27065681	A	psoriasis	0.00047182	0.11772	0.153712	0.5831	0.999463	1.04	MIAT
rs35870418	27065794	T	psoriasis	-0.00051924	0.10193	0.136813	0.5959	0.993023	0.955	MIAT
rs7985	27066535	A	psoriasis	-8.3086e-05	0.70502	0.4562	0.05136	genotyped	0.993	MIAT
rs73163297	27066734	C	psoriasis	-0.00021946	0.86568	0.00770638	0.8104	0.915677	0.981	MIAT
rs4280	27067045	T	psoriasis	0.00012293	0.57384	0.456164	0.9616	0.999484	1.01	MIAT
rs1894720	27067224	T	psoriasis	0.00012	0.58304	0.455585	0.9534	0.999554	1.01	MIAT
rs73163299	27067643	G	psoriasis	0.00012131	0.57889	0.455624	0.9096	0.999693	1.01	MIAT
rs8142049	27067792	C	psoriasis	-4.321e-05	0.84871	0.3653	0.9002	genotyped	0.996	MIAT
rs5761670	27068052	T	psoriasis	-9.178e-05	0.74174	0.197205	0.2014	0.964943	0.992	MIAT
rs73163300	27068071	A	psoriasis	-5.9737e-05	0.88248	0.0794274	0.06274	0.992979	0.995	MIAT
rs73165403	27068469	G	psoriasis	-0.00023207	0.92328	0.002163	0.4143	0.939043	0.98	MIAT
rs5761671	27068592	A	psoriasis	0.00046565	0.12383	0.1534	0.2569	genotyped	1.04	MIAT
rs9625066	27068702	A	psoriasis	-0.00024471	0.33538	0.243071	0.9555	0.997194	0.979	MIAT
rs11704138	27068727	C	psoriasis	-0.00021471	0.92699	0.00229953	0.4424	0.939113	0.981	MIAT
rs55969394	27068998	T	psoriasis	0.00059962	0.38145	0.026026	0.1197	0.997406	1.05	MIAT
rs9620625	27069254	T	psoriasis	8.2982e-06	0.98356	0.0800877	0.05515	0.991057	1	MIAT
rs55901610	27069310	C	psoriasis	-0.0023831	0.23231	0.00303589	0.2684	0.979197	0.81	MIAT
rs5761672	27069439	A	psoriasis	0.00012905	0.55518	0.455251	0.9014	0.998297	1.01	MIAT
rs6005127	27069557	T	psoriasis	-0.00025223	0.32073	0.243402	0.9778	0.99629	0.978	MIAT
rs5752378	27069835	A	psoriasis	-0.00010428	0.70802	0.197626	0.2137	0.963466	0.991	MIAT
rs1018834	27069907	T	psoriasis	0.00044825	0.044131	0.397722	0.6406	0.996222	1.04	MIAT
rs737766	27070253	C	psoriasis	-0.0011877	0.31845	0.00910013	0.5412	0.919145	0.9	MIAT
rs55857368	27070304	T	psoriasis	0.00060292	0.3792	0.0260296	0.1188	0.995242	1.05	MIAT
rs713720	27070451	G	psoriasis	0.00046292	0.1256	0.153434	0.5648	0.995881	1.04	MIAT
rs4822768	27070749	T	psoriasis	0.0004898	0.027617	0.40098	0.5269	0.995953	1.04	MIAT
rs7293223	27071694	A	psoriasis	-0.00012955	0.64223	0.197027	0.2105	0.962269	0.989	MIAT
rs1045362	27072140	A	psoriasis	0.00049151	0.027089	0.400948	0.5014	0.995891	1.04	MIAT
rs1045363	27072146	T	psoriasis	-9.0696e-05	0.74474	0.197534	0.2472	0.963106	0.992	MIAT
rs143148654	27072686	G	psoriasis	0.0021449	0.16068	0.00555569	1	0.913535	1.21	MIAT
rs117256289	27072729	G	psoriasis	-0.0014293	0.11085	0.0157976	0.6521	0.941927	0.881	MIAT
rs4822769	27072961	C	psoriasis	0.00048668	0.028675	0.400895	0.5259	0.995378	1.04	MIAT
rs6005130	27073259	G	psoriasis	0.00048769	0.028348	0.400897	0.5283	0.995374	1.04	MIAT
rs6005131	27073339	G	psoriasis	-0.00017346	0.53788	0.192636	0.422	0.96022	0.985	MIAT
rs34144672	27073550	C	psoriasis	-0.00059882	0.056722	0.140723	0.4639	0.989069	0.948	MIAT
rs739312	27073858	C	psoriasis	0.00062506	0.042176	0.14735	0.4497	0.994244	1.06	MIAT
rs4822770	27074049	G	psoriasis	0.00053255	0.016839	0.400139	0.4106	0.992427	1.05	MIAT
rs76191791	27074257	A	psoriasis	-8.7747e-05	0.82926	0.0784197	0.04285	0.990923	0.992	MIAT
rs56186420	27074303	T	psoriasis	0.00046063	0.50204	0.026058	0.08337	0.992295	1.04	MIAT
rs763276	27074401	T	psoriasis	0.0005291	0.017336	0.399965	0.2811	0.996065	1.05	MIAT
rs736689	27074685	G	psoriasis	0.00051956	0.019283	0.402072	0.31	0.99743	1.05	MIAT
rs736690	27074768	G	psoriasis	0.00022554	0.30204	0.464592	0.8449	0.997048	1.02	MIAT
rs763277	27074845	A	psoriasis	0.00052694	0.017629	0.401762	0.3523	0.998083	1.05	MIAT
rs73165414	27074918	G	psoriasis	0.0031497	0.091884	0.00358063	1	0.947071	1.32	MIAT
rs737262	27075196	T	psoriasis	0.0005183	0.019539	0.402899	0.3788	0.997709	1.05	MIAT
rs60204004	27075281	C	psoriasis	-0.00016964	0.64827	0.0950924	0.3151	0.994269	0.985	MIAT
rs4820695	27075975	A	psoriasis	0.00028695	0.21751	0.328669	0.9938	0.990822	1.03	MIAT
rs12628661	27076033	T	psoriasis	-0.00016801	0.65137	0.0950495	0.3199	0.995019	0.985	MIAT
rs744018	27076305	T	psoriasis	0.00056393	0.011337	0.4012	0.3585	genotyped	1.05	MIAT
rs5761676	27076576	T	psoriasis	0.00051988	0.019123	0.401927	0.3923	0.999044	1.05	MIAT
rs5761677	27076596	C	psoriasis	0.00051936	0.019231	0.402055	0.3943	0.999605	1.05	MIAT
rs5761678	27076850	C	psoriasis	0.00051449	0.020403	0.402063	0.3826	0.999356	1.05	MIAT
rs6005133	27076984	T	psoriasis	0.00021827	0.31761	0.464425	0.8022	0.998186	1.02	MIAT
rs12627791	27077074	G	psoriasis	-0.00016409	0.65897	0.0951026	0.3012	0.994619	0.986	MIAT
rs5761679	27077231	T	psoriasis	0.00021794	0.31838	0.464439	0.7837	0.998004	1.02	MIAT
rs545507053	27077930	A	psoriasis	0.0043947	0.18598	0.00116633	1	0.912353	1.47	MIAT
rs9620627	27078466	G	psoriasis	8.6949e-05	0.82981	0.0794432	0.0505	0.990657	1.01	MIAT
rs5752379	27078560	C	psoriasis	0.00052538	0.017947	0.40203	0.3745	0.998175	1.05	MIAT
rs74596043	27078755	C	psoriasis	0.00033684	0.56078	0.0366435	0.03421	0.997305	1.03	MIAT
rs143001669	27078817	A	psoriasis	0.0014602	0.093647	0.0170735	0.6306	0.924239	1.14	MIAT
rs5752380	27078836	A	psoriasis	0.00052472	0.018096	0.402019	0.3764	0.998087	1.05	MIAT
rs4822771	27078955	T	psoriasis	0.00052468	0.0181	0.402012	0.3707	0.998129	1.05	MIAT
rs4822772	27079188	T	psoriasis	0.00052076	0.018987	0.40192	0.3612	0.998079	1.05	MIAT
rs5761680	27080150	C	psoriasis	0.00049321	0.03185	0.342632	0.8496	0.99584	1.04	MIAT
rs528275426	27080864	T	psoriasis	0.0016712	0.53592	0.00175223	0.6318	0.920759	1.16	MIAT
rs78844883	27081196	G	psoriasis	3.0111e-05	0.94077	0.07896	0.07028	0.993172	1	MIAT
rs763278	27081362	C	psoriasis	0.00058398	0.0517	0.15672	0.7274	0.99273	1.05	MIAT
rs117234779	27081477	G	psoriasis	-0.0019149	0.036497	0.0148936	0.3414	0.956842	0.844	MIAT
rs78590162	27081945	T	psoriasis	2.6929e-05	0.94701	0.0789749	0.05531	0.993728	1	MIAT
rs2051652	27081979	C	psoriasis	0.00062832	0.050765	0.131768	0.4921	0.999919	1.06	MIAT
rs2051653	27082103	A	psoriasis	0.000548	0.02014	0.306949	0.3398	0.999808	1.05	MIAT
rs2051654	27082153	G	psoriasis	-0.00068759	0.033503	0.1311	0.02786	genotyped	0.941	MIAT
rs74974450	27082543	A	psoriasis	0.00024152	0.67289	0.0375312	0.02898	0.998556	1.02	MIAT
rs874645	27082723	T	psoriasis	0.00054658	0.02047	0.306923	0.3418	0.999858	1.05	MIAT
rs9625070	27082992	A	psoriasis	0.00062209	0.053202	0.131689	0.5109	0.999529	1.06	MIAT
rs5761682	27083706	C	psoriasis	0.00054809	0.020128	0.306866	0.3459	0.999904	1.05	MIAT
rs4822773	27084303	T	psoriasis	0.00054816	0.020113	0.306865	0.3459	0.99992	1.05	MIAT
rs4820696	27084655	T	psoriasis	0.00057071	0.015672	0.3071	0.7573	genotyped	1.05	MIAT
rs146427908	27084689	T	psoriasis	-0.00063242	0.47361	0.0164516	0.4652	0.936035	0.946	MIAT
rs5761683	27084772	G	psoriasis	0.00054819	0.020107	0.306862	0.35	0.999942	1.05	MIAT
rs141396637	27084991	G	psoriasis	0.00069194	0.56042	0.00926232	0.07613	0.907565	1.06	MIAT
rs1573764	27085223	A	psoriasis	0.00053852	0.022366	0.307363	0.3736	0.999667	1.05	MIAT
rs73425698	27085310	G	psoriasis	-0.00064487	0.13081	0.0710631	0.08725	0.984719	0.945	MIAT
rs1573766	27085338	A	psoriasis	0.00053836	0.022405	0.307358	0.3715	0.999673	1.05	MIAT
rs1573767	27085491	T	psoriasis	0.00057917	0.05362	0.156734	0.7081	0.993001	1.05	MIAT
rs1573768	27085554	T	psoriasis	0.00053823	0.022437	0.307361	0.3715	0.999681	1.05	MIAT
rs8139337	27085711	A	psoriasis	-0.0019317	0.035186	0.0148593	0.5125	0.9562	0.843	MIAT
rs59918572	27086087	G	psoriasis	-0.00064498	0.13075	0.0710626	0.08725	0.984698	0.945	MIAT
rs2187965	27086367	T	psoriasis	0.00053782	0.02254	0.30736	0.3715	0.999668	1.05	MIAT
rs2001157	27086668	T	psoriasis	0.00053783	0.022537	0.30736	0.3715	0.999666	1.05	MIAT
rs191468648	27086816	A	psoriasis	0.0026557	0.10256	0.00490396	0.8531	0.91266	1.26	MIAT
rs2001158	27086990	T	psoriasis	0.00053887	0.022283	0.307398	0.3715	0.999555	1.05	MIAT
rs73425702	27087307	A	psoriasis	-0.00065145	0.12706	0.0710328	0.09192	0.984419	0.944	MIAT
rs5761685	27087385	T	psoriasis	0.00061973	0.053985	0.131841	0.4737	0.999302	1.06	MIAT
rs5761686	27087410	G	psoriasis	0.00053746	0.022628	0.307534	0.3759	0.99939	1.05	MIAT
rs5761687	27087647	C	psoriasis	0.00053797	0.022512	0.307385	0.3845	0.999501	1.05	MIAT
rs4822775	27088015	C	psoriasis	0.0005382	0.022457	0.307387	0.3845	0.999456	1.05	MIAT
rs4820698	27088080	C	psoriasis	0.00053821	0.022456	0.307387	0.3845	0.999457	1.05	MIAT
rs4822776	27088211	A	psoriasis	0.00015496	0.5102	0.311849	0.7624	0.996826	1.01	MIAT
rs4820699	27088298	C	psoriasis	0.00053828	0.02244	0.307386	0.3845	0.999437	1.05	MIAT
rs4822777	27088391	A	psoriasis	0.0005397	0.022142	0.307406	0.3867	0.998545	1.05	MIAT
rs766070	27088638	T	psoriasis	0.00053393	0.023565	0.307875	0.3697	0.998272	1.05	MIAT
rs766071	27088786	A	psoriasis	0.00053299	0.023853	0.307564	0.3759	0.998139	1.05	MIAT
rs713940	27089325	C	psoriasis	0.00053707	0.022828	0.307831	0.3633	0.997293	1.05	MIAT
rs117657844	27089329	T	psoriasis	1.4345e-05	0.97176	0.0790485	0.05681	0.99273	1	MIAT
rs739313	27089570	G	psoriasis	0.00056412	0.060151	0.157145	0.7817	0.990674	1.05	MIAT
rs2032576	27089655	T	psoriasis	0.00017564	0.42384	0.439633	0.9724	0.996622	1.02	MIAT
rs74384672	27089752	T	psoriasis	-0.00022965	0.68878	0.0375	0.4106	genotyped	0.98	MIAT
rs55698505	27090179	T	psoriasis	-3.0032e-06	0.99254	0.1327	0.6562	0.99491	1	MIAT
rs5761688	27090640	G	psoriasis	0.00050803	0.087	0.163307	0.9349	0.981524	1.05	MIAT
rs4820700	27091167	C	psoriasis	0.0002006	0.37812	0.36049	0.1411	0.992331	1.02	MIAT
rs4822778	27091248	C	psoriasis	0.00020075	0.37786	0.360352	0.1303	0.991667	1.02	MIAT
rs2331292	27091364	C	psoriasis	0.00056893	0.058332	0.157165	0.8365	0.987866	1.05	MIAT
rs74988832	27091449	T	psoriasis	-0.00092198	0.18297	0.02554	0.01029	genotyped	0.922	MIAT
rs975325	27091750	A	psoriasis	-0.0001185	0.75036	0.0949085	0.4022	0.991877	0.99	MIAT
rs5752383	27092259	C	psoriasis	0.00068058	0.008964	0.228065	0.7377	0.989842	1.06	MIAT
rs117889446	27092913	T	psoriasis	0.00010546	0.90278	0.0178057	0.5891	0.905653	1.01	MIAT
rs60695668	27092955	T	psoriasis	-0.00068304	0.11136	0.0708902	0.118	0.976371	0.941	MIAT
rs117683914	27093045	T	psoriasis	1.8352e-05	0.9639	0.0790529	0.05823	0.991537	1	MIAT
rs1543808	27093109	G	psoriasis	0.00010266	0.76379	0.115477	0.9467	0.992393	1.01	MIAT
rs111526800	27093114	A	psoriasis	0.003457	0.008749	0.00710768	0.3905	0.962351	1.36	MIAT
rs1543809	27093202	A	psoriasis	5.8465e-05	0.81653	0.248408	0.6216	0.999352	1.01	MIAT
rs141524884	27093370	A	psoriasis	-9.8196e-05	0.92595	0.0114556	0.06215	0.928029	0.991	MIAT
rs971280	27093508	A	psoriasis	-7.7806e-05	0.75811	0.2484	0.06441	genotyped	0.993	MIAT
rs746452999	27093659	T	psoriasis	-0.0018449	0.47099	0.00190154	0.3564	0.949886	0.85	MIAT
rs2331293	27094025	T	psoriasis	0.0001101	0.74741	0.115604	1	0.990688	1.01	MIAT
rs143607502	27094188	T	psoriasis	-0.00034384	0.74593	0.0115133	0.09149	0.921866	0.97	MIAT
rs2157599	27094241	C	psoriasis	0.00021159	0.35373	0.360445	0.1381	0.987642	1.02	MIAT
rs141213969	27094467	G	psoriasis	0.0011936	0.51464	0.00385882	1	0.914951	1.11	MIAT
rs62222975	27094788	G	psoriasis	-0.00011045	0.76736	0.0949223	0.3963	0.986757	0.99	MIAT
rs978695	27095014	T	psoriasis	0.00010224	0.76544	0.115641	0.9667	0.985557	1.01	MIAT
rs28613882	27095262	G	psoriasis	-0.0011697	0.07747	0.02774	0.9748	genotyped	0.902	MIAT
rs117051814	27095301	A	psoriasis	1.9425e-05	0.9618	0.079101	0.05247	0.990172	1	MIAT
rs2331294	27095710	A	psoriasis	6.8414e-05	0.78702	0.248227	0.6054	0.989861	1.01	MIAT
rs2331295	27095712	A	psoriasis	0.00015612	0.60802	0.153026	0.5805	0.984998	1.01	MIAT
rs73411393	27095757	T	psoriasis	-0.00067121	0.11959	0.0708779	0.09708	0.966362	0.942	MIAT
rs2331296	27095772	C	psoriasis	6.5722e-05	0.79516	0.248376	0.6087	0.989985	1.01	MIAT
rs7291023	27095998	A	psoriasis	-8.5806e-05	0.81818	0.0951949	0.42	0.985414	0.992	MIAT
rs184472401	27096032	G	psoriasis	-0.0007246	0.76294	0.00219146	0.686	0.938281	0.938	MIAT
rs117122652	27096328	C	psoriasis	1.8027e-05	0.96454	0.0791076	0.05097	0.990161	1	MIAT
rs6005141	27096893	A	psoriasis	6.5871e-05	0.79471	0.248376	0.6087	0.989967	1.01	MIAT
rs144856128	27097067	T	psoriasis	-0.00030898	0.77171	0.011455	0.2695	0.913879	0.973	MIAT
rs117371019	27097825	T	psoriasis	0.00019482	0.73438	0.0379176	0.02834	0.980398	1.02	MIAT
rs5761690	27097842	G	psoriasis	6.2466e-05	0.80509	0.248437	0.6216	0.989904	1.01	MIAT
rs117859204	27098283	T	psoriasis	0.00025958	0.65205	0.0374954	0.02584	0.986341	1.02	MIAT
rs5752384	27098841	T	psoriasis	0.00058553	0.052271	0.157144	0.8113	0.980077	1.05	MIAT
rs5761691	27098842	G	psoriasis	0.00061169	0.058993	0.131672	0.4868	0.985298	1.06	MIAT
rs9625074	27099288	T	psoriasis	0.00061173	0.058976	0.131671	0.4868	0.985279	1.06	MIAT
rs4820701	27099768	A	psoriasis	0.00021137	0.35543	0.360237	0.1108	0.982329	1.02	MIAT
rs138153428	27099830	T	psoriasis	2.2054e-05	0.95661	0.0791826	0.06515	0.990112	1	MIAT
rs149259732	27099987	A	psoriasis	2.1777e-05	0.95715	0.0791894	0.06347	0.99008	1	MIAT
rs6005142	27100019	G	psoriasis	9.7756e-05	0.77566	0.115618	0.9667	0.983769	1.01	MIAT
rs73165442	27100562	A	psoriasis	0.0010356	0.27881	0.01319	0.05245	genotyped	1.1	MIAT
rs9625075	27100912	T	psoriasis	-8.1452e-05	0.82731	0.0951643	0.3917	0.98502	0.993	MIAT
rs5761692	27101376	T	psoriasis	0.00058103	0.054106	0.157191	0.7914	0.979816	1.05	MIAT
rs79996779	27102141	T	psoriasis	2.1879e-05	0.95696	0.0791824	0.06515	0.990096	1	MIAT
rs5761693	27102559	A	psoriasis	6.3804e-05	0.80106	0.248328	0.6183	0.989627	1.01	MIAT
rs58372440	27103536	T	psoriasis	-0.00067945	0.11524	0.0708948	0.08684	0.96515	0.942	MIAT
rs1894624	27103676	G	psoriasis	0.0004303	0.050133	0.47693	0.7371	0.983191	1.04	MIAT
rs5761694	27103786	G	psoriasis	0.00014567	0.63206	0.153311	0.5326	0.984465	1.01	MIAT
rs4822779	27104302	T	psoriasis	0.00059381	0.049295	0.156756	0.8411	0.979754	1.05	MIAT
rs11090453	27104440	C	psoriasis	-8.5721e-05	0.81838	0.0952012	0.4143	0.984964	0.992	MIAT
rs137999730	27104562	G	psoriasis	0.00017344	0.88389	0.00921687	0.7531	0.914485	1.02	MIAT
rs117983666	27104620	T	psoriasis	0.0053629	0.033729	0.0020372	0.6461	0.913116	1.61	MIAT
rs149487282	27104690	G	psoriasis	0.0015375	0.080227	0.0160886	0.7911	0.963287	1.15	MIAT
rs9613255	27104705	G	psoriasis	0.00042974	0.050426	0.477054	0.7423	0.983621	1.04	MIAT
rs185084653	27104837	T	psoriasis	0.0014916	0.090788	0.0160133	0.7902	0.961149	1.14	MIAT
rs143273964	27104838	A	psoriasis	0.00059188	0.64674	0.00773395	0.3506	0.921109	1.05	MIAT
rs554527369	27105717	T	psoriasis	-0.0011529	0.48844	0.00453392	0.5524	0.936707	0.903	MIAT
rs5761695	27105857	C	psoriasis	0.00067521	0.0097958	0.228566	0.7417	0.980472	1.06	MIAT
rs188350837	27106408	G	psoriasis	0.0012256	0.69933	0.00130117	1	0.901276	1.11	MIAT
rs117274373	27107115	T	psoriasis	0.00084984	0.33703	0.01545	0.0488	genotyped	1.08	MIAT
rs11703633	27107544	G	psoriasis	-9.9828e-05	0.78929	0.0950817	0.4139	0.984134	0.991	MIAT
rs72617273	27108047	T	psoriasis	0.00061635	0.057163	0.131646	0.4681	0.984823	1.06	MIAT
rs5752386	27108217	A	psoriasis	0.00010378	0.76257	0.115351	0.9599	0.982075	1.01	MIAT
rs5752387	27108313	A	psoriasis	0.00058074	0.05425	0.157206	0.7814	0.979519	1.05	MIAT
rs9680723	27108660	G	psoriasis	0.00061622	0.057219	0.131647	0.4727	0.984784	1.06	MIAT
rs5761696	27108681	A	psoriasis	9.8288e-05	0.7748	0.115354	0.9933	0.982017	1.01	MIAT
rs139514623	27108903	A	psoriasis	0.0014806	0.3302	0.0056931	1	0.901288	1.14	MIAT
rs4822780	27109000	G	psoriasis	0.00057541	0.056487	0.157234	0.7914	0.979424	1.05	MIAT
rs5017272	27109033	T	psoriasis	0.00042853	0.050206	0.4778	0.2406	genotyped	1.04	MIAT
rs4820702	27109112	G	psoriasis	0.00037679	0.11465	0.348759	0.7057	0.913308	1.03	MIAT
rs140369746	27109355	T	psoriasis	0.00026034	0.65121	0.0374926	0.02583	0.985713	1.02	MIAT
rs5752388	27109475	C	psoriasis	7.2003e-05	0.77623	0.248271	0.599	0.988871	1.01	MIAT
rs8142103	27109887	T	psoriasis	-0.00193	0.036023	0.0148508	0.5125	0.949649	0.843	MIAT
rs1573719	27110019	T	psoriasis	0.0005941	0.04728	0.160835	0.8341	0.97582	1.05	MIAT
rs73413533	27110031	A	psoriasis	-0.00068491	0.11305	0.0706855	0.08132	0.964259	0.941	MIAT
rs5761697	27110259	T	psoriasis	6.9645e-05	0.78335	0.248325	0.6087	0.988897	1.01	MIAT
rs5752389	27110386	G	psoriasis	6.8749e-05	0.78607	0.248302	0.6055	0.988992	1.01	MIAT
rs5761698	27110827	T	psoriasis	0.00043312	0.048842	0.481035	0.9836	0.980759	1.04	MIAT
rs9613256	27110974	T	psoriasis	0.00016035	0.49847	0.313727	0.766	0.980125	1.01	MIAT
rs5761699	27111321	C	psoriasis	6.7894e-05	0.7887	0.248273	0.615	0.988617	1.01	MIAT
rs190807081	27111384	A	psoriasis	-0.0033722	0.10204	0.00299472	0.5555	0.928574	0.742	MIAT
rs12330046	27111968	A	psoriasis	2.2887e-05	0.9435	0.132599	0.7214	0.984482	1	MIAT
rs78965543	27112104	G	psoriasis	0.00026033	0.6513	0.0374871	0.02581	0.985426	1.02	MIAT
rs117874088	27112205	G	psoriasis	-0.0019675	0.033439	0.0147843	0.2817	0.944092	0.84	MIAT
rs9613257	27112693	G	psoriasis	0.00016786	0.47852	0.313986	0.7389	0.979854	1.01	MIAT
rs5761700	27112769	G	psoriasis	0.00056174	0.080977	0.134042	0.2846	0.982327	1.05	MIAT
rs73165456	27113096	G	psoriasis	-0.0010464	0.27665	0.0130603	0.1769	0.994791	0.912	MIAT
rs739223	27113511	T	psoriasis	0.00055371	0.068566	0.154911	0.9531	0.976416	1.05	MIAT
rs739224	27113514	T	psoriasis	0.00056476	0.063541	0.154395	0.9634	0.976909	1.05	MIAT
rs9613258	27113697	G	psoriasis	0.00015223	0.49906	0.391345	0.763	0.980395	1.01	MIAT
rs739225	27113741	A	psoriasis	0.00065686	0.012468	0.226206	0.9105	0.976837	1.06	MIAT
rs118041889	27113823	G	psoriasis	3.7477e-05	0.92596	0.0801548	0.03816	0.989019	1	MIAT
rs76153943	27114504	T	psoriasis	-0.0017462	0.00076358	0.0488225	0.3222	0.944477	0.857	MIAT
rs4820703	27114658	C	psoriasis	0.00057319	0.060349	0.154254	0.932	0.972466	1.05	MIAT
rs74721354	27115043	C	psoriasis	0.00030281	0.60363	0.0372512	0.06771	0.96661	1.03	MIAT
rs4822781	27115832	A	psoriasis	0.00047772	0.034079	0.422641	0.9686	0.951788	1.04	MIAT
rs118167786	27115907	T	psoriasis	-2.2046e-06	0.99569	0.0782639	0.07157	0.986822	1	MIAT
rs117244584	27116037	A	psoriasis	-0.00095415	0.074854	0.0477502	0.7416	0.902588	0.919	MIAT
rs74933299	27116267	A	psoriasis	0.0001909	0.60903	0.09431	0.1531	genotyped	1.02	MIAT
rs142824533	27116296	G	psoriasis	0.00131	0.39808	0.0054374	0.0562	0.912797	1.12	MIAT
rs5761701	27116364	A	psoriasis	0.00014754	0.55961	0.273077	0.5022	0.931063	1.01	MIAT
rs5761702	27116420	C	psoriasis	-4.6394e-05	0.89855	0.09943	0.7962	genotyped	0.996	MIAT
rs35345163	27116568	G	psoriasis	-0.00041847	0.073887	0.38314	0.01874	0.913063	0.964	MIAT
rs74357507	27117240	G	psoriasis	-0.00053292	0.5169	0.01783	0.2395	genotyped	0.954	MIAT
rs145899791	27117453	A	psoriasis	0.00050713	0.70285	0.00728641	0.158	0.921732	1.05	MIAT
rs4822782	27117672	G	psoriasis	0.00027099	0.24256	0.383817	0.1073	0.930519	1.02	MIAT
rs5761703	27117690	G	psoriasis	0.00017286	0.48012	0.296187	0.1529	0.945607	1.02	MIAT
rs35420034	27118048	A	psoriasis	0.0026874	0.0068962	0.0134512	0.2967	0.902035	1.27	MIAT
rs2001121	27118181	G	psoriasis	-3.4233e-05	0.87602	0.491982	0.1084	0.985762	0.997	MIAT
rs62222982	27118389	A	psoriasis	-1.2989e-05	0.96851	0.127454	0.3026	0.983727	0.999	MIAT
rs8139445	27118416	G	psoriasis	-2.7176e-05	0.90501	0.364063	0.9236	0.985425	0.998	MIAT
rs5761704	27119061	T	psoriasis	-7.5563e-05	0.72955	0.492156	0.1107	0.99374	0.993	MIAT
rs5752390	27119619	T	psoriasis	6.6551e-05	0.76085	0.4919	0.004274	genotyped	1.01	MIAT
rs34411616	27119629	T	psoriasis	-7.5599e-05	0.81629	0.129045	0.2433	0.993363	0.993	MIAT
rs118080589	27119660	A	psoriasis	0.00044379	0.62895	0.0145229	0.767	0.977709	1.04	MIAT
rs35891227	27119714	C	psoriasis	-5.4794e-05	0.86645	0.12871	0.3127	0.992939	0.995	MIAT
rs6005148	27119905	T	psoriasis	0.00022862	0.4552	0.149144	0.2968	0.992667	1.02	MIAT
rs6005149	27119970	C	psoriasis	0.0017661	0.28605	0.00475491	1	0.91855	1.17	MIAT
rs75634099	27120203	C	psoriasis	0.00032036	0.70029	0.0177755	0.8449	0.973083	1.03	MIAT
rs34504485	27120359	G	psoriasis	2.6612e-05	0.93501	0.1279	0.2219	genotyped	1	MIAT
rs12159376	27120433	T	psoriasis	-0.00018191	0.47068	0.250456	0.8553	0.98903	0.984	MIAT
rs117656360	27120699	A	psoriasis	-0.00051433	0.46343	0.02473	0.8321	genotyped	0.956	MIAT
rs117656061	27120704	T	psoriasis	0.00040556	0.65796	0.0145486	0.7235	0.980613	1.04	MIAT
rs79146148	27120819	G	psoriasis	-0.00038118	0.84537	0.00321182	1	0.943979	0.967	MIAT
rs183632486	27120922	G	psoriasis	0.0033519	0.28628	0.00131993	1	0.9006	1.34	MIAT
rs2001122	27121273	T	psoriasis	-0.00018544	0.41148	0.371508	0.03549	0.997196	0.984	MIAT
rs5761705	27121364	G	psoriasis	-0.00026671	0.31984	0.209534	0.8771	0.992201	0.977	MIAT
rs73165467	27121456	C	psoriasis	-0.00031624	0.35222	0.116699	0.482	0.991114	0.972	MIAT
rs77344960	27121907	G	psoriasis	0.00064585	0.47925	0.0146189	0.6809	0.982368	1.06	MIAT
rs2331327	27122082	G	psoriasis	-0.0003099	0.36161	0.116605	0.4665	0.993348	0.973	MIAT
rs57673854	27122187	A	psoriasis	0.0020654	0.21801	0.00460718	1	0.910034	1.2	MIAT
rs186703471	27122271	A	psoriasis	0.0011939	0.61453	0.00229417	0.667	0.913338	1.11	MIAT
rs187176031	27122336	G	psoriasis	0.00073908	0.69166	0.00371597	0.6311	0.917194	1.07	MIAT
rs6005150	27122480	T	psoriasis	-0.0001683	0.45624	0.3714	0.005989	genotyped	0.985	MIAT
rs118046679	27122634	A	psoriasis	-0.00018784	0.92347	0.00319978	1	0.948117	0.984	MIAT
rs5752392	27122923	G	psoriasis	-0.00025078	0.41285	0.1492	0.1959	genotyped	0.978	MIAT
rs28696717	153465563	G	psoriasis	-0.00062707	0.099205	0.093397	0.3002	0.960118	0.946	S100A4
rs2879553	153466377	C	psoriasis	-4.3237e-05	0.8991	0.119127	0.5131	0.966989	0.996	S100A4
rs6672390	153466704	G	psoriasis	1.8478e-05	0.95623	0.121999	0.5612	0.971586	1	S100A4
rs61804049	153466944	T	psoriasis	-0.00096048	0.10186	0.03587	0.2293	genotyped	0.919	S100A4
rs6660055	153467074	T	psoriasis	-1.9661e-05	0.95335	0.122304	0.5407	0.972162	0.998	S100A4
rs16835366	153468106	A	psoriasis	-1.0486e-05	0.97506	0.122747	0.4001	0.973309	0.999	S100A4
rs112950866	153468497	A	psoriasis	0.0012235	0.25499	0.0113426	0.05715	0.911448	1.11	S100A4
rs28676601	153468681	T	psoriasis	-2.0771e-05	0.95076	0.12187	0.3977	0.97757	0.998	S100A4
rs16835368	153468701	T	psoriasis	-7.9489e-06	0.98111	0.122347	0.436	0.975633	0.999	S100A4
rs28707433	153469765	A	psoriasis	-8.0374e-06	0.9809	0.122459	0.4087	0.974312	0.999	S100A4
rs4845548	153470167	G	psoriasis	5.1073e-06	0.98787	0.122235	0.4218	0.974638	1	S100A4
rs9436094	153470792	C	psoriasis	4.6446e-06	0.98897	0.122101	0.4646	0.976602	1	S100A4
rs115249488	153470943	G	psoriasis	0.0005329	0.73765	0.00501966	0.2787	0.931108	1.05	S100A4
rs112742321	153471057	T	psoriasis	-0.00078574	0.36787	0.016595	0.665	0.953442	0.933	S100A4
rs6679509	153471297	T	psoriasis	-5.3775e-06	0.98722	0.122219	0.4649	0.976519	1	S100A4
rs4845549	153472285	G	psoriasis	-1.3103e-06	0.99689	0.122365	0.5049	0.974493	1	S100A4
rs56074066	153472415	T	psoriasis	0.00017053	0.70344	0.0682907	0.08955	0.913867	1.02	S100A4
rs4845550	153472556	G	psoriasis	-8.2158e-06	0.98046	0.12258	0.5003	0.974195	0.999	S100A4
rs4845551	153472594	T	psoriasis	1.2699e-06	0.99698	0.122064	0.4793	0.978635	1	S100A4
rs193139279	153473805	G	psoriasis	-0.0019425	0.0058543	0.0256354	0.642	0.952828	0.842	S100A4
rs10494299	153474243	G	psoriasis	-0.00049932	0.20971	0.0893299	0.3226	0.913845	0.957	S100A4
rs115397774	153474908	A	psoriasis	0.0005782	0.47583	0.0189421	0.5365	0.969011	1.05	S100A4
rs1964151	153475315	G	psoriasis	-8.9413e-06	0.97875	0.122139	0.4797	0.978844	0.999	S100A4
rs16835382	153475660	T	psoriasis	-1.9586e-05	0.9534	0.12262	0.4612	0.975593	0.998	S100A4
rs185612522	153476629	T	psoriasis	0.001111	0.39105	0.00734867	0.3965	0.968723	1.1	S100A4
rs3915524	153476901	G	psoriasis	-1.3637e-05	0.96752	0.122435	0.4759	0.978423	0.999	S100A4
rs139697629	153478015	A	psoriasis	-0.00094461	0.36199	0.0118485	0.6518	0.940051	0.92	S100A4
rs6696893	153479481	G	psoriasis	-2.5004e-05	0.94129	0.117395	0.6204	0.989002	0.998	S100A4
rs9436095	153479777	C	psoriasis	2.0392e-05	0.94856	0.138145	0.6885	0.996522	1	S100A4
rs28635377	153479846	T	psoriasis	1.4903e-05	0.96237	0.138297	0.7207	0.998688	1	S100A4
rs28632016	153479905	G	psoriasis	1.5139e-05	0.96178	0.1382	0.6887	0.999285	1	S100A4
rs4845552	153479998	A	psoriasis	1.1889e-05	0.97	0.1386	0.1769	genotyped	1	S100A4
rs4845553	153480173	A	psoriasis	1.7684e-05	0.95536	0.138234	0.6887	0.99779	1	S100A4
rs72711011	153480248	C	psoriasis	-0.001132	0.084537	0.02847	0.255	genotyped	0.905	S100A4
rs2339696	153480663	C	psoriasis	0.00019771	0.5843	0.101481	0.5927	0.995841	1.02	S100A4
rs189825172	153481571	A	psoriasis	0.00032535	0.66964	0.0226001	0.2713	0.924854	1.03	S100A4
rs6587743	153481717	C	psoriasis	0.00017941	0.61957	0.101304	0.6523	0.996981	1.02	S100A4
rs75339264	153481786	A	psoriasis	0.00063268	0.45537	0.0176462	0.2313	0.952084	1.06	S100A4
rs28410699	153482272	A	psoriasis	0.00018342	0.61112	0.101834	0.5745	0.989394	1.02	S100A4
rs17695220	153482943	C	psoriasis	0.00017671	0.62487	0.1013	0.6728	0.996746	1.02	S100A4
rs74703191	153483548	G	psoriasis	0.00038488	0.62952	0.01909	0.4906	genotyped	1.03	S100A4
rs28464843	153483806	A	psoriasis	0.00017885	0.6207	0.101318	0.6797	0.995157	1.02	S100A4
rs7520093	153484034	T	psoriasis	0.00017866	0.62108	0.101317	0.6797	0.995126	1.02	S100A4
rs7534343	153484148	C	psoriasis	0.00017901	0.62039	0.101323	0.6797	0.994941	1.02	S100A4
rs7534347	153484156	C	psoriasis	0.00017864	0.62111	0.101317	0.6797	0.99496	1.02	S100A4
rs6587745	153485284	A	psoriasis	0.00019206	0.59492	0.101582	0.5738	0.989254	1.02	S100A4
rs6587746	153485359	T	psoriasis	0.00019192	0.59519	0.101577	0.5738	0.98946	1.02	S100A4
rs7524035	153485794	T	psoriasis	0.00021006	0.59666	0.0883081	0.03321	0.927363	1.02	S100A4
rs28373181	153486801	A	psoriasis	-0.00088532	0.31655	0.0163341	0.7025	0.943657	0.925	S100A4
rs113976457	153487078	A	psoriasis	0.00027814	0.75921	0.0154974	0.04754	0.946932	1.02	S100A4
rs6690638	153487191	C	psoriasis	0.00019469	0.59069	0.101048	0.6245	0.991984	1.02	S100A4
rs6690712	153487212	A	psoriasis	0.00019561	0.58894	0.101056	0.6245	0.991941	1.02	S100A4
rs16835393	153487225	G	psoriasis	0.00019965	0.58078	0.101474	0.5732	0.988591	1.02	S100A4
rs7544359	153487714	C	psoriasis	0.00019565	0.58845	0.101358	0.5413	0.989041	1.02	S100A4
rs7515940	153488027	A	psoriasis	0.00019844	0.58326	0.101319	0.5413	0.988843	1.02	S100A4
rs7537898	153488080	C	psoriasis	0.00019842	0.58328	0.101319	0.5413	0.98885	1.02	S100A4
rs1887039	153488723	C	psoriasis	0.00019062	0.5984	0.101117	0.6048	0.991687	1.02	S100A4
rs7534823	153490810	C	psoriasis	0.00018912	0.60111	0.101285	0.4981	0.988767	1.02	S100A4
rs7534830	153490846	G	psoriasis	0.00017987	0.61934	0.101133	0.5783	0.990487	1.02	S100A4
rs4845554	153492017	A	psoriasis	0.00020166	0.57692	0.101493	0.5595	0.988457	1.02	S100A4
rs192159309	153492583	A	psoriasis	0.00097855	0.031526	0.0671711	0.3355	0.914382	1.09	S100A4
rs4430277	153493615	C	psoriasis	0.00019631	0.58773	0.101037	0.5903	0.991235	1.02	S100A4
rs4272569	153493800	A	psoriasis	0.00018996	0.59994	0.100973	0.6165	0.99376	1.02	S100A4
rs6659755	153495165	A	psoriasis	0.0001988	0.58293	0.101103	0.6301	0.989331	1.02	S100A4
rs6684970	153495244	T	psoriasis	0.00020244	0.57584	0.101244	0.678	0.988819	1.02	S100A4
rs4845555	153495671	A	psoriasis	0.00018986	0.60014	0.100967	0.6298	0.993448	1.02	S100A4
rs116620881	153495954	G	psoriasis	0.00062513	0.44009	0.018784	0.2581	0.981198	1.06	S100A4
rs7518306	153496247	A	psoriasis	0.00020069	0.57877	0.101472	0.5912	0.98903	1.02	S100A4
rs113410964	153496581	T	psoriasis	0.00030897	0.41408	0.0996687	0.04994	0.915623	1.03	S100A4
rs4845351	153496711	A	psoriasis	0.00020053	0.57941	0.101243	0.678	0.989126	1.02	S100A4
rs4845352	153496819	A	psoriasis	0.00019845	0.58352	0.101088	0.63	0.989717	1.02	S100A4
rs112125425	153496829	C	psoriasis	0.0011806	0.26161	0.011588	0.02094	0.932596	1.11	S100A4
rs73024420	153497360	A	psoriasis	-0.00034212	0.6857	0.0172896	1	0.96026	0.97	S100A4
rs7521972	153497596	A	psoriasis	0.00014725	0.71075	0.0822127	0.1888	0.987039	1.01	S100A4
rs80076001	153498377	A	psoriasis	-0.00012719	0.81482	0.04222	0.03069	genotyped	0.989	S100A4
rs28780420	153498976	T	psoriasis	-0.00079393	0.23285	0.02764	0.8011	genotyped	0.932	S100A4
rs2262587	153499485	C	psoriasis	0.00025023	0.4915	0.1008	2.941e-06	genotyped	1.02	S100A4
rs2265081	153500208	A	psoriasis	0.0010825	0.058825	0.03767	0.6061	genotyped	1.1	S100A4
rs74655801	153500368	C	psoriasis	-0.00027307	0.57821	0.05223	0.01758	genotyped	0.976	S100A4
rs2094737	153500813	T	psoriasis	-0.00027121	0.4522	0.10179	0.6737	0.995653	0.976	S100A4
rs2094738	153500831	A	psoriasis	-0.00027726	0.44282	0.101478	0.6938	0.991418	0.976	S100A4
rs9427239	153501202	G	psoriasis	-0.00027808	0.44105	0.101732	0.7432	0.994254	0.976	S100A4
rs143993877	153501259	T	psoriasis	0.0018714	0.30187	0.00394604	0.2248	0.909248	1.18	S100A4
rs114011304	153502030	A	psoriasis	0.00075196	0.26879	0.0287718	0.403	0.919608	1.07	S100A4
rs9426945	153502121	C	psoriasis	-0.00027395	0.44822	0.101726	0.736	0.99265	0.976	S100A4
rs9427287	153502286	A	psoriasis	-0.00027841	0.44178	0.101374	0.8364	0.988021	0.976	S100A4
rs532652	153502655	T	psoriasis	-0.00028386	0.43286	0.101432	0.8584	0.987858	0.975	S100A4
rs28483109	153504759	G	psoriasis	-0.0002317	0.54243	0.0911864	0.4179	0.981539	0.98	S100A4
rs114719191	153504863	A	psoriasis	-0.00072703	0.3674	0.01864	0.5069	genotyped	0.938	S100A4
rs585215	153505013	C	psoriasis	-0.0002296	0.54619	0.0911485	0.4176	0.981688	0.98	S100A4
rs552446	153505572	T	psoriasis	-0.0002114	0.57873	0.0910096	0.3923	0.981818	0.981	S100A4
rs550597	153505774	C	psoriasis	-0.00023996	0.52795	0.0913825	0.417	0.981043	0.979	S100A4
rs2480696	153506765	C	psoriasis	-0.00025101	0.50884	0.0914583	0.3597	0.981926	0.978	S100A4
rs75336351	153506892	A	psoriasis	0.00026679	0.59484	0.0545519	0.6979	0.909857	1.02	S100A4
rs201689788	153507679	G	psoriasis	0.0059389	0.38002	0.0002601	1	genotyped	1.69	S100A4
rs659403	153507959	C	psoriasis	-0.00024179	0.52498	0.0912389	0.37	0.981963	0.979	S100A4
rs141548428	153507960	C	psoriasis	-0.00038607	0.78347	0.00631761	1	0.957715	0.966	S100A4
rs28427870	153508400	T	psoriasis	-0.00035038	0.44084	0.0623756	0.9169	0.97763	0.969	S100A4
rs3762262	153508875	T	psoriasis	-0.00023902	0.52979	0.0912151	0.3868	0.982333	0.979	S100A4
rs2480695	153508996	G	psoriasis	-0.00024991	0.51069	0.0914528	0.411	0.982202	0.978	S100A4
rs3795393	153509890	T	psoriasis	0.00047962	0.27412	0.06621	0.8144	genotyped	1.04	S100A4
rs2248745	153509892	G	psoriasis	-0.00024234	0.52403	0.0912362	0.3182	0.982562	0.979	S100A4
rs2248832	153510517	T	psoriasis	-0.00024139	0.52564	0.091231	0.2937	0.982806	0.979	S100A4
rs477339	153510621	G	psoriasis	-0.0002521	0.50607	0.0918271	0.2424	0.986725	0.978	S100A4
rs472778	153511104	A	psoriasis	-0.00041471	0.4111	0.050191	0.6208	0.974045	0.964	S100A4
rs77868160	153511175	A	psoriasis	0.00082302	0.43092	0.0120962	0.3699	0.904536	1.08	S100A4
rs4017737	153512347	G	psoriasis	-0.00025071	0.50964	0.0914182	0.294	0.982234	0.978	S100A4
rs41265158	153512691	A	psoriasis	-0.0011178	0.19446	0.0163113	0.0779	1	0.906	S100A4
rs7535476	153514241	A	psoriasis	-0.00053207	0.28324	0.05105	0.6445	genotyped	0.954	S100A4
rs75846847	153514767	T	psoriasis	0.00035002	0.34877	0.0963747	0.01063	0.972833	1.03	S100A4
rs1810765	153515120	T	psoriasis	-0.00055956	0.25801	0.05126	0.5475	genotyped	0.952	S100A4
rs743687	153515525	G	psoriasis	0.00055942	0.26068	0.0507088	0.4222	0.988653	1.05	S100A4
rs79399329	153516733	A	psoriasis	0.00068003	0.17608	0.0497244	0.524	0.987574	1.06	S100A4
rs144311700	153517129	C	psoriasis	0.0012647	0.83467	0.000324	1	genotyped	1.12	S100A4
rs1050923	153517172	C	psoriasis	0.00063839	0.20397	0.0497748	0.3902	0.98727	1.06	S100A4
rs11488669	153517519	A	psoriasis	0.0006775	0.17665	0.0500499	0.4122	0.990322	1.06	S100A4
rs149514567	153517852	T	psoriasis	-0.0014531	0.4789	0.003108	0.235	0.900148	0.879	S100A4
rs56043239	153518483	C	psoriasis	0.00066724	0.18476	0.0495677	0.4303	0.992308	1.06	S100A4
rs56838169	153518783	A	psoriasis	0.00066702	0.18492	0.0495758	0.4412	0.991441	1.06	S100A4
rs60969679	153518953	A	psoriasis	0.00016338	0.77829	0.0372142	0.9422	0.979839	1.01	S100A4
rs79940391	153519175	G	psoriasis	-0.00070947	0.24174	0.03369	0.1257	genotyped	0.939	S100A4
rs41265160	153519941	A	psoriasis	0.00033576	0.39578	0.0864271	0.2935	0.958451	1.03	S100A4
rs73026350	153519981	G	psoriasis	0.00064397	0.20029	0.0495446	0.4433	0.994312	1.06	S100A4
rs41265162	153520138	T	psoriasis	0.00050439	0.31778	0.0490906	0.3474	0.994634	1.05	S100A4
rs41265164	153520203	A	psoriasis	0.00050461	0.31756	0.0490888	0.3474	0.994741	1.05	S100A4
rs116208483	153520280	G	psoriasis	0.00029017	0.82671	0.006821	0.7035	genotyped	1.03	S100A4
rs56089062	153520400	C	psoriasis	0.00051203	0.31078	0.0490458	0.3864	0.995111	1.05	S100A4
rs78031781	153520513	T	psoriasis	0.00097772	0.44005	0.00781024	1	0.944537	1.09	S100A4
rs56350425	153520520	C	psoriasis	0.00050726	0.31501	0.0490748	0.4069	0.996432	1.05	S100A4
rs28718953	153520784	A	psoriasis	0.0005271	0.29672	0.0489735	0.4168	0.998199	1.05	S100A4
rs28594230	153520790	C	psoriasis	0.00052955	0.29409	0.0490645	0.4281	0.995385	1.05	S100A4
rs28452456	153520804	G	psoriasis	0.00052705	0.29674	0.0489729	0.4168	0.998395	1.05	S100A4
rs36022742	153520954	C	psoriasis	-0.00054791	0.27821	0.04896	0.5302	genotyped	0.953	S100A4
rs28548347	153521018	C	psoriasis	0.00053019	0.2938	0.048951	0.4168	0.999449	1.05	S100A4
rs111742567	153521276	A	psoriasis	-0.00023409	0.53748	0.09074	0.01388	genotyped	0.98	S100A4
rs538438377	153521279	T	psoriasis	0.00058989	0.86885	0.00101474	1	0.904382	1.05	S100A4
rs59376279	153521321	G	psoriasis	0.00051498	0.30803	0.0489551	0.4163	0.997593	1.05	S100A4
rs58072118	153521472	T	psoriasis	0.0005093	0.31356	0.0489372	0.4377	0.997509	1.05	S100A4
rs57024596	153521496	C	psoriasis	0.00050764	0.31514	0.0489364	0.4377	0.997487	1.05	S100A4
rs61265945	153521525	A	psoriasis	0.0005084	0.3144	0.0489841	0.4378	0.996748	1.05	S100A4
rs4595398	153521653	C	psoriasis	0.0004701	0.35186	0.04913	0.4954	0.995752	1.04	S100A4
rs1005436	153521932	G	psoriasis	-0.00017419	0.59707	0.1258	0.3119	genotyped	0.985	S100A4
rs75928889	153521952	G	psoriasis	-0.00096943	0.2089	0.02037	0.1791	genotyped	0.918	S100A4
rs3762268	153522350	G	psoriasis	0.00037127	0.47377	0.0464918	0.4725	0.992828	1.03	S100A4
rs60218214	153522437	T	psoriasis	0.00037997	0.46364	0.0464452	0.4843	0.99229	1.03	S100A4
rs557227488	153522554	A	psoriasis	-0.00043259	0.89489	0.00120445	0.39	0.913768	0.962	S100A4
rs74115473	153523290	C	psoriasis	0.00042507	0.41501	0.0460034	0.6102	0.984744	1.04	S100A4
rs60287468	153523492	A	psoriasis	0.00042512	0.41498	0.0460041	0.6239	0.984582	1.04	S100A4
rs80292901	153524060	T	psoriasis	8.4125e-05	0.89887	0.0282175	0.8759	0.974659	1.01	S100A4
rs6427301	153524349	G	psoriasis	0.00041083	0.42945	0.0463129	0.5845	0.985804	1.04	S100A4
rs6700310	153524433	C	psoriasis	0.00043738	0.40173	0.046035	0.5045	0.982276	1.04	S100A4
rs58056804	153524706	A	psoriasis	0.0004226	0.41801	0.0459964	0.4675	0.983913	1.04	S100A4
rs113622975	153525116	T	psoriasis	0.00065106	0.28311	0.0338607	0.8359	0.988094	1.06	S100A4
rs79835457	153525299	A	psoriasis	0.00042957	0.41055	0.0459625	0.4917	0.98387	1.04	S100A4
rs74115476	153525417	G	psoriasis	0.00040729	0.43358	0.0463282	0.6116	0.984608	1.04	S100A4
rs55955983	153526349	G	psoriasis	0.00040574	0.43546	0.0463256	0.6252	0.983912	1.04	S100A4
rs55917879	153527439	T	psoriasis	-0.0014046	0.048767	0.0259142	0.6956	0.91985	0.883	S100A4
rs28472359	153528079	C	psoriasis	0.00072933	0.051652	0.0969644	0.9139	0.965937	1.07	S100A4
rs28689606	153530231	A	psoriasis	0.00035536	0.49567	0.0461908	0.5434	0.97881	1.03	S100A4
rs16835437	153531282	G	psoriasis	0.00043366	0.40695	0.0459395	0.5684	0.979963	1.04	S100A4
rs116122162	153531697	G	psoriasis	-0.00032974	0.61126	0.0294	0.0386	genotyped	0.971	S100A4
rs72711020	153532117	G	psoriasis	-0.00028066	0.37921	0.1363	0.003002	genotyped	0.975	S100A4
rs61558997	153532811	A	psoriasis	0.00043461	0.4061	0.0459294	0.5551	0.979244	1.04	S100A4
rs115968445	153533183	G	psoriasis	0.0004048	0.43853	0.0460455	0.5962	0.978943	1.04	S100A4
rs8401	153533898	G	psoriasis	0.00040208	0.4404	0.0463279	0.5576	0.979518	1.04	S100A4
rs1047325	153534027	T	psoriasis	0.00039944	0.44392	0.0462104	0.5438	0.978792	1.04	S100A4
rs189082738	153534150	A	psoriasis	0.0011156	0.44372	0.00588779	1	0.943948	1.1	S100A4
rs16835455	153535163	G	psoriasis	0.00042505	0.41636	0.0460459	0.5296	0.975959	1.04	S100A4
rs6671398	153535509	G	psoriasis	0.00039833	0.44578	0.0462035	0.5835	0.977224	1.04	S100A4
rs2071576	153538449	T	psoriasis	5.415e-05	0.84764	0.185	0.001156	genotyped	1	S100A4
rs41265168	153539404	T	psoriasis	0.0007254	0.24012	0.0330976	0.8945	0.973004	1.07	S100A4
rs56057245	153539773	T	psoriasis	0.00039259	0.45606	0.0456496	0.9365	0.96773	1.04	S100A4
rs6702891	153540186	A	psoriasis	0.00015807	0.77447	0.0414908	0.7414	0.968667	1.01	S100A4
rs41265170	153540282	T	psoriasis	0.0010378	0.49708	0.00542998	0.6343	0.932988	1.1	S100A4
rs6703014	153540320	T	psoriasis	0.00014215	0.79651	0.0415577	0.809	0.96792	1.01	S100A4
rs3762270	153540573	T	psoriasis	0.00052852	0.2769	0.05327	0.4618	genotyped	1.05	S100A4
rs75061918	153541327	A	psoriasis	0.00011229	0.86669	0.0278125	0.7253	0.97706	1.01	S100A4
rs144540500	153541447	C	psoriasis	0.00032411	0.76114	0.0109618	0.02658	0.948236	1.03	S100A4
rs112545786	153542900	C	psoriasis	7.3743e-05	0.89744	0.0383362	0.704	0.97062	1.01	S100A4
rs55815414	153543851	C	psoriasis	0.00011167	0.84527	0.0382342	0.6692	0.978936	1.01	S100A4
rs148202992	153543963	A	psoriasis	0.00011098	0.8464	0.0381366	0.6346	0.979607	1.01	S100A4
rs187248659	153544672	A	psoriasis	0.0020448	0.13953	0.00680967	0.2901	0.911203	1.2	S100A4
rs80169191	153545437	C	psoriasis	0.00037109	0.72946	0.0107103	0.009967	0.962508	1.03	S100A4
rs28636749	153546306	A	psoriasis	4.1141e-05	0.94245	0.0385963	0.6918	0.971653	1	S100A4
rs9662163	153548179	C	psoriasis	7.2105e-05	0.89915	0.0385069	0.7099	0.977167	1.01	S100A4
rs16835464	153549673	T	psoriasis	-0.00017399	0.75922	0.03867	0.9448	genotyped	0.985	S100A4
rs28715047	153550679	C	psoriasis	4.347e-05	0.93919	0.0386071	0.6084	0.97172	1	S100A4
rs60069797	153550886	G	psoriasis	6.3611e-05	0.91118	0.0386306	0.7092	0.97045	1.01	S100A4
rs57034503	153551050	T	psoriasis	-0.00015076	0.8219	0.0276793	0.5671	0.979581	0.987	S100A4
rs79245801	153551467	A	psoriasis	0.00014036	0.8529	0.02124	0.2709	genotyped	1.01	S100A4
rs116674798	153551491	C	psoriasis	-0.0002929	0.6443	0.03043	0.3014	genotyped	0.974	S100A4
rs112684015	153553555	A	psoriasis	-0.00075175	0.21808	0.0346269	0.5334	0.948279	0.936	S100A4
rs146096977	153554118	G	psoriasis	-0.0014938	0.20284	0.008689	0.06484	genotyped	0.876	S100A4
rs78906464	153554324	T	psoriasis	0.0012608	0.28635	0.00860953	0.04889	0.990645	1.12	S100A4
rs77506948	153554424	G	psoriasis	-0.0010381	0.1338	0.0259122	0.48	0.977741	0.912	S100A4
rs115834760	153554535	G	psoriasis	-0.00096855	0.16561	0.0255565	0.5175	0.973363	0.918	S100A4
rs9660509	153554675	A	psoriasis	-0.0010463	0.13043	0.0259243	0.4802	0.979337	0.912	S100A4
rs149530803	153556343	A	psoriasis	-0.00022402	0.70665	0.0360484	0.2973	0.95645	0.98	S100A4
rs118186842	153556846	A	psoriasis	0.001416	0.23674	0.0086567	0.02868	0.949446	1.13	S100A4
rs74821689	153557011	C	psoriasis	-0.0010362	0.13237	0.025898	0.4598	0.989293	0.912	S100A4
rs28463744	153557122	T	psoriasis	-0.00081618	0.17789	0.0349394	0.5234	0.95375	0.93	S100A4
rs77607386	153557291	A	psoriasis	-0.00023235	0.69541	0.0362803	0.2626	0.954583	0.98	S100A4
rs146078300	153557399	C	psoriasis	0.0020289	0.13627	0.0068916	0.0321	0.923707	1.2	S100A4
rs9727230	153557682	C	psoriasis	-0.001064	0.12105	0.0259741	0.421	0.997295	0.91	S100A4
rs9726592	153557969	C	psoriasis	0.0010235	0.13501	0.02612	0.1332	genotyped	1.09	S100A4
rs1475363	153558000	T	psoriasis	-0.0011039	0.10757	0.0259675	0.421	0.998983	0.907	S100A4
rs56404043	153559042	A	psoriasis	0.0033751	0.26903	0.0013719	0.4587	0.919266	1.35	S100A4
rs76247425	153559247	T	psoriasis	-0.0010345	0.13194	0.025919	0.4802	0.997659	0.913	S100A4
rs9725884	153559579	A	psoriasis	-0.0010601	0.12229	0.0259767	0.421	0.997413	0.911	S100A4
rs28827011	153559727	G	psoriasis	0.001579	0.19027	0.00871131	0.02967	0.928968	1.15	S100A4
rs28857273	153560040	A	psoriasis	-0.00054233	0.13178	0.105631	0.2834	0.967751	0.953	S100A4
rs140841369	153560506	C	psoriasis	-0.00079283	0.18906	0.0348584	0.959	0.964449	0.932	S100A4
rs28705063	153560808	A	psoriasis	-0.00018065	0.76376	0.0351174	0.1567	0.96089	0.984	S100A4
rs28590661	153562515	G	psoriasis	-0.00028068	0.63558	0.0359843	0.2324	0.969729	0.975	S100A4
rs113117543	153563742	G	psoriasis	-0.00063893	0.16018	0.0620114	0.8951	0.983276	0.945	S100A4
rs2026564	153565636	G	psoriasis	-0.00057152	0.11046	0.105657	0.2741	0.978885	0.951	S100A4
rs28727278	153566025	A	psoriasis	-0.00063101	0.14307	0.0710466	0.4247	0.964215	0.946	S100A4
rs116358780	153566320	A	psoriasis	-0.0010324	0.13248	0.0259724	0.3648	0.995042	0.913	S100A4
rs72711021	153566574	G	psoriasis	-0.0012668	0.055016	0.02813	0.04234	genotyped	0.894	S100A4
rs76459982	153567363	A	psoriasis	0.00099958	0.19247	0.02067	0.797	genotyped	1.09	S100A4
rs78216419	153567613	A	psoriasis	-0.0010604	0.012049	0.0800558	0.8785	0.902668	0.911	S100A4
rs78531062	153567890	C	psoriasis	-0.0010034	0.14424	0.0259067	0.4005	0.992577	0.915	S100A4
rs75640779	153568288	G	psoriasis	-0.0010017	0.14488	0.0259068	0.4005	0.99277	0.915	S100A4
rs74115497	153568747	A	psoriasis	-0.00084633	0.15379	0.0350414	0.9594	0.997575	0.928	S100A4
rs9727835	153568782	A	psoriasis	-0.0010228	0.13597	0.0259729	0.3649	0.99621	0.914	S100A4
rs9729962	153568986	T	psoriasis	0.00077875	0.034696	0.09716	0.07033	genotyped	1.07	S100A4
rs74115498	153569007	A	psoriasis	0.00085167	0.15082	0.03509	0.919	genotyped	1.08	S100A4
rs9729063	153569160	A	psoriasis	-0.001028	0.1345	0.0259558	0.3649	0.994158	0.913	S100A4
rs76058318	153569436	T	psoriasis	-0.00066624	0.085335	0.0897332	0.3035	0.969417	0.943	S100A4
rs73009940	153569599	T	psoriasis	-0.00059318	0.097081	0.105595	0.3152	0.98321	0.949	S100A4
rs114958173	153570000	C	psoriasis	-0.0011077	0.25474	0.0134415	0.7379	0.941108	0.907	S100A4
rs79114095	153570554	A	psoriasis	-0.0010671	0.12399	0.0258463	0.3648	0.977463	0.91	S100A4
rs79421023	153570904	A	psoriasis	-0.0010778	0.12117	0.0258189	0.3649	0.973648	0.909	S100A4
rs28737329	153571023	C	psoriasis	-0.00060694	0.091557	0.105332	0.2274	0.972606	0.948	S100A4
rs77958802	153572083	T	psoriasis	-0.00088459	0.14451	0.0347103	0.9385	0.962043	0.925	S100A4
rs76964673	153572197	C	psoriasis	0.00047654	0.4185	0.03569	0.007673	genotyped	1.04	S100A4
rs60753958	153572236	A	psoriasis	-0.0011174	0.11108	0.0257183	0.457	0.960113	0.906	S100A4
rs9724713	153573499	T	psoriasis	-0.0011596	0.10079	0.0256294	0.3734	0.947581	0.903	S100A4
rs75733313	153573971	C	psoriasis	-0.0011484	0.10548	0.025524	0.4464	0.941682	0.903	S100A4
rs11799643	209879599	T	psoriasis	0.00044224	0.84656	0.00245063	1	0.9521	1.04	TRAF3IP3
rs12040780	209879846	G	psoriasis	-0.00015249	0.94688	0.00242877	1	0.955629	0.987	TRAF3IP3
rs12086634	209880259	T	psoriasis	1.7211e-05	0.94979	0.1998	0.06679	genotyped	1	TRAF3IP3
rs2236902	209881045	G	psoriasis	-3.9815e-05	0.96883	0.0116956	0.3673	0.9902	0.996	TRAF3IP3
rs11807619	209881373	T	psoriasis	0.00018603	0.52909	0.162972	0.8409	0.996738	1.02	TRAF3IP3
rs2282738	209882015	T	psoriasis	-4.0348e-05	0.87989	0.212019	0.7703	0.996666	0.996	TRAF3IP3
rs11811440	209882900	A	psoriasis	0.00021916	0.45551	0.165751	0.9655	0.996608	1.02	TRAF3IP3
rs11806703	209882906	T	psoriasis	0.00021876	0.45632	0.165756	0.9655	0.996647	1.02	TRAF3IP3
rs2282739	209883001	T	psoriasis	-2.2173e-06	0.99334	0.215033	0.9879	0.997291	1	TRAF3IP3
rs116434075	209883349	T	psoriasis	-0.0001062	0.90319	0.0172669	0.3711	0.913749	0.991	TRAF3IP3
rs2236903	209883480	T	psoriasis	-8.3435e-06	0.97493	0.215179	0.9717	0.997803	0.999	TRAF3IP3
rs11119327	209883804	C	psoriasis	1.4882e-05	0.95642	0.200329	0.526	0.999252	1	TRAF3IP3
rs2884090	209884059	T	psoriasis	-8.5015e-06	0.97445	0.215191	0.9758	0.997802	0.999	TRAF3IP3
rs1474654	209884387	G	psoriasis	0.00020139	0.49168	0.166373	0.9166	0.998968	1.02	TRAF3IP3
rs17015053	209884712	A	psoriasis	0.00022722	0.92083	0.00242207	1	0.959508	1.02	TRAF3IP3
rs1474655	209884730	C	psoriasis	0.00020203	0.49031	0.166365	0.9117	0.998988	1.02	TRAF3IP3
rs149271964	209884778	C	psoriasis	-0.00058649	0.72883	0.00426448	0.4298	0.971676	0.949	TRAF3IP3
rs61820570	209884953	T	psoriasis	0.00020096	0.49262	0.166408	0.9117	0.998765	1.02	TRAF3IP3
rs11119328	209885318	A	psoriasis	0.00018869	0.51878	0.167345	0.8877	0.996628	1.02	TRAF3IP3
rs968033	209885371	C	psoriasis	0.00047885	0.42616	0.0342665	2.867e-05	1	1.04	TRAF3IP3
rs4844488	209885509	A	psoriasis	0.00057143	0.27444	0.04613	0.001161	genotyped	1.05	TRAF3IP3
rs34148285	209886260	A	psoriasis	9.5262e-05	0.77483	0.129756	0.9631	0.945433	1.01	TRAF3IP3
rs12138452	209886578	A	psoriasis	1.3726e-05	0.9598	0.200349	0.5294	0.999247	1	TRAF3IP3
rs12024779	209887212	T	psoriasis	0.00044717	0.84207	0.00249212	1	0.961141	1.04	TRAF3IP3
rs79092794	209887651	A	psoriasis	-0.00095344	0.23957	0.0184682	0.2088	1	0.919	TRAF3IP3
rs846906	209887718	C	psoriasis	0.00021474	0.47346	0.165651	0.3057	0.958668	1.02	TRAF3IP3
rs12094117	209888435	T	psoriasis	1.9863e-05	0.94185	0.200369	0.5649	0.999117	1	TRAF3IP3
rs114622579	209888794	T	psoriasis	-0.0018411	0.16059	0.00750663	0.07304	0.91416	0.85	TRAF3IP3
rs140160635	209889288	A	psoriasis	0.00030735	0.83638	0.00591132	1	0.907828	1.03	TRAF3IP3
rs12090931	209889601	G	psoriasis	1.12e-05	0.96719	0.200377	0.5649	0.999083	1	TRAF3IP3
rs11119330	209889659	G	psoriasis	1.1299e-05	0.9669	0.200371	0.5649	0.99906	1	TRAF3IP3
rs11119331	209889712	A	psoriasis	1.1125e-05	0.96742	0.200373	0.5649	0.999071	1	TRAF3IP3
rs10863783	209889802	C	psoriasis	1.1226e-05	0.96712	0.200372	0.5649	0.999088	1	TRAF3IP3
rs71636127	209890528	T	psoriasis	-0.0008221	0.24529	0.0256085	0.07051	0.947284	0.93	TRAF3IP3
rs58627173	209891423	T	psoriasis	-0.00031728	0.88932	0.00240574	1	0.963714	0.972	TRAF3IP3
rs11808690	209891450	G	psoriasis	8.3085e-06	0.97566	0.200418	0.5724	0.999374	1	TRAF3IP3
rs11485195	209891738	C	psoriasis	8.1916e-06	0.976	0.200425	0.5724	0.999408	1	TRAF3IP3
rs77959785	209891813	A	psoriasis	0.00013196	0.8973	0.0115468	0.4066	0.9956	1.01	TRAF3IP3
rs56822893	209891906	A	psoriasis	5.1267e-05	0.95624	0.0139519	0.3075	0.981569	1	TRAF3IP3
rs74636431	209892035	G	psoriasis	0.00013375	0.89591	0.0115443	0.4066	0.995728	1.01	TRAF3IP3
rs11487866	209892046	A	psoriasis	4.7475e-06	0.9861	0.200207	0.5651	0.998286	1	TRAF3IP3
rs11487867	209892070	T	psoriasis	-0.00010784	0.70305	0.182168	0.4737	0.99531	0.991	TRAF3IP3
rs79096793	209892706	A	psoriasis	0.00012034	0.90628	0.0115596	0.4494	0.994769	1.01	TRAF3IP3
rs11119332	209892960	T	psoriasis	7.8692e-06	0.97694	0.200429	0.5652	0.999455	1	TRAF3IP3
rs79077043	209894039	G	psoriasis	-0.00065667	0.33827	0.0264859	0.8673	0.980115	0.944	TRAF3IP3
rs6672256	209894043	A	psoriasis	-1.6071e-05	0.9527	0.202946	0.4046	0.99953	0.999	TRAF3IP3
rs1000283	209894661	G	psoriasis	-6.9533e-06	0.97974	0.2012	0.0002801	genotyped	0.999	TRAF3IP3
rs1000282	209894785	C	psoriasis	-1.5523e-05	0.95433	0.202848	0.4697	0.999239	0.999	TRAF3IP3
rs11119333	209895031	T	psoriasis	-0.00034193	0.88074	0.00240584	1	0.964316	0.97	TRAF3IP3
rs3766619	209895298	G	psoriasis	-1.5088e-05	0.95559	0.202939	0.4288	0.999478	0.999	TRAF3IP3
rs3766618	209895437	T	psoriasis	-0.00013088	0.64146	0.184859	0.3704	0.996746	0.988	TRAF3IP3
rs117838752	209895608	G	psoriasis	-0.00059328	0.72594	0.00426254	0.4298	0.971519	0.949	TRAF3IP3
rs6679099	209895852	G	psoriasis	-1.5096e-05	0.95557	0.202942	0.4257	0.999437	0.999	TRAF3IP3
rs2298930	209896212	T	psoriasis	6.268e-05	0.95116	0.0115258	0.4057	0.99536	1.01	TRAF3IP3
rs12116437	209897027	A	psoriasis	-1.1606e-05	0.96583	0.203014	0.4413	0.99918	0.999	TRAF3IP3
rs61279558	209897062	G	psoriasis	-0.00035121	0.87747	0.00240708	1	0.964654	0.969	TRAF3IP3
rs7539852	209898539	G	psoriasis	-1.835e-05	0.94598	0.203358	0.3904	0.998465	0.998	TRAF3IP3
rs2282740	209900307	A	psoriasis	8.7846e-05	0.93158	0.0115242	0.4057	0.995503	1.01	TRAF3IP3
rs2282741	209900609	C	psoriasis	-3.8049e-05	0.8855	0.218024	0.8844	0.997904	0.997	TRAF3IP3
rs9430012	209900615	C	psoriasis	-2.9859e-05	0.9123	0.203025	0.4257	0.997365	0.997	TRAF3IP3
rs1415542	209902110	C	psoriasis	5.0775e-05	0.85011	0.207745	0.3502	0.998189	1	TRAF3IP3
rs76557741	209902333	C	psoriasis	-0.00058766	0.61015	0.0098203	0.2597	0.91652	0.949	TRAF3IP3
rs9430013	209902416	A	psoriasis	-1.2578e-05	0.97008	0.128123	0.9876	0.942032	0.999	TRAF3IP3
rs12561766	209904252	G	psoriasis	9.4592e-05	0.92635	0.0115158	0.496	0.996194	1.01	TRAF3IP3
rs12060922	209904433	A	psoriasis	4.9675e-05	0.85337	0.207496	0.3801	0.998608	1	TRAF3IP3
rs9430014	209905372	C	psoriasis	5.2194e-05	0.84596	0.207757	0.3423	0.998221	1	TRAF3IP3
rs547126172	209905409	T	psoriasis	0.00051005	0.84775	0.00182943	0.01927	0.918078	1.05	TRAF3IP3
rs932335	209905734	C	psoriasis	5.1438e-05	0.84817	0.207751	0.3449	0.99817	1	TRAF3IP3
rs12059226	209906675	G	psoriasis	5.0518e-05	0.85091	0.207505	0.383	0.998655	1	TRAF3IP3
rs12060420	209906819	G	psoriasis	6.1447e-05	0.81889	0.208448	0.488	0.998551	1.01	TRAF3IP3
rs6752	209908100	A	psoriasis	7.2604e-05	0.78691	0.208136	0.5511	0.998032	1.01	TRAF3IP3
rs142571522	209908841	G	psoriasis	0.00017142	0.89342	0.00759364	0.8238	0.960353	1.02	TRAF3IP3
rs10863785	209908876	C	psoriasis	6.4371e-05	0.81034	0.208713	0.4755	0.998314	1.01	TRAF3IP3
rs12123431	209908899	C	psoriasis	-0.0017693	0.23117	0.00577389	0.4583	0.947294	0.855	TRAF3IP3
rs2064148	209909385	G	psoriasis	5.3728e-05	0.83761	0.222588	0.828	0.99902	1	TRAF3IP3
rs111488558	209909509	T	psoriasis	-0.00030802	0.62199	0.03212	1.801e-26	genotyped	0.973	TRAF3IP3
rs144878630	209910763	A	psoriasis	0.00058917	0.60632	0.0100907	0.6958	0.907578	1.05	TRAF3IP3
rs184279913	209910778	T	psoriasis	-0.0038057	0.011374	0.00568065	0.7473	0.926802	0.714	TRAF3IP3
rs9430015	209911734	A	psoriasis	4.3111e-05	0.86944	0.222201	0.8782	0.999035	1	TRAF3IP3
rs1337531	209911988	T	psoriasis	-3.7676e-05	0.88597	0.2224	0.449	genotyped	0.997	TRAF3IP3
rs2205985	209912100	G	psoriasis	5.068e-05	0.84668	0.222684	0.7783	0.998432	1	TRAF3IP3
rs12129718	209912540	T	psoriasis	7.3965e-05	0.77859	0.220254	0.6402	0.998577	1.01	TRAF3IP3
rs17015076	209912593	T	psoriasis	0.0001777	0.8609	0.011763	0.6038	0.989643	1.02	TRAF3IP3
rs4545339	209912742	G	psoriasis	0.0001818	0.85767	0.011768	0.604	0.990062	1.02	TRAF3IP3
rs1415544	209913043	T	psoriasis	7.3728e-05	0.77929	0.220253	0.6402	0.998471	1.01	TRAF3IP3
rs7555978	209913271	C	psoriasis	4.8076e-05	0.85452	0.222404	0.8822	0.999243	1	TRAF3IP3
rs114803247	209913418	T	psoriasis	0.00020734	0.83784	0.011776	0.604	0.990421	1.02	TRAF3IP3
rs12120361	209913473	G	psoriasis	6.5267e-05	0.80778	0.208751	0.508	0.997454	1.01	TRAF3IP3
rs79880650	209913916	G	psoriasis	0.00013435	0.89465	0.0117461	0.6031	0.990436	1.01	TRAF3IP3
rs140379557	209914004	T	psoriasis	0.00017405	0.89603	0.00677624	0.1574	0.99084	1.02	TRAF3IP3
rs74406304	209914100	A	psoriasis	0.00020357	0.84056	0.011888	0.6037	0.985239	1.02	TRAF3IP3
rs75420308	209914231	T	psoriasis	0.0001785	0.86027	0.0117669	0.6039	0.989406	1.02	TRAF3IP3
rs57606822	209914265	T	psoriasis	2.4735e-05	0.99317	0.00151625	1	0.964152	1	TRAF3IP3
rs4844891	209914409	C	psoriasis	4.6493e-05	0.85927	0.222402	0.8822	0.999042	1	TRAF3IP3
rs667681	209914449	G	psoriasis	-5.7912e-05	0.82915	0.208464	0.5346	0.998339	0.995	TRAF3IP3
rs182652640	209914823	A	psoriasis	0.0011754	0.7405	0.00102774	1	0.915443	1.11	TRAF3IP3
rs57891047	209915214	A	psoriasis	0.00032596	0.80654	0.00677798	0.158	0.991536	1.03	TRAF3IP3
rs7515014	209915464	G	psoriasis	1.0396e-05	0.99172	0.0121075	0.5634	0.979347	1	TRAF3IP3
rs7548781	209915795	T	psoriasis	7.2668e-05	0.78232	0.220741	0.7319	0.996773	1.01	TRAF3IP3
rs17015078	209916218	G	psoriasis	8.4279e-06	0.99328	0.0121095	0.5634	0.979125	1	TRAF3IP3
rs7528642	209916598	A	psoriasis	0.00011404	0.91013	0.0118776	0.659	0.98349	1.01	TRAF3IP3
rs75572632	209916744	G	psoriasis	0.00018386	0.89026	0.00676867	0.1572	0.990629	1.02	TRAF3IP3
rs17389184	209916789	T	psoriasis	-4.2862e-05	0.87758	0.190097	0.4573	0.995059	0.996	TRAF3IP3
rs9430016	209916884	G	psoriasis	4.4072e-05	0.86911	0.211063	0.906	0.995912	1	TRAF3IP3
rs7532021	209917729	A	psoriasis	0.00012628	0.89528	0.0132424	0.421	0.980274	1.01	TRAF3IP3
rs7532324	209918090	A	psoriasis	7.1028e-05	0.78725	0.220656	0.7848	0.996476	1.01	TRAF3IP3
rs3765240	209918151	A	psoriasis	4.6897e-05	0.8609	0.210725	0.9345	0.995581	1	TRAF3IP3
rs3817821	209918503	T	psoriasis	3.4827e-05	0.89435	0.222978	0.9371	0.996991	1	TRAF3IP3
rs1999826	209919275	T	psoriasis	4.4422e-05	0.8682	0.21073	0.9427	0.99518	1	TRAF3IP3
rs143006553	209919416	T	psoriasis	0.0012977	0.60414	0.00206243	0.332	0.914645	1.12	TRAF3IP3
rs56679555	209920272	G	psoriasis	-0.0014294	0.58794	0.00183084	1	0.964661	0.881	TRAF3IP3
rs2038053	209920538	A	psoriasis	0.0001596	0.87634	0.0114837	0.4943	0.993245	1.01	TRAF3IP3
rs12034758	209920545	A	psoriasis	5.6507e-05	0.83334	0.208925	0.7802	0.995596	1.01	TRAF3IP3
rs6680324	209921193	C	psoriasis	0.0001441	0.96059	0.00149381	1	0.962649	1.01	TRAF3IP3
rs72741019	209922031	C	psoriasis	-0.00238	0.014748	0.01265	0.5334	genotyped	0.81	TRAF3IP3
rs17389198	209922058	A	psoriasis	0.00010214	0.70159	0.213279	0.7326	0.995062	1.01	TRAF3IP3
rs187202513	209922102	T	psoriasis	0.0024309	0.22957	0.00316402	0.7826	0.916459	1.24	TRAF3IP3
rs12030655	209922123	T	psoriasis	8.8845e-05	0.73815	0.215127	0.9596	0.995087	1.01	TRAF3IP3
rs6540549	209922668	C	psoriasis	8.2568e-05	0.75122	0.227802	0.9689	0.994522	1.01	TRAF3IP3
rs6702301	209923154	T	psoriasis	9.0882e-05	0.7324	0.215144	0.9636	0.994577	1.01	TRAF3IP3
rs17015095	209924087	C	psoriasis	0.00014645	0.95998	0.00149136	1	0.962753	1.01	TRAF3IP3
rs17015099	209924175	C	psoriasis	-0.0022507	0.3733	0.00200223	1	0.968547	0.82	TRAF3IP3
rs10157973	209924425	T	psoriasis	9.0886e-05	0.73231	0.215418	0.9394	0.994749	1.01	TRAF3IP3
rs9430017	209925058	T	psoriasis	0.00010616	0.69046	0.213169	0.7712	0.995127	1.01	TRAF3IP3
rs6540550	209925251	G	psoriasis	8.8935e-05	0.73771	0.215551	0.9596	0.995578	1.01	TRAF3IP3
rs6540551	209925295	T	psoriasis	8.4416e-05	0.75076	0.215137	1	0.995008	1.01	TRAF3IP3
rs57283682	209926027	G	psoriasis	0.00017615	0.86367	0.0114815	0.5411	0.992788	1.02	TRAF3IP3
rs679846	209926069	A	psoriasis	8.7922e-05	0.74064	0.21536	0.9032	0.995375	1.01	TRAF3IP3
rs7521461	209926207	G	psoriasis	8.5157e-05	0.74848	0.215511	0.9677	0.995476	1.01	TRAF3IP3
rs146163164	209926239	G	psoriasis	-0.00074364	0.41334	0.0153311	0.6414	0.947197	0.936	TRAF3IP3
rs6679405	209926468	C	psoriasis	8.0169e-05	0.7629	0.215189	0.9838	0.99458	1.01	TRAF3IP3
rs6540552	209927710	T	psoriasis	-8.0486e-05	0.76201	0.215208	1	0.994369	0.993	TRAF3IP3
rs12075595	209927822	C	psoriasis	-0.0022805	0.36377	0.00201599	1	0.96995	0.817	TRAF3IP3
rs78522228	209928077	A	psoriasis	8.301e-05	0.93554	0.0114705	0.492	0.992979	1.01	TRAF3IP3
rs553752035	209928212	A	psoriasis	-0.0035727	0.17443	0.00184747	0.6331	0.929147	0.729	TRAF3IP3
rs6540553	209929044	G	psoriasis	0.00010267	0.70047	0.212676	0.9348	0.995178	1.01	TRAF3IP3
rs627670	209929299	A	psoriasis	-8.9527e-05	0.73724	0.212924	0.858	0.994859	0.992	TRAF3IP3
rs2272866	209929453	T	psoriasis	0.00016519	0.87207	0.0114759	0.4925	0.993727	1.01	TRAF3IP3
rs2272867	209929579	A	psoriasis	0.00013226	0.6213	0.21065	0.9262	0.995752	1.01	TRAF3IP3
rs2272868	209929603	G	psoriasis	-0.0011537	0.24919	0.0124821	0.28	0.946192	0.903	TRAF3IP3
rs11119336	209930585	C	psoriasis	0.00010091	0.70658	0.210144	0.7732	0.994444	1.01	TRAF3IP3
rs4844893	209930678	T	psoriasis	0.00015408	0.88068	0.0114565	0.5436	0.994728	1.01	TRAF3IP3
rs909710	209930694	A	psoriasis	0.00011476	0.66805	0.210792	0.8134	0.995403	1.01	TRAF3IP3
rs4844894	209931129	T	psoriasis	0.0001676	0.8702	0.011466	0.4941	0.995111	1.01	TRAF3IP3
rs6665715	209931353	A	psoriasis	8.5314e-05	0.74897	0.212864	0.9919	0.996673	1.01	TRAF3IP3
rs1007693	209931799	T	psoriasis	-3.9571e-05	0.87877	0.229234	0.657	0.998276	0.997	TRAF3IP3
rs2294406	209932026	G	psoriasis	5.3911e-05	0.95808	0.0114509	0.5438	0.997217	1	TRAF3IP3
rs2294407	209932055	T	psoriasis	0.00031706	0.26989	0.185859	0.5652	0.948543	1.03	TRAF3IP3
rs10489341	209932121	T	psoriasis	-0.0012248	0.10978	0.0208623	0.9333	0.98551	0.897	TRAF3IP3
rs6540554	209932297	A	psoriasis	-4.434e-05	0.86424	0.229264	0.6536	0.999243	0.996	TRAF3IP3
rs144358775	209932638	C	psoriasis	-0.0030253	0.032464	0.00627957	0.5708	0.948638	0.765	TRAF3IP3
rs180704292	209932863	C	psoriasis	-0.00057584	0.6991	0.00582741	0.7679	0.920568	0.95	TRAF3IP3
rs6685077	209933331	G	psoriasis	-3.4746e-05	0.89316	0.230702	0.6005	0.999584	0.997	TRAF3IP3
rs151094826	209933400	C	psoriasis	0.0038636	0.26781	0.0009691	2.843e-05	genotyped	1.41	TRAF3IP3
rs2076149	209933528	A	psoriasis	4.7786e-06	0.99631	0.0112395	0.3142	0.998204	1	TRAF3IP3
rs2076150	209933540	G	psoriasis	-3.127e-05	0.90381	0.230539	0.5838	0.999759	0.997	TRAF3IP3
rs2076151	209933660	G	psoriasis	7.2989e-05	0.9633	0.004758	0.2697	genotyped	1.01	TRAF3IP3
rs6696463	209933757	C	psoriasis	-3.1028e-05	0.90455	0.230549	0.5904	0.999748	0.997	TRAF3IP3
rs11119337	209934133	G	psoriasis	-3.6931e-05	0.8846	0.241979	0.3922	0.99942	0.997	TRAF3IP3
rs2142860	209934753	C	psoriasis	7.2913e-05	0.94382	0.0112305	0.3936	0.9987	1.01	TRAF3IP3
rs643118	209934841	C	psoriasis	2.7826e-05	0.91437	0.230494	0.5937	0.999649	1	TRAF3IP3
rs6700223	209935031	G	psoriasis	1.6354e-05	0.94882	0.2417	0.8087	genotyped	1	TRAF3IP3
rs6691905	209935201	A	psoriasis	-3.1269e-05	0.90381	0.230533	0.5937	0.999891	0.997	TRAF3IP3
rs6692012	209935490	G	psoriasis	-3.0111e-05	0.90736	0.230504	0.5904	0.999832	0.997	TRAF3IP3
rs6679631	209935491	A	psoriasis	-3.0146e-05	0.90725	0.230504	0.5904	0.999823	0.997	TRAF3IP3
rs10489342	209935778	A	psoriasis	3.7204e-05	0.88592	0.2303	0.5442	genotyped	1	TRAF3IP3
rs7548219	209936466	G	psoriasis	-8.4433e-05	0.74335	0.233457	0.5356	0.997172	0.993	TRAF3IP3
rs6540555	209936571	G	psoriasis	-4.421e-05	0.86395	0.233867	0.5706	0.994313	0.996	TRAF3IP3
rs6540556	209936631	A	psoriasis	-6.4311e-05	0.80339	0.232666	0.5346	0.995964	0.994	TRAF3IP3
rs7536882	209936673	G	psoriasis	-6.7536e-05	0.79352	0.233169	0.5228	0.996667	0.994	TRAF3IP3
rs17015169	209936914	T	psoriasis	-6.1384e-05	0.81397	0.228304	0.6554	0.988732	0.995	TRAF3IP3
rs57756261	209937163	T	psoriasis	-0.0012798	0.094092	0.0210034	0.9668	0.982556	0.893	TRAF3IP3
rs12079960	209937168	C	psoriasis	-8.3731e-05	0.74529	0.234139	0.6073	0.995045	0.993	TRAF3IP3
rs3753606	209937212	C	psoriasis	-8.2904e-05	0.74772	0.234106	0.5974	0.995057	0.993	TRAF3IP3
rs611861	209937251	G	psoriasis	7.4268e-05	0.77329	0.233986	0.6072	0.994935	1.01	TRAF3IP3
rs654984	209937382	T	psoriasis	7.0904e-05	0.78328	0.234119	0.6409	0.994731	1.01	TRAF3IP3
rs11119338	209937693	A	psoriasis	0.0011151	0.19503	0.0165308	0.5622	0.981749	1.1	TRAF3IP3
rs10863786	209937764	G	psoriasis	-6.8796e-05	0.78956	0.234108	0.6649	0.994929	0.994	TRAF3IP3
rs34824504	209937809	A	psoriasis	0.00042939	0.25736	0.0957111	0.1872	0.954064	1.04	TRAF3IP3
rs79185203	209938768	C	psoriasis	-0.00033139	0.74605	0.0115741	0.45	0.987721	0.971	TRAF3IP3
rs140683555	209938870	A	psoriasis	0.00052726	0.79472	0.00312025	0.2757	0.925333	1.05	TRAF3IP3
rs11119339	209938987	A	psoriasis	-0.00024363	0.26693	0.461654	0.7388	0.99231	0.979	TRAF3IP3
rs56057644	209939135	T	psoriasis	-0.00022902	0.61173	0.0651411	0.5809	0.955234	0.98	TRAF3IP3
rs10779513	209939599	T	psoriasis	-0.00024526	0.26366	0.461709	0.7649	0.992487	0.979	TRAF3IP3
rs187653925	209939702	G	psoriasis	-0.001513	0.19306	0.00919149	0.4986	0.962269	0.875	TRAF3IP3
rs6660087	209939792	C	psoriasis	-0.00027649	0.28896	0.228535	0.8958	0.989748	0.976	TRAF3IP3
rs78267924	209939806	T	psoriasis	-0.0003369	0.74184	0.011584	0.3659	0.987602	0.971	TRAF3IP3
rs11119340	209940560	A	psoriasis	0.00010445	0.69585	0.211461	0.3866	0.996082	1.01	TRAF3IP3
rs11119341	209940675	T	psoriasis	9.1727e-05	0.73101	0.212354	0.4345	0.995172	1.01	TRAF3IP3
rs75634817	209941043	A	psoriasis	-0.00032688	0.74967	0.0115542	0.4497	0.986277	0.972	TRAF3IP3
rs193188589	209941089	A	psoriasis	-0.0011993	0.45862	0.00465603	0.2672	0.973931	0.899	TRAF3IP3
rs148679978	209941749	G	psoriasis	-0.0020216	0.4486	0.00179487	0.07712	0.923782	0.836	TRAF3IP3
rs12131636	209942435	C	psoriasis	9.0597e-05	0.73409	0.212244	0.2819	0.996817	1.01	TRAF3IP3
rs7523300	209942510	T	psoriasis	-0.00022832	0.29725	0.461285	0.8799	0.995823	0.98	TRAF3IP3
rs144034763	209942911	A	psoriasis	0.0025405	0.125	0.00441551	0.07714	0.984128	1.25	TRAF3IP3
rs11119343	209943156	A	psoriasis	0.00012219	0.57871	0.4408	0.7656	genotyped	1.01	TRAF3IP3
rs11119344	209943489	A	psoriasis	-0.00025908	0.31959	0.227673	0.9884	0.996616	0.977	TRAF3IP3
rs4990735	209943592	C	psoriasis	4.7797e-05	0.86209	0.1952	0.5358	genotyped	1	TRAF3IP3
rs374065171	209944072	A	psoriasis	-0.00011558	0.93201	0.00661623	0.08376	0.976116	0.99	TRAF3IP3
rs111064822	209944544	A	psoriasis	-0.001195	0.12008	0.0208843	0.8991	0.976667	0.9	TRAF3IP3
rs189956766	209944686	C	psoriasis	-0.00033519	0.74366	0.0115805	0.362	0.979671	0.971	TRAF3IP3
rs6699288	209944962	A	psoriasis	-0.00013071	0.74156	0.0900816	0.1296	0.922413	0.989	TRAF3IP3
rs1883308	209945018	G	psoriasis	-0.00024216	0.27002	0.473508	0.6619	0.98795	0.979	TRAF3IP3
rs147791408	209946310	C	psoriasis	-0.0023026	0.33404	0.002103	0.4127	genotyped	0.816	TRAF3IP3
rs143274417	209946445	T	psoriasis	-0.00017086	0.9356	0.00293552	0.7637	0.907869	0.985	TRAF3IP3
rs590223	209946707	A	psoriasis	5.2854e-05	0.81494	0.378009	0.5087	0.98989	1	TRAF3IP3
rs607303	209947524	T	psoriasis	5.4031e-05	0.80927	0.390823	0.8381	0.994584	1	TRAF3IP3
rs11119345	209947548	A	psoriasis	-0.00025693	0.7962	0.0122564	0.5705	0.986874	0.978	TRAF3IP3
rs4140636	209947885	C	psoriasis	-0.00013734	0.88619	0.013235	0.7922	0.979166	0.988	TRAF3IP3
rs149275993	209948070	A	psoriasis	-0.0019839	0.044923	0.0125266	0.4056	0.979061	0.839	TRAF3IP3
rs79422166	209948221	C	psoriasis	0.0017411	0.2381	0.00578339	0.8777	0.949285	1.17	TRAF3IP3
rs17015183	209948711	C	psoriasis	-8.9172e-05	0.75863	0.170763	0.9712	0.994278	0.992	TRAF3IP3
Affx-80269128	209948835	GTA	psoriasis	-0.013121	0.24335	9.404e-05	1	genotyped	0.313	TRAF3IP3
rs41307652	209949055	C	psoriasis	0.00042832	0.76406	0.00591	1.987e-05	genotyped	1.04	TRAF3IP3
rs41303065	209949474	G	psoriasis	0.00081669	0.42647	0.01143	0.2984	genotyped	1.07	TRAF3IP3
rs41314250	209949557	G	psoriasis	0.0012628	0.23596	0.0113984	0.1579	0.921413	1.12	TRAF3IP3
rs12058100	209950132	T	psoriasis	-0.0002637	0.7905	0.0122932	0.4799	0.989517	0.977	TRAF3IP3
rs146480929	209950166	A	psoriasis	-0.0015484	0.15293	0.011322	0.1214	0.900202	0.872	TRAF3IP3
rs41315591	209950244	C	psoriasis	-0.00052968	0.73333	0.00536914	0.5021	0.917442	0.954	TRAF3IP3
rs648349	209950486	G	psoriasis	0.00026928	0.22472	0.412588	0.1876	0.998768	1.02	TRAF3IP3
rs649275	209950681	C	psoriasis	5.1054e-05	0.82054	0.377356	0.5589	0.997719	1	TRAF3IP3
rs669694	209950760	G	psoriasis	-2.5324e-06	0.99254	0.2064	0.02853	genotyped	1	TRAF3IP3
rs41305104	209950848	A	psoriasis	-7.0214e-05	0.81063	0.166822	0.6289	0.994586	0.994	TRAF3IP3
rs41303303	209951400	C	psoriasis	-0.00084838	0.066588	0.05922	0.4224	genotyped	0.928	TRAF3IP3
rs12083685	209951602	A	psoriasis	-0.00010991	0.90948	0.013018	0.8932	0.982584	0.99	TRAF3IP3
rs41274834	209951723	T	psoriasis	-0.00018604	0.84574	0.0133226	0.6467	0.981193	0.984	TRAF3IP3
rs41274836	209951830	G	psoriasis	-0.00024901	0.80198	0.0122465	0.4791	0.991969	0.978	TRAF3IP3
rs12143281	209951894	T	psoriasis	-0.00085773	0.09606	0.048651	0.4807	0.967253	0.927	TRAF3IP3
rs12081405	209952266	A	psoriasis	-0.00024289	0.80671	0.0122488	0.4792	0.992363	0.979	TRAF3IP3
rs6699507	209952346	C	psoriasis	-0.0003295	0.22993	0.196992	0.771	0.99757	0.971	TRAF3IP3
rs623360	209952865	C	psoriasis	-0.00030821	0.16573	0.4127	0.004969	genotyped	0.973	TRAF3IP3
rs76690388	209953075	G	psoriasis	-0.00076796	0.5244	0.00894912	0.02569	0.907893	0.934	TRAF3IP3
rs2076153	209953571	G	psoriasis	0.00025937	0.24003	0.425589	0.3195	0.998503	1.02	TRAF3IP3
rs11590807	209953706	T	psoriasis	-0.00034698	0.2063	0.196522	0.7379	0.998567	0.97	TRAF3IP3
rs151244953	209954570	A	psoriasis	1.0988e-05	0.99319	0.00791466	0.2552	0.906035	1	TRAF3IP3
rs651141	209955848	A	psoriasis	-0.00025299	0.25227	0.4284	0.02789	genotyped	0.978	TRAF3IP3
Affx-52118473	209956426	A	psoriasis	-0.0047309	0.37711	0.0004148	1	genotyped	0.658	TRAF3IP3
rs7550857	209956542	C	psoriasis	0.00010207	0.72524	0.1703	0.4663	genotyped	1.01	TRAF3IP3
rs183234598	209957151	T	psoriasis	0.0021133	0.046991	0.0110311	0.4668	0.960919	1.21	TRAF3IP3
rs41303289	209957910	T	psoriasis	-0.0018671	0.1378	0.00798918	0.823	0.946405	0.848	TRAF3IP3
rs4844895	209958580	C	psoriasis	-0.00010911	0.69894	0.18256	0.6159	0.99961	0.99	TRAF3IP3
rs7526313	209958599	C	psoriasis	-0.00035571	0.19541	0.196117	0.7011	0.999196	0.969	TRAF3IP3
rs1856161	209959168	T	psoriasis	-4.0935e-05	0.96713	0.0122464	0.8313	0.996227	0.996	TRAF3IP3
rs1044516	209959614	T	psoriasis	-0.00010126	0.71961	0.182808	0.6282	0.9984	0.991	TRAF3IP3
rs680331	209959872	A	psoriasis	-7.7228e-05	0.77405	0.208354	0.05955	0.996019	0.993	TRAF3IP3
rs2235372	209960436	A	psoriasis	-0.00011254	0.68997	0.182657	0.616	0.999218	0.99	TRAF3IP3
rs599021	209960922	C	psoriasis	0.00026304	0.23356	0.426552	0.43	0.997673	1.02	TRAF3IP3
rs742214	209960925	C	psoriasis	-0.0001102	0.69668	0.182116	0.6317	0.99764	0.99	TRAF3IP3
rs742215	209961023	A	psoriasis	-0.00010891	0.69947	0.182566	0.6159	0.999544	0.99	TRAF3IP3
rs75012801	209961286	C	psoriasis	0.00040371	0.73796	0.00848668	0.2964	0.966904	1.04	TRAF3IP3
rs17317411	209961314	C	psoriasis	-5.6145e-05	0.84831	0.165434	0.7916	0.998874	0.995	TRAF3IP3
rs187379424	209961354	A	psoriasis	-0.0035129	0.019595	0.00555125	0.05486	0.949844	0.733	TRAF3IP3
rs926346	209962204	T	psoriasis	-0.00010671	0.71297	0.170261	0.9376	0.99945	0.991	TRAF3IP3
rs614662	209962419	T	psoriasis	3.8982e-05	0.8624	0.377062	0.7274	0.998696	1	TRAF3IP3
rs7522250	209962539	C	psoriasis	-9.8551e-05	0.72685	0.182623	0.62	0.999276	0.991	TRAF3IP3
rs2073485	209962794	A	psoriasis	-0.00011268	0.68965	0.182513	0.6119	0.999631	0.99	TRAF3IP3
rs145873101	209962944	G	psoriasis	0.002118	0.047566	0.0109621	0.626	0.957615	1.21	TRAF3IP3
rs2235373	209963803	A	psoriasis	-0.00010833	0.70114	0.182378	0.6278	0.999639	0.99	TRAF3IP3
rs2235371	209964080	C	psoriasis	0.00011355	0.90901	0.0122	1	genotyped	1.01	TRAF3IP3
rs41303263	209964141	G	psoriasis	-0.0012606	0.44073	0.00454319	0.133	0.978885	0.895	TRAF3IP3
rs674433	209964875	T	psoriasis	-3.9778e-05	0.88527	0.194078	0.2297	0.999253	0.996	TRAF3IP3
rs926347	209965193	C	psoriasis	-9.0846e-05	0.75424	0.170159	0.952	0.999392	0.992	TRAF3IP3
rs926348	209965283	C	psoriasis	-0.00030293	0.1781	0.378412	0.6196	0.999491	0.974	TRAF3IP3
rs2235375	209965587	C	psoriasis	-0.00029842	0.18463	0.378594	0.5943	0.999288	0.974	TRAF3IP3
rs76317523	209966309	T	psoriasis	-0.0012882	0.17651	0.0135739	0.2507	0.974369	0.892	TRAF3IP3
rs17015217	209966629	A	psoriasis	-0.00011896	0.90466	0.0121971	0.6188	0.999057	0.99	TRAF3IP3
rs595918	209966843	G	psoriasis	-3.125e-05	0.90969	0.194307	0.2038	0.999719	0.997	TRAF3IP3
rs2179254	209967380	C	psoriasis	0.00030729	0.17195	0.378368	0.5992	0.999439	1.03	TRAF3IP3
rs75594643	209967651	C	psoriasis	-0.00039157	0.55968	0.0276548	0.2029	0.974014	0.966	TRAF3IP3
rs17015218	209967915	G	psoriasis	-8.9208e-05	0.75853	0.17015	0.9808	0.999387	0.992	TRAF3IP3
rs1474608	209968239	G	psoriasis	0.00086504	0.3667	0.0137044	1	0.947676	1.08	TRAF3IP3
rs6685182	209968319	C	psoriasis	0.00030292	0.1781	0.378411	0.6196	0.999538	1.03	TRAF3IP3
rs2013196	209968411	T	psoriasis	-0.00036579	0.18316	0.196161	0.6732	0.998562	0.968	TRAF3IP3
rs2013162	209968684	A	psoriasis	-0.00030292	0.17809	0.378412	0.6196	0.999536	0.974	TRAF3IP3
rs17015224	209968918	A	psoriasis	-9.0906e-05	0.75407	0.170177	0.9472	0.999412	0.992	TRAF3IP3
rs529022571	209969592	C	psoriasis	-0.001228	0.69416	0.00127476	1	0.956323	0.897	TRAF3IP3
rs7552506	209969902	C	psoriasis	-0.00029772	0.18855	0.366257	0.708	0.999569	0.974	TRAF3IP3
rs17015226	209970096	G	psoriasis	-9.0332e-05	0.75556	0.170167	0.9568	0.999512	0.992	TRAF3IP3
rs7555285	209970355	C	psoriasis	-3.9699e-05	0.88541	0.194373	0.2039	0.999492	0.996	TRAF3IP3
rs59043219	209970610	A	psoriasis	-0.00030268	0.17843	0.378408	0.617	0.999636	0.974	TRAF3IP3
rs58637469	209971480	A	psoriasis	-0.00011135	0.70207	0.169411	0.9566	0.99677	0.99	TRAF3IP3
rs2236906	209971485	G	psoriasis	0.00027379	0.21506	0.427165	0.3334	0.997099	1.02	TRAF3IP3
rs2236907	209971628	A	psoriasis	-0.00030278	0.17828	0.378405	0.617	0.999625	0.974	TRAF3IP3
rs2236908	209971640	C	psoriasis	-0.00030266	0.17845	0.378408	0.617	0.999637	0.974	TRAF3IP3
rs2236909	209971655	G	psoriasis	-0.00031078	0.16744	0.377776	0.6477	0.998653	0.973	TRAF3IP3
rs2005982	209972075	A	psoriasis	0.00030378	0.17685	0.378421	0.6119	0.999626	1.03	TRAF3IP3
rs4844494	209972198	A	psoriasis	-0.00011952	0.90421	0.0121994	0.6188	0.99943	0.989	TRAF3IP3
rs115472888	209972406	C	psoriasis	0.00084137	0.5016	0.00838908	0.2642	0.907185	1.08	TRAF3IP3
rs2294408	209973549	A	psoriasis	-0.00030304	0.1779	0.378417	0.6221	0.999622	0.974	TRAF3IP3
rs1160411	209973922	C	psoriasis	-0.00030269	0.17841	0.378408	0.6196	0.999633	0.974	TRAF3IP3
rs622832	209974232	C	psoriasis	-3.163e-05	0.90857	0.194511	0.21	0.999084	0.997	TRAF3IP3
rs147419621	209975215	G	psoriasis	-0.00043239	0.69494	0.0105947	0.3312	0.928926	0.962	TRAF3IP3
rs861019	209975386	G	psoriasis	0.00026947	0.22198	0.426887	0.2919	0.99905	1.02	TRAF3IP3
rs2235377	209975392	C	psoriasis	-0.00018136	0.85476	0.0123064	0.4797	0.996552	0.984	TRAF3IP3
rs2073486	209976215	A	psoriasis	-0.00030019	0.18201	0.378543	0.6298	0.99954	0.974	TRAF3IP3
rs150411337	209976392	A	psoriasis	-0.00085814	0.58148	0.00540995	0.1755	0.90905	0.927	TRAF3IP3
rs6694552	209976459	C	psoriasis	-9.0553e-05	0.75499	0.170168	0.9568	0.999509	0.992	TRAF3IP3
rs2073487	209976646	C	psoriasis	-0.00029786	0.18542	0.37858	0.5943	0.999612	0.974	TRAF3IP3
rs861020	209977111	G	psoriasis	-3.0138e-05	0.91319	0.1936	0.002268	genotyped	0.997	TRAF3IP3
rs12405750	209977844	T	psoriasis	-0.00013759	0.88975	0.0122454	0.6195	0.997788	0.988	TRAF3IP3
rs3753518	209977964	C	psoriasis	-8.7385e-05	0.76326	0.170225	0.952	0.999536	0.992	TRAF3IP3
rs3753517	209978098	T	psoriasis	-0.00012383	0.90075	0.0122049	0.6189	0.999504	0.989	TRAF3IP3
rs184423677	209978183	A	psoriasis	0.004473	0.19487	0.00110359	1	0.903924	1.49	TRAF3IP3
rs17015250	209978777	G	psoriasis	-0.00027689	0.21815	0.379703	0.5552	0.999013	0.976	TRAF3IP3
rs682461	209978953	G	psoriasis	-0.00014346	0.7859	0.0449224	0.4732	0.990201	0.987	TRAF3IP3
rs12403599	209979014	C	psoriasis	-0.00029103	0.19562	0.379104	0.5697	0.999648	0.975	TRAF3IP3
rs12403006	209979518	A	psoriasis	-0.0004676	0.078979	0.21352	0.6481	0.999568	0.96	TRAF3IP3
rs7545538	209979613	G	psoriasis	-0.00036936	0.096044	0.425637	0.2873	0.987855	0.968	TRAF3IP3
rs7545542	209979635	T	psoriasis	-0.00038846	0.081658	0.395911	0.3768	0.999867	0.966	TRAF3IP3
rs111971879	209979670	G	psoriasis	-0.00099365	0.41014	0.00888343	0.4207	0.924881	0.916	TRAF3IP3
rs846808	209980027	T	psoriasis	0.00037287	0.092786	0.412312	0.2476	0.998775	1.03	TRAF3IP3
rs6659549	209980155	G	psoriasis	-0.00038587	0.083759	0.396018	0.4268	0.999409	0.966	TRAF3IP3
rs2357229	209980489	G	psoriasis	0.0003724	0.096017	0.3956	0.02255	genotyped	1.03	TRAF3IP3
rs139196868	209980595	C	psoriasis	0.00048743	0.56024	0.0176527	0.4874	0.977192	1.04	TRAF3IP3
rs1005287	209980757	A	psoriasis	-0.00038605	0.083563	0.395884	0.433	0.999859	0.966	TRAF3IP3
rs60014300	209981304	C	psoriasis	-0.0012469	0.44565	0.00450558	0.3053	0.992302	0.896	TRAF3IP3
rs6540558	209981778	C	psoriasis	-0.0012542	0.44323	0.00450328	0.3052	0.991757	0.895	TRAF3IP3
rs6540559	209982025	A	psoriasis	-0.00012301	0.66272	0.182872	0.6445	0.998268	0.989	TRAF3IP3
rs6540560	209982073	T	psoriasis	-9.317e-05	0.74816	0.170158	0.9424	0.999356	0.992	TRAF3IP3
rs6540561	209982255	T	psoriasis	-9.3172e-05	0.74815	0.170158	0.9424	0.999354	0.992	TRAF3IP3
rs630984	209982293	A	psoriasis	-3.9427e-09	0.99999	0.190955	0.1501	0.999014	1	TRAF3IP3
rs146357352	209982331	A	psoriasis	-0.00090558	0.28541	0.0178397	0.8071	0.942371	0.923	TRAF3IP3
rs6696825	209982372	G	psoriasis	-0.00012423	0.65965	0.182789	0.6774	0.998342	0.989	TRAF3IP3
rs632746	209982515	T	psoriasis	-3.5898e-06	0.98968	0.190904	0.1363	0.998883	1	TRAF3IP3
rs17015255	209982738	G	psoriasis	-0.00011958	0.90416	0.012197	0.6189	0.999856	0.989	TRAF3IP3
rs17015259	209982923	A	psoriasis	-0.00012402	0.66018	0.182787	0.6691	0.998324	0.989	TRAF3IP3
rs764093	209983331	G	psoriasis	-0.00012281	0.66334	0.182764	0.6858	0.998252	0.989	TRAF3IP3
rs11119346	209983900	T	psoriasis	-0.00026924	0.78499	0.0123827	0.622	0.991177	0.976	TRAF3IP3
rs11119347	209983916	C	psoriasis	-0.00011959	0.90414	0.0121971	0.6189	0.99984	0.989	TRAF3IP3
rs2069068	209984013	T	psoriasis	-0.00027266	0.78233	0.0123844	0.622	0.991109	0.976	TRAF3IP3
rs75477785	209984470	G	psoriasis	-0.00011885	0.90474	0.0121964	0.6189	0.999873	0.99	TRAF3IP3
rs190593759	209984618	T	psoriasis	0.00096518	0.23048	0.0199599	0.3634	0.936576	1.09	TRAF3IP3
rs7544804	209984804	T	psoriasis	-0.00046207	0.082615	0.213454	0.6849	0.999597	0.96	TRAF3IP3
rs10489343	209984824	T	psoriasis	-0.00011962	0.90413	0.0121972	0.6189	0.999805	0.989	TRAF3IP3
rs11805830	209984969	T	psoriasis	-9.031e-05	0.75566	0.170124	0.9232	0.999343	0.992	TRAF3IP3
rs554288201	209985074	G	psoriasis	-0.0010304	0.58	0.00371697	1	0.92405	0.913	TRAF3IP3
rs144029480	209985123	G	psoriasis	-0.0011181	0.16093	0.0204604	0.4455	0.930408	0.906	TRAF3IP3
rs77037440	209985136	T	psoriasis	-0.00011885	0.90474	0.0121964	0.6189	0.999866	0.99	TRAF3IP3
rs12064398	209985951	C	psoriasis	-0.00011915	0.9045	0.0121993	0.6189	0.999722	0.99	TRAF3IP3
rs12069187	209985952	T	psoriasis	-0.00011863	0.90491	0.012197	0.6189	0.999913	0.99	TRAF3IP3
rs11803382	209986426	A	psoriasis	-9.0909e-05	0.7541	0.170127	0.9328	0.999236	0.992	TRAF3IP3
rs112139052	209986553	G	psoriasis	-0.0012951	0.15645	0.01462	0.4808	0.98754	0.892	TRAF3IP3
rs680923	209986672	C	psoriasis	2.0866e-06	0.994	0.190816	0.147	0.999446	1	TRAF3IP3
rs12566152	209986747	T	psoriasis	-0.00011759	0.90575	0.0121941	0.6188	0.999913	0.99	TRAF3IP3
rs192176212	209986969	T	psoriasis	-0.00014646	0.9225	0.00546137	0.02426	0.960825	0.987	TRAF3IP3
rs17317580	209987128	C	psoriasis	-0.00046557	0.079757	0.214864	0.6206	0.998233	0.96	TRAF3IP3
rs17389541	209987172	G	psoriasis	-0.0004644	0.080522	0.214846	0.6206	0.998247	0.96	TRAF3IP3
rs536760299	209987190	G	psoriasis	0.0059983	0.092441	0.00102318	1	0.902196	1.7	TRAF3IP3
rs10779514	209987624	T	psoriasis	-0.00011661	0.90653	0.0121932	0.6188	0.999918	0.99	TRAF3IP3
rs10779515	209987632	A	psoriasis	-0.00017231	0.86201	0.0122746	0.5708	0.997732	0.985	TRAF3IP3
rs12134698	209987801	A	psoriasis	5.3155e-06	0.98472	0.190812	0.1581	0.999425	1	TRAF3IP3
rs10863789	209987919	C	psoriasis	-0.00011648	0.90664	0.0121931	0.6188	0.999961	0.99	TRAF3IP3
rs10863790	209988047	A	psoriasis	0.00010147	0.91868	0.01219	0.8309	genotyped	1.01	TRAF3IP3
rs12744453	209988240	G	psoriasis	-0.00083222	0.23555	0.0252527	0.2654	0.976416	0.929	TRAF3IP3
rs79384526	209988274	G	psoriasis	-0.00011755	0.90578	0.0121941	0.6188	0.999918	0.99	TRAF3IP3
rs77249837	209988527	A	psoriasis	-0.00011276	0.90963	0.0121897	0.6185	0.999713	0.99	TRAF3IP3
rs75889558	209988809	T	psoriasis	-0.00011166	0.91051	0.0121887	0.6185	0.999788	0.99	TRAF3IP3
[truncated: 79 more rows]
